# Supplementary material
Source: PubMed Central journal article supplement (PMC3704157)
Supplement: NIHMS474984-supplement-1.pdf [file NIHMS474984-supplement-1.pdf]

## Supporting Online Material

### Targeted resequencing in epileptic encephalopathies identifies *de novo* mutations in *CHD2* and *SYNGAP1*

Gemma L. Carvill<sup>1</sup>, Sinéad B. Heavin<sup>2</sup>, Simone C. Yendle<sup>2</sup>, Jacinta M. McMahon<sup>2</sup>, Brian J. O’Roak<sup>3</sup>, Joseph Cook<sup>1</sup>, Adiba Khan<sup>1</sup>, Michael O’ Dorschner<sup>4,5</sup>, Molly Weaver<sup>4,5</sup>, Sophie Calvert<sup>6</sup>, Stephen Malone<sup>6</sup>, Geoffrey Wallace<sup>6</sup>, Thorsten Stanley<sup>7</sup>, Ann M. E. Bye<sup>8</sup>, Andrew Bleasel<sup>9</sup>, Katherine B. Howell<sup>10</sup>, Sara Kivity<sup>11</sup>, Mark T. Mackay<sup>10, 12, 13</sup>, Victoria Rodriguez-Casero<sup>14</sup>, Richard Webster<sup>15</sup>, Amos Korczyn<sup>16</sup>, Zaid Afawi<sup>17</sup>, Nathanel Zelnick<sup>18</sup>, Tally Lerman-Sagie<sup>19</sup>, Dorit Lev<sup>19</sup>, Rikke S. Møller<sup>20</sup>, Deepak Gill<sup>15</sup>, Danielle M. Andrade<sup>21</sup>, Jeremy L. Freeman<sup>10, 12</sup>, Lynette G. Sadleir<sup>7</sup>, Jay Shendure<sup>3</sup>, Samuel F. Berkovic<sup>2</sup>, Ingrid E. Scheffer<sup>2,10, 13,22\*</sup>, Heather C. Mefford<sup>1\*</sup>

#### Affiliations

1. Division of Genetic Medicine, Department of Pediatrics, University of Washington, Seattle, Washington, 98195, USA
2. Epilepsy Research Centre, Department of Medicine, University of Melbourne, Austin Health, Melbourne, Victoria, Australia
3. Department of Genome Sciences, University of Washington, Seattle, Washington, 98195, USA
4. Department of Psychiatry & Behavioral Sciences, University of Washington, Seattle, Washington, 98195, USA
5. Veteran Affairs Puget Sound Health Care System, Seattle, WA 98108, USA
6. Neurosciences Children’s Health Queensland, Royal and Mater Children’s Hospitals, Brisbane, Queensland, Australia
7. Department of Paediatrics, School of Medicine and Health Sciences, University of Otago, Wellington, New Zealand
8. Department of Paediatric Neurology, University of New South Wales, Sydney Children’s Hospital, Sydney, New South Wales, Australia
9. Westmead Hospital, University of Sydney, Sydney, New South Wales, Australia
10. Department of Neurology, The Royal Children’s Hospital, Parkville, Melbourne, Victoria, Australia
11. Epilepsy Unit, Schneider Children’s Medical Center of Israel, Petach Tikvah, Israel
12. Critical Care & Neurosciences Theme, Murdoch Childrens Research Institute, Melbourne, Victoria, Australia
13. Department of Paediatrics, The University of Melbourne, The Royal Children’s Hospital, Melbourne, Victoria, Australia
14. Paediatric Neurology, Monash Medical Centre, Melbourne, Victoria, Australia
15. TY Nelson Department of Neurology, The Children’s Hospital at Westmead, Sydney, New South Wales, Australia
16. Department of Neurology, Tel-Aviv University, Tel-Aviv, Israel
17. Tel-Aviv University Medical School, Tel-Aviv, Israel
18. Department of Pediatrics, Carmel Medical Center, Technion Faculty of Medicine, Haifa, Israel

19. Metabolic-Neurogenetic Service, Wolfson Medical Center, Holon, and Sackler School of Medicine, Tel-Aviv University, Tel-Aviv, Israel
20. Danish Epilepsy Centre, Dianalund, Denmark
21. Division of Neurology, Department of Medicine, University of Toronto, Toronto Western Hospital, Krembil Neurosciences Program. Toronto, Canada
22. Florey Institute, Melbourne, Victoria, Australia

\* To whom correspondence should be addressed:

Heather C. Mefford, [hmefford@uw.edu](mailto:hmefford@uw.edu);

Ingrid E. Scheffer, [scheffer@unimelb.edu.au](mailto:scheffer@unimelb.edu.au)

## **Table of contents**

**Supplementary Figure 1** Targeted resequencing strategy carried out in 500 patients with epileptic encephalopathy.

**Supplementary Figure 2** Percentage of each target gene resequenced at >25X

**Supplementary Figure 3** Microdeletions of the 15q26.1 region encompassing *CHD2*

**Supplementary Figure 4** The p.Y805X *HNRNPU* variant in proband T162

**Supplementary Figure 5** Pedigrees of segregating variants in known epileptic encephalopathy genes

**Supplementary Table 1** Potentially disruptive variants in known epileptic encephalopathy genes

**Supplementary Note:** Candidate gene selection from epilepsy-associated CNVs

**Supplementary Table 2** Candidate gene selection details

**Supplementary Table 3** Details of molecular inversion probes used to capture 65 target genes

**Supplementary References**

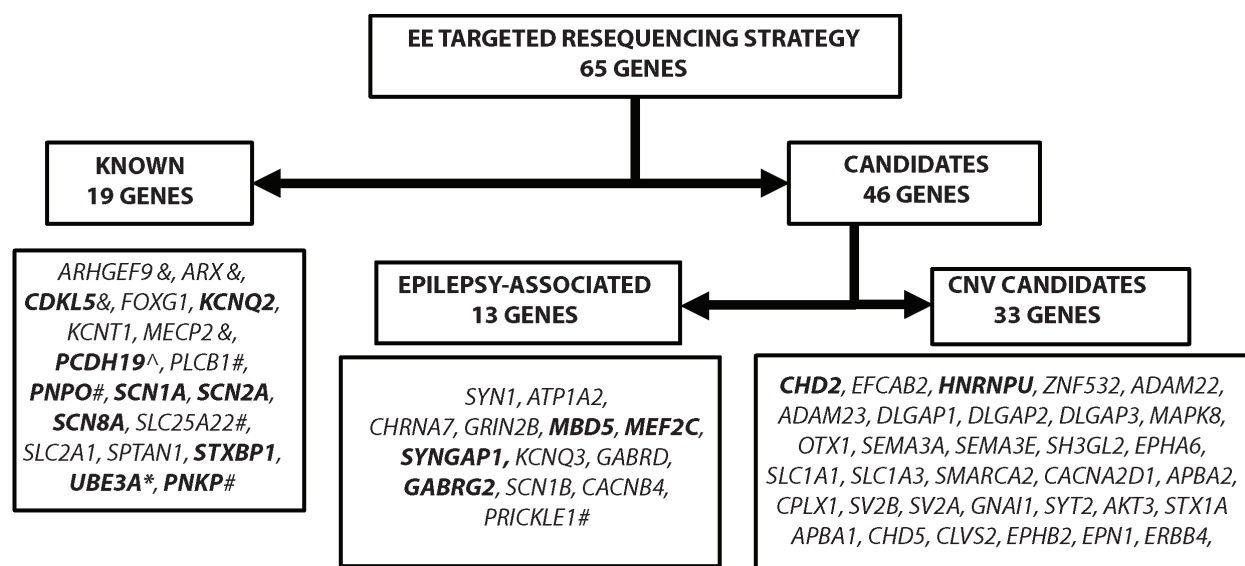

**Supplementary Figure 1 Targeted resequencing strategy carried out in 500 patients with epileptic encephalopathy.** Disease gene identification was conducted under a *de novo*/dominant inheritance model, except for #recessive, &X-linked recessive, ^X-linked but female restricted and \*disruption of maternally expressed (paternally imprinted) genes. Genes in which we identified pathogenic variants appear in bold.

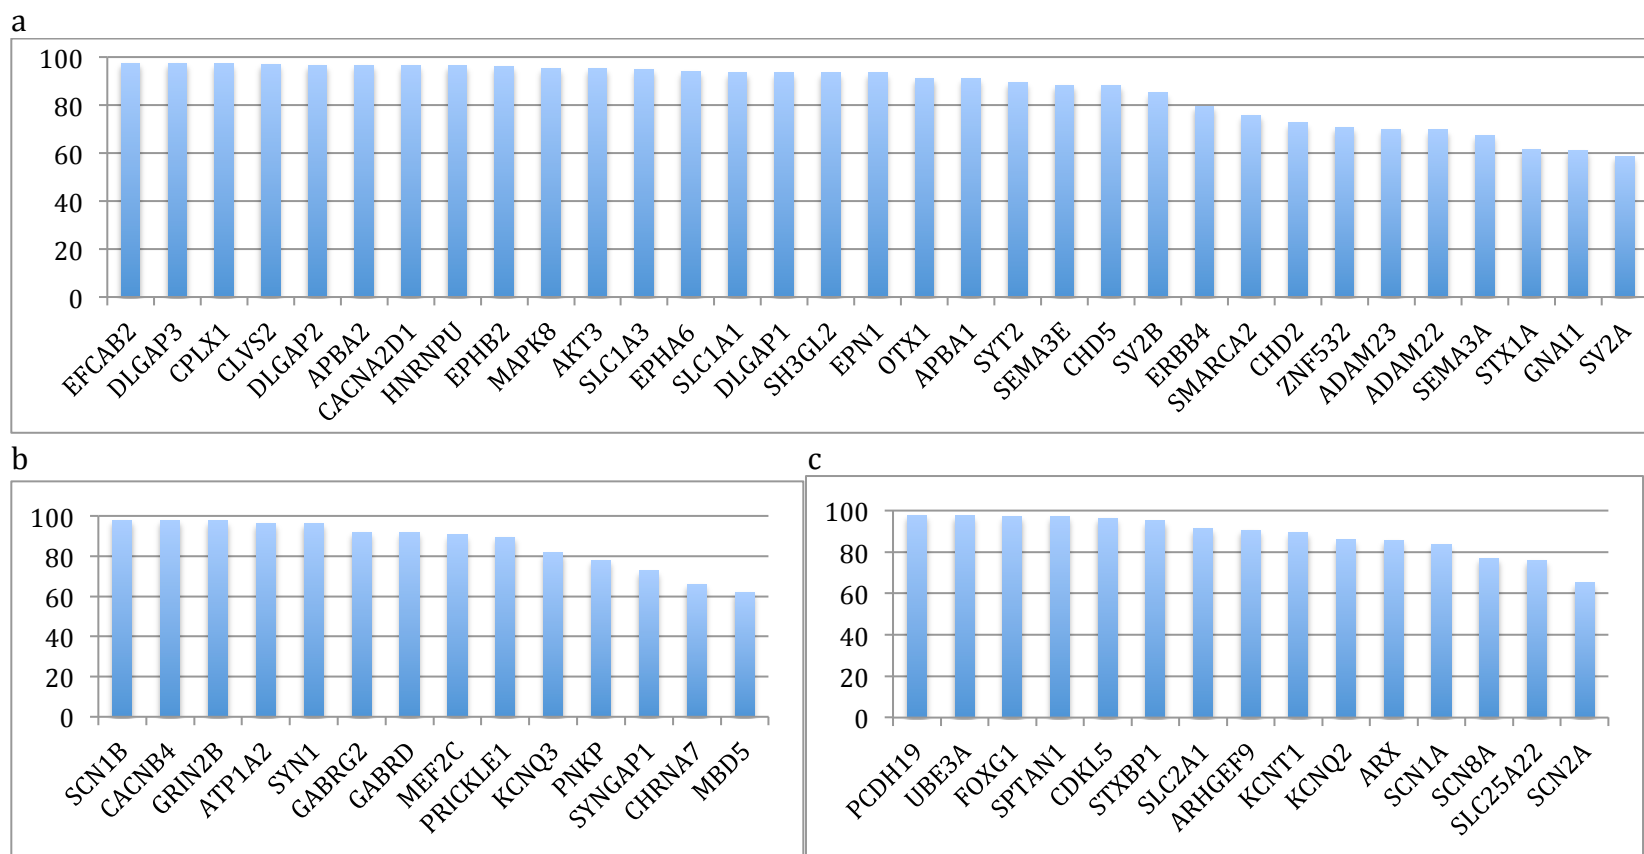

**Supplementary Figure 2** Percentage of target gene resequenced at >25X for a) CNV candidate genes b) epilepsy-associated genes and c) known epileptic encephalopathy genes. GATK Depth of Coverage tool was used to calculate the percentage of exonic bases (and 5bp flanking) covered at >25X in each sample for each gene. The average coverage across all samples is reported.

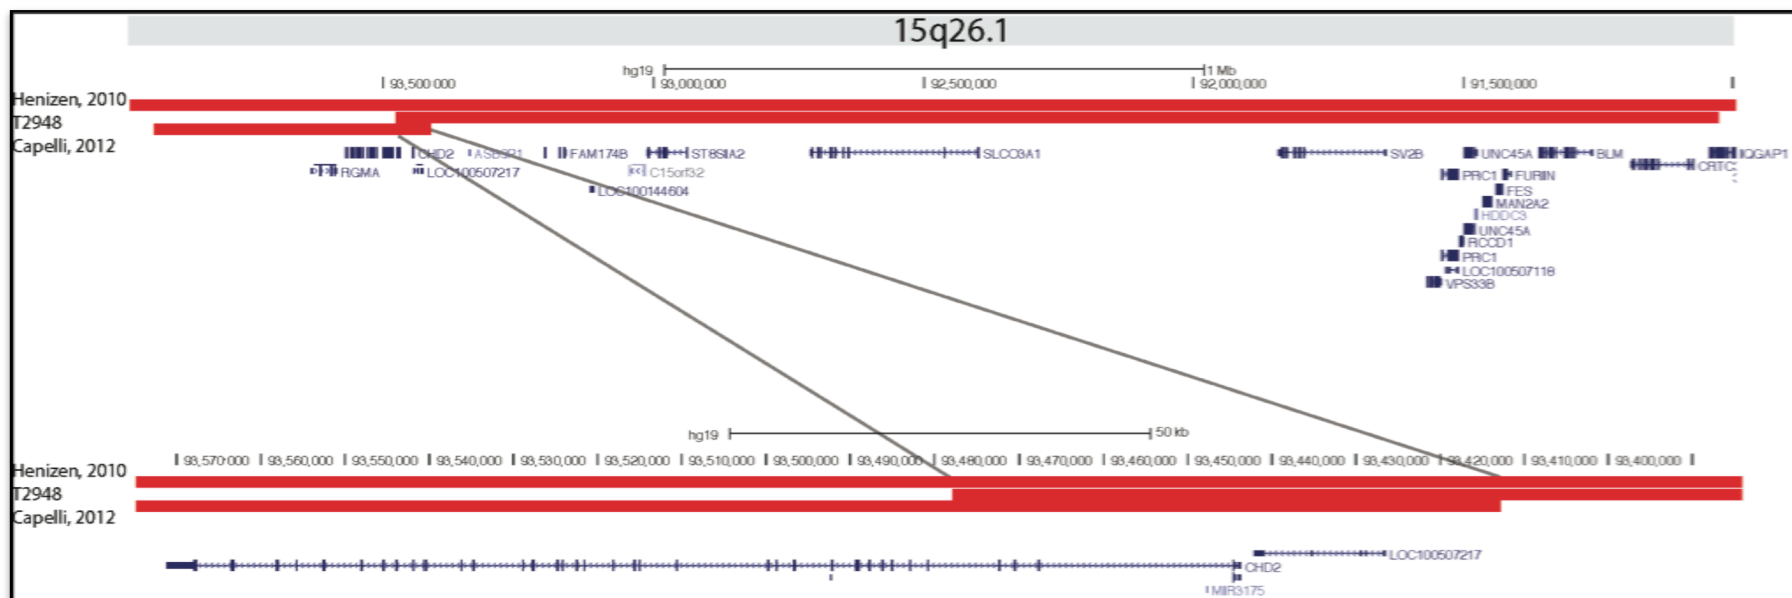

**Supplementary Figure 3** Microdeletions of the 15q26.1 region encompassing *CHD2*. The *CHD2* gene and a uncharacterized non-coding RNA (LOC100507217) were the only two genes common to the two previously reported 15q26del in probands with EE<sup>1,2</sup>, as well as the unpublished deletion we identified in a proband (T2948) with photosensitive generalized early-onset epilepsy and ID. *CHD2* was selected as a candidate gene for mutation screening in our cohort of 500 epileptic encephalopathy probands.

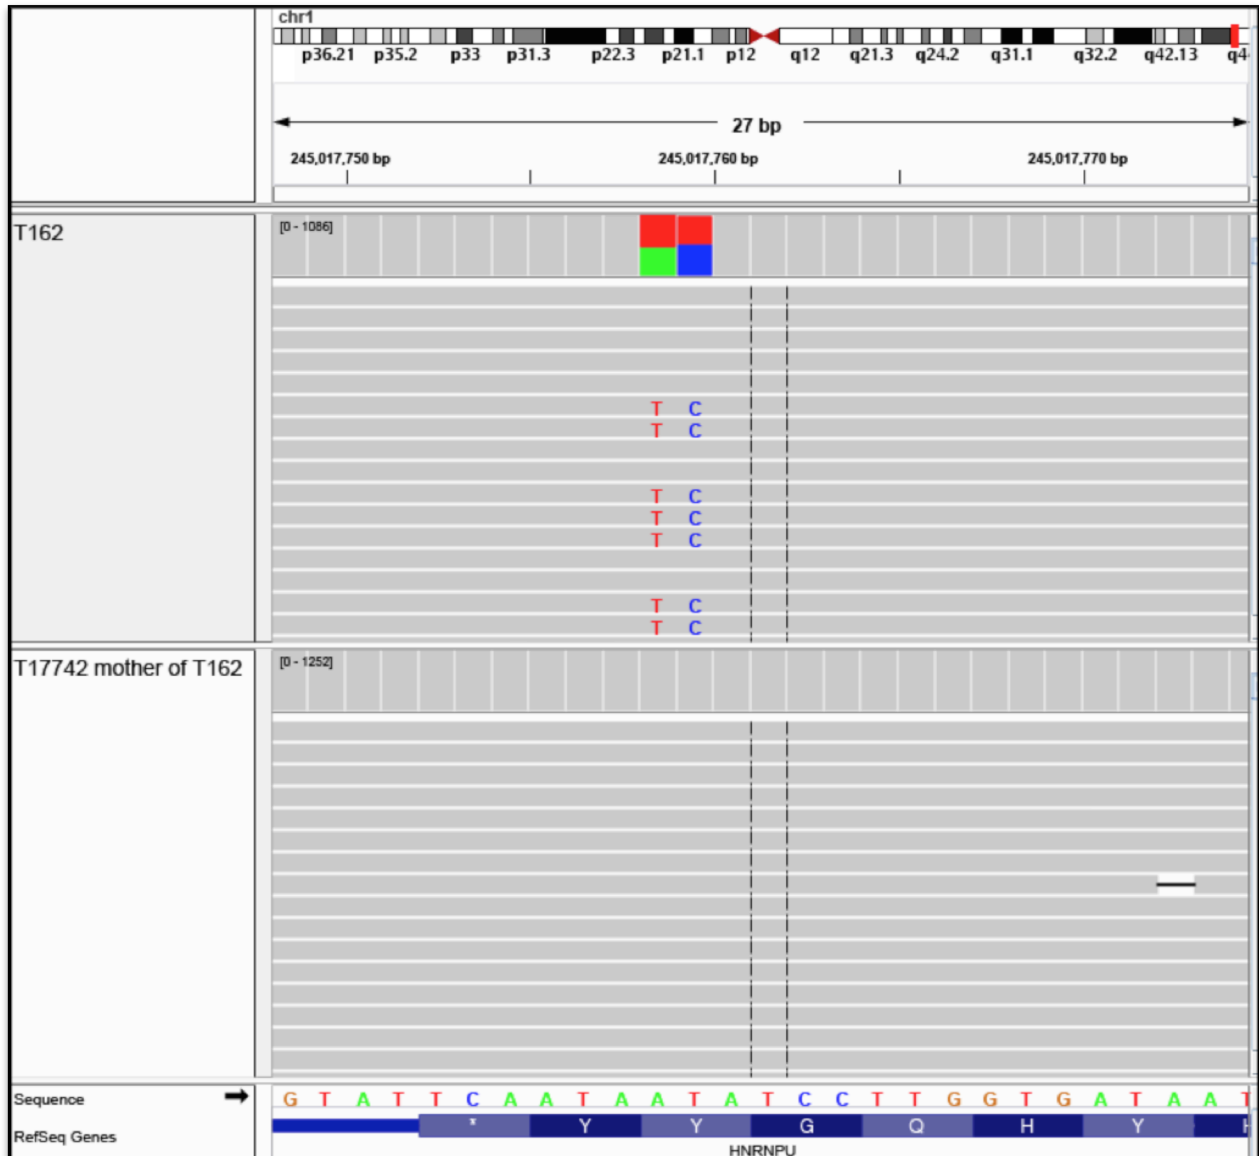

**Supplementary Figure 4** The p.Y805X *HNRNPU* variant in proband T162. Output from the Integrated Genome Viewer (IGV) shows the c.471T>C and c.472A>T in the proband, T162 (top panel). Neither variant was present in the proband's mother T17742 (bottom panel).

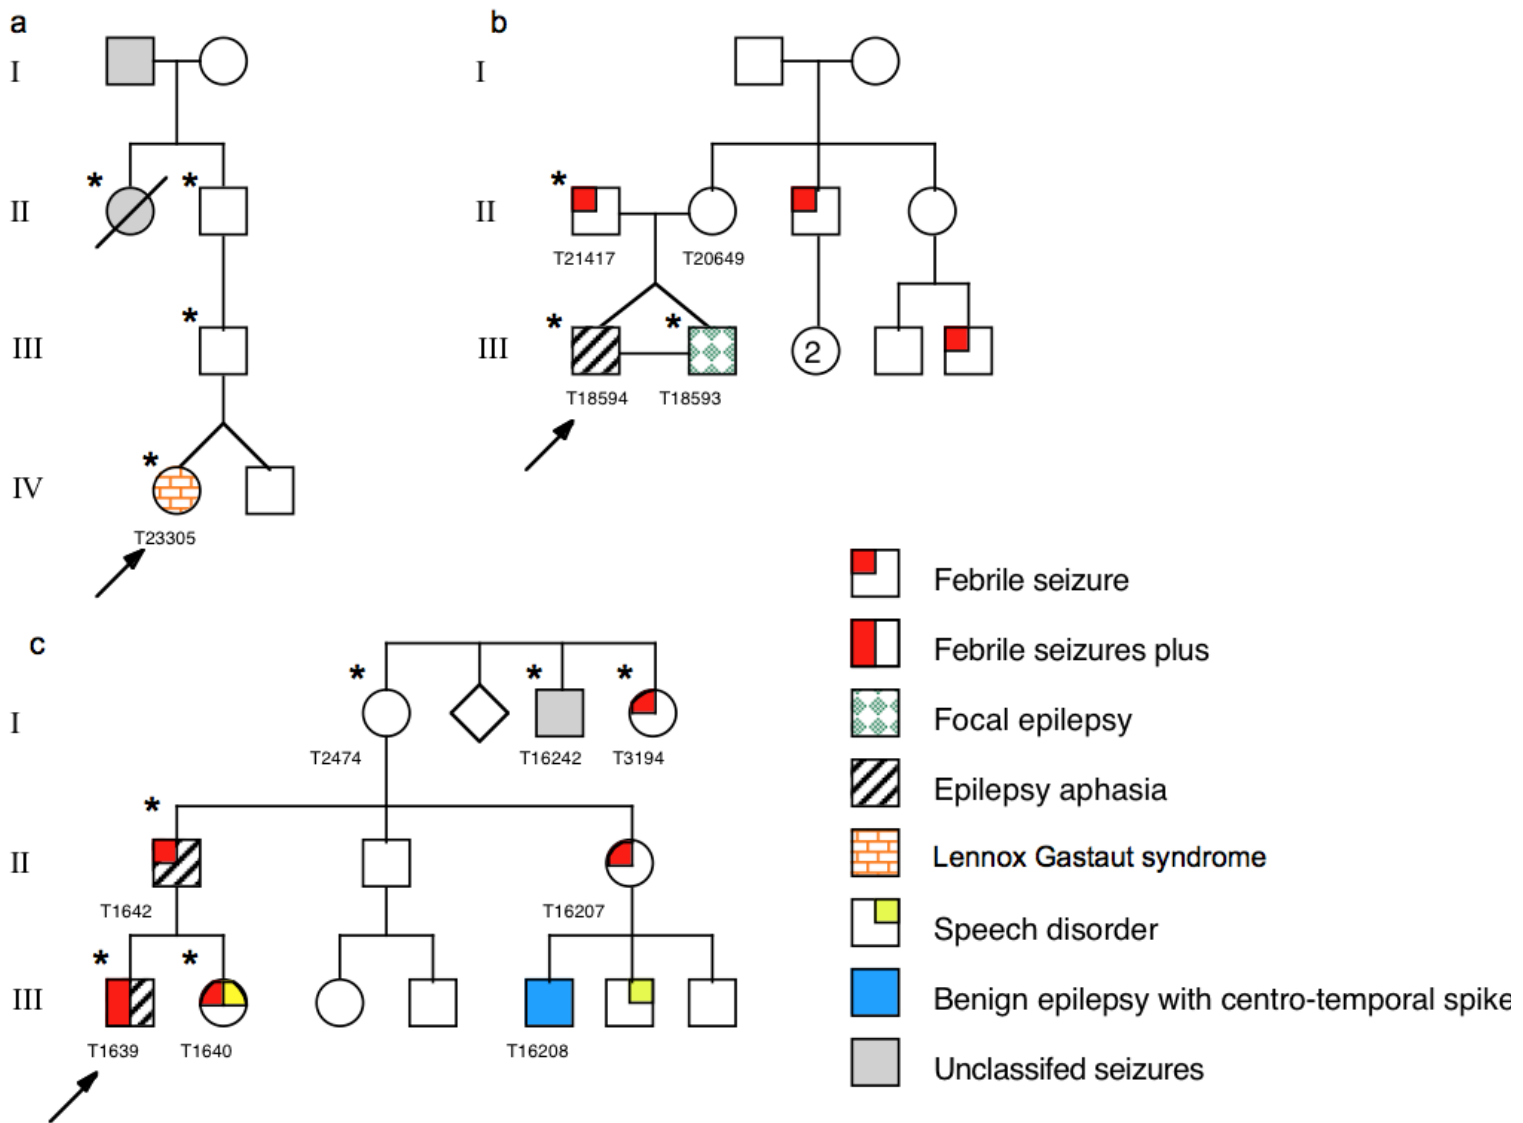

**Supplementary Figure 5** Pedigrees of segregating variants in known EE genes. a) The pedigree showing the *PCDH19* Arg911Gln mutation resulting in the LGS phenotype in the proband and developmental delay and seizures in her paternal great-aunt. Carrier males exhibit no phenotype, as expected for *PCDH19* mutations that cause epilepsy phenotypes in females only. b) The *SCN1A* Asp454Asn variant present in affected monozygotic twins as well as their father with febrile seizures. c) The Arg1988Trp *SCN1A* change in a proband with epilepsy aphasia and febrile seizures plus; the variant segregates with various types of epilepsy with variable expressivity and incomplete penetrance.



**Supplementary Table 1** Potentially disruptive variants in known epileptic encephalopathy genes.

| <b>Proband</b> | <b>Gene</b>  | <b>Position</b> | <b>REF/ALT</b> | <b>c.DNA change</b> | <b>Amino acid change</b> | <b>Inheritance</b> |
|----------------|--------------|-----------------|----------------|---------------------|--------------------------|--------------------|
| <b>T22652</b>  | <i>CDKL5</i> | chrX:18622785   | C/T            | c.1741C>T           | HIS581TYR                | Unk*               |
| <b>T17329</b>  | <i>CDKL5</i> | chrX:18646566   | C/T            | c.2572C>T           | ARG858CYS                | Unk*               |
| <b>T24019</b>  | <i>KCNQ2</i> | chr20:62070961  | G/A            | c.917G>A            | ALA306VAL                | Unk#               |
| <b>T23039</b>  | <i>KCNQ2</i> | chr20:62046399  | T/G            | c.1298T>G           | GLN461PRO                | Unk*               |
| <b>T2542</b>   | <i>KCNT1</i> | chr9:138678206  | G/A            | c.3341G>A           | ARG1114GLN               | Unk*               |
| <b>T16275</b>  | <i>KCNT1</i> | chr9:138677157  | C/A            | c.3158C>A           | PRO1053HIS               | Unk*               |
| <b>T17135</b>  | <i>KCNT1</i> | chr9:138662266  | C/T            | c.1742C>T           | THR581ILE                | Unk*               |
| <b>T2509</b>   | <i>SCN1A</i> | chr2:166929953  | T/C            | c.179T>C            | ASN60SER                 | Unk*               |
| <b>T21732</b>  | <i>SCN1A</i> | chr2:166848590  | G/A            | c.519G>A            | PRO1732LEU               | Unk*               |
| <b>T2529</b>   | <i>SCN1A</i> | chr2:166894315  | T/C            | c.291T>C            | MET973VAL                | Unk*               |
| <b>T22294</b>  | <i>SCN1A</i> | chr2:166909406  | G/A            | c.650G>A            | THR217ILE                | Unk*               |
| <b>T21746</b>  | <i>SCN1A</i> | chr2:166848407  | G/A            | c.945G>A            | THR1793ILE               | Unk*               |
| <b>T23947</b>  | <i>SCN1A</i> | chr2:166900370  | G/A            | c.1852G>A           | ARG618CYS                | Unk*               |
| <b>T2657</b>   | <i>SCN8A</i> | chr12:52115678  | C/T            | c.1984C>T           | ARG662CYS                | Unk#               |
| <b>T20187</b>  | <i>SCN8A</i> | chr12:52200885  | G/A            | c.5492G>A           | ARG1831GLN               | Unk*               |
| <b>T2596</b>   | <i>UBE3A</i> | chr15:25601062  | G/C            | c.2110G>C           | PRO704ALA                | Unk*               |

# father or \* neither parent available for segregation analysis

**Supplementary Note:** Candidate gene selection from epilepsy-associated CNVs

We considered all genes encompassed by 138 unique epilepsy-associated CNVs either from published cohorts, case reports or unpublished data<sup>2-4</sup>. These CNVs encompassed 1309 genes, we selected only those that were expressed in the brain (n=705). These 705 'candidate genes' were prioritized based on a number of criteria. Firstly, we compared overlapping CNVs, and defined a critical interval. For a small number of genomic regions, only one or two genes were encompassed by the overlapping intervals, and these were prioritized (n=4) (Sup Table 2) . Over larger genomic intervals that were not amenable to mapping, we performed a thorough literature search of genes in the region and applied bioinformatics tools for candidate gene prioritization, using the bioinformatics tools, ToppGene Suite<sup>5</sup>, Endeavour<sup>6</sup>, String<sup>7</sup> and the Ingenuity Pathway Analysis software (IPA) (see URLs). The ToppGene and Endeavour tools were used to rank candidate genes based on similarity to a training set of known epilepsy genes (n=115, see list below) using default settings. The ToppNet tool, was used to rank candidate genes based on relationships to a protein-protein interaction networks, also generated from the training set of genes. String was used to generate protein-protein interaction networks between the candidate and training set genes, using a high confidence threshold (0.700). Similarly, pathway analysis was conducted using IPA, with both sets of genes. Candidate genes that were consistently ranked as 'high priority' by ranking tools and/or those that were enriched within protein-protein interaction networks and canonical pathways were prioritized. Furthermore, we performed an intersection between candidate genes and those within the Mouse Genome Informatics (MGI) database that were known to generate phenotypes affecting the 'nervous system'. Finally, genes with a high burden of truncating variants in the ESP6500 (see URLs) control dataset were not selected. Using this tiered prioritization strategy, a total of 18 genes were selected for targeted resequencing. We also selected five genes that were members of the same gene family as a CNV candidate gene (homology to CNV candidate). Finally, literature searches resulted in the inclusion of six additional genes that were hypothesized as candidate genes based on function and/or animal models (literature candidate).

ToppGene Suite :<http://toppgene.cchmc.org/>

Endeavour: <http://homes.esat.kuleuven.be/~bioiuser/endeavour/index.php>

String: <http://string-db.org/>

MGI: [http://www.informatics.jax.org/searches/allele\\_form.shtml](http://www.informatics.jax.org/searches/allele_form.shtml)

**List of training set genes:** *ABAT, ABCC8, ABCD1, ACOX1, ADSL, AGTR2, ALDH3A2, ALDH4A1, ALDH5A1, ALDH7A1, ALG12, ALG2, ALG6, AMT, ARG1, ARHGEF9, ARX, ATN1, ATP1A2, ATP6, ATP6AP2, ATP7A, ATRX, BRD2, C3, CACNA1A, CACNA1H, CACNB4, CASR, CDKL5, CHRNA2, CHRNA4, CHRN2, CLCN2, CLN3, CLN8, CRH, CSTB, D2HGDH, DCX, EFHC1, ELP4, EPM2A, FLNA, FMR1, GABRA1, GABRD, GABRG2, GDI1, GFAP, GK, GPR98, GRIA3, GRIN2A, GRIN2B, HCN1, HCN2, IDS, IMPA2, KCNA1, KCNJ11, KCNMA1, KCNQ2, KCNQ3, KCTD7, KDM5C, LGI1, LGI2, MAGI2, ME2, MECP2, MED12, MEF2C, NHLRC1, OPHN1, OTC, PCDH19, PDHA1, PGK1, PHF6, PLCB1, POLG, PRICKLE1, RELN, SCARB2, SCN1A, SCN1B, SCN2A, SCN9A, SERPINI1, SEZ6, SHROOM4, SLC25A22, SLC2A1, SLC6A8, SLC9A9, SMC1A, SMS, SPTAN1, SRPX2, ST3GAL5, STRADA, STXBP1, SYN1, SYP, TBC1D24, TCF4, TRNK, TRNS1, TSC1, TSC2, TUBA1A, UBE3A, YWHAE, ZEB2*

**Supplementary Table 2** Candidate gene selection details

|     | <b>Gene</b>     | <b>Genomic Location</b> | <b>CNV Type</b> | <b>Rationale</b>                      | <b>References</b> |
|-----|-----------------|-------------------------|-----------------|---------------------------------------|-------------------|
| 1.  | <i>CHD2</i>     | 15q26.1                 | Del             | Critical interval                     | 1-3               |
| 2.  | <i>EFCAB2</i>   | 1q44                    | Del             | Critical interval                     | 3                 |
| 3.  | <i>HNRNPU</i>   | 1q44                    | Del             | Critical interval                     | 3,8               |
| 4.  | <i>ZNF532</i>   | 18q21.32                | Del             | Only gene in interval                 | Unpublished       |
| 5.  | <i>ADAM22</i>   | 7q21.12                 | Del             | ToppNett, IPA, MGI                    | 2                 |
| 6.  | <i>ADAM23</i>   | 2q33.3                  | Del             | Endeavour, IPA, MGI                   | 3                 |
| 7.  | <i>DLGAP1</i>   | 18p11.31                | Del             | ToppNett, String                      | 2                 |
| 8.  | <i>DLGAP2</i>   | 8p23.3                  | none            | Homology to CNV candidates            |                   |
| 9.  | <i>DLGAP3</i>   | 1p34.3                  | Dup             | ToppNett, String                      | Unpublished       |
| 10. | <i>MAPK8</i>    | 10q11.22                | Del             | ToppNett, String, MGI                 | 2                 |
| 11. | <i>OTX1</i>     | 2p15                    | Del             | Literature candidate                  | 3                 |
| 12. | <i>SEMA3A</i>   | 7q21.11                 | Del             | IPA, MGI                              | 2                 |
| 13. | <i>SEMA3E</i>   | 7q21.11                 | Del             | IPA, MGI                              | 2,3               |
| 14. | <i>SH3GL2</i>   | 9p22.2                  | Del/Dup         | Endeavour, ToppNett, String           | Unpublished       |
| 15. | <i>EPHA6</i>    | 1q44                    | Del/Dup         | String, IPA                           | 2,3               |
| 16. | <i>SLC1A1</i>   | 9q24.2                  | Del             | ToppGene, Endeavour                   | 2,3               |
| 17. | <i>SLC1A3</i>   | 5p13.2                  | Del             | ToppGene, Endeavour                   | 3                 |
| 18. | <i>SMARCA2*</i> | 9q24.3                  | Del/Dup         | Endeavour, ToppNett, String           | 2,3               |
| 19. | <i>CACNA2D1</i> | 7q21.1                  | Del             | ToppGene, Endeavour, String           | 2,3               |
| 20. | <i>APBA2</i>    | 15q13.1                 | Del             | String, TopNett, MGI, Endeavour       | 3                 |
| 21. | <i>CPLX1</i>    | 4p16.3                  | Del             | ToppGene                              | 3                 |
| 22. | <i>SV2B</i>     | 15q26.1                 | Del             | ToppGene, Endeavour                   | 2,3               |
| 23. | <i>SV2A</i>     | 1q21.2                  | none            | Homology to CNV candidates            |                   |
| 24. | <i>GNAI1</i>    | 7q21.11                 | Del             | ToppNett, String, MGI, IPA, Endeavour | 2,3               |
| 25. | <i>SYT2</i>     | 1q32.1                  | Dup             | MGI                                   | 3                 |
| 26. | <i>AKT3</i>     | 1q44                    | Del             | Candidate from literature             | 9                 |
| 27. | <i>APBA1</i>    | 9q21.11                 |                 | Homology to CNV candidates            |                   |
| 28. | <i>CHD5</i>     | 1p36.31                 | Del             | Homology to CNV candidates            |                   |
| 29. | <i>CLVS2</i>    | 6p22.31                 |                 | Literature candidate                  | 10                |
| 30. | <i>EPHB2</i>    | 1p36.12                 |                 | Homology to CNV candidates            | 11                |
| 31. | <i>EPN1</i>     | 9q13.42                 |                 | Literature candidate                  | 12                |
| 32. | <i>ERBB4</i>    | 2q34                    |                 | Literature candidate                  | 13                |
| 33. | <i>STX1A</i>    | 7q11.23                 |                 | Literature candidate                  | 14                |

IPA, Ingenuity Pathway Analysis software; MGI, Mouse Genome Informatics

\*SMARCA2 mutations have since been shown to cause Nicolaides Baraitser syndrome<sup>15</sup>, SMARCA2 was selected as a CNV candidate gene prior to this publication. Similarly mutations in AKT3 have been shown to cause hemimegalencephaly<sup>16</sup>.

Supplementary Table 3 Details of molecular inversion probes used to capture 65 target genes

| MIP_name | 70 mer sequence                                                        |
|----------|------------------------------------------------------------------------|
| GABRD_2  | cggggtccgcgcaacttggctcCTTCAGCTTCCCGATATCCGACGGTAGTGTcaccgccccgacccc    |
| GABRD_1  | cgcggggtcggggcggtggCTTCAGCTTCCCGATATCCGACGGTAGTGTtagccaagtgtgcccggacc  |
| GABRD_3  | gctacgcccgcaacttccggCTTCAGCTTCCCGATATCCGACGGTAGTGTgtggaattaaattaagtct  |
| GABRD_4  | gctatcagccgtccaggttggCTTCAGCTTCCCGATATCCGACGGTAGTGTgcttagagccagcctac   |
| GABRD_5  | catggtaggtgccaccagcctctCTTCAGCTTCCCGATATCCGACGGTAGTGTggtccatctgtggctcc |
| GABRD_6  | gcctctgagatgtggtcgatCTTCAGCTTCCCGATATCCGACGGTAGTGTgtgtactcctgtggagggtg |
| GABRD_7  | gtggctgcccgaacactctcCTTCAGCTTCCCGATATCCGACGGTAGTGTcggcccctgtccacctc    |
| GABRD_8  | ccagggtctcgttgggtggttCTTCAGCTTCCCGATATCCGACGGTAGTGTgatcacgctgtcgggc    |
| GABRD_9  | gaaaagctcgagcggcttctgcCTTCAGCTTCCCGATATCCGACGGTAGTGTagaacaagctatccggc  |
| GABRD_11 | gaggccagcctcccgaagcCTTCAGCTTCCCGATATCCGACGGTAGTGTacaccactcacagctctc    |
| GABRD_10 | ggggcttccagcagtgatgCTTCAGCTTCCCGATATCCGACGGTAGTGTcactgcatctgtctt       |
| GABRD_13 | gctctccgaccagtagtagacgatCTTCAGCTTCCCGATATCCGACGGTAGTGTggcacatcggaagg   |
| GABRD_12 | gttcaccatcaccagctaccCTTCAGCTTCCCGATATCCGACGGTAGTGTcggggcaggcgggctctg   |
| GABRD_14 | caatctacatgccctcctcCTTCAGCTTCCCGATATCCGACGGTAGTGTcctgagtcctatggttgg    |
| GABRD_15 | cagggtgaagtgcaggctgagcCTTCAGCTTCCCGATATCCGACGGTAGTGTgaggccccctacatagag |
| GABRD_16 | ggggctcagcactggcctctgCTTCAGCTTCCCGATATCCGACGGTAGTGTgtcctggctctctctg    |
| GABRD_18 | atcgtcagcaccgtggtgatgCTTCAGCTTCCCGATATCCGACGGTAGTGTgaaatgagcaaggcgta   |
| GABRD_17 | aaggcactggaactctctctgCTTCAGCTTCCCGATATCCGACGGTAGTGTgatggggcggcgtgag    |
| GABRD_19 | gccagggacagcactctgaCTTCAGCTTCCCGATATCCGACGGTAGTGTatctgtatgtctctgtt     |
| GABRD_20 | gccagggacagcactctgCTTCAGCTTCCCGATATCCGACGGTAGTGTatctgtatgtctctgtt      |
| GABRD_22 | cagcagagagggagaaggagcaCTTCAGCTTCCCGATATCCGACGGTAGTGTtctgagcggctgcc     |
| GABRD_21 | acctgatgggctcctcaggtcCTTCAGCTTCCCGATATCCGACGGTAGTGTcagcctgtctccccca    |
| GABRD_23 | gttgcggcgtcaatgtctcCTTCAGCTTCCCGATATCCGACGGTAGTGTgggtggagacagggaga     |
| GABRD_24 | agcgcggcgtaaatgtcaCTTCAGCTTCCCGATATCCGACGGTAGTGTcttctccaggaaatttct     |
| CHD5_499 | cgagactcctctgttgcCTTCAGCTTCCCGATATCCGACGGTAGTGTtatgtgaccgtagtgccc      |
| CHD5_500 | gtacatctgggaggagcgaagcCTTCAGCTTCCCGATATCCGACGGTAGTGTgaccctgtgatgc      |
| CHD5_501 | gcaacaacttgggccaactctcCTTCAGCTTCCCGATATCCGACGGTAGTGTctcggctgtgtgcc     |
| CHD5_503 | ggctgcagatgtcggagcgcCTTCAGCTTCCCGATATCCGACGGTAGTGTcatcctgtctcaccatc    |
| CHD5_502 | gcagccgggtcacgtggcctCTTCAGCTTCCCGATATCCGACGGTAGTGTggggcacacagggcagc    |
| CHD5_504 | cagggtgtggtgctctcggcCTTCAGCTTCCCGATATCCGACGGTAGTGTccctatctacagcaaga    |
| CHD5_505 | ccaaggagtccctgtctgggaCTTCAGCTTCCCGATATCCGACGGTAGTGTgttgctattgaggagcag  |
| CHD5_506 | caccagcagcgaagctcccCTTCAGCTTCCCGATATCCGACGGTAGTGTgtcatgttcaggtagcggc   |
| CHD5_507 | gatcatgtaccgtggctcattctCTTCAGCTTCCCGATATCCGACGGTAGTGTaccgtccctcctgcc   |
| CHD5_508 | ccctcaagtctgaggtccacaaCTTCAGCTTCCCGATATCCGACGGTAGTGTgagctcctcccctac    |
| CHD5_510 | gtgacgtatccttggcaggccCTTCAGCTTCCCGATATCCGACGGTAGTGTcctgtcaccttggcttg   |
| CHD5_509 | atthccagaggatacagcagcCTTCAGCTTCCCGATATCCGACGGTAGTGTctctcagaggctctc     |
| CHD5_511 | gtttcaatgggctcctctcctCTTCAGCTTCCCGATATCCGACGGTAGTGTctctgcccaccccc      |
| CHD5_512 | agcaaaatggtgacaaaggaagCTTCAGCTTCCCGATATCCGACGGTAGTGTctcctgggtccccgt    |
| CHD5_513 | cctctgcaaaaaagagggtcCTTCAGCTTCCCGATATCCGACGGTAGTGTggaccatggggcacagg    |
| CHD5_514 | ggtgtctctgagaaggagaagCTTCAGCTTCCCGATATCCGACGGTAGTGTggcacctgtggactct    |
| CHD5_515 | gcttgctcactctcactctaCTTCAGCTTCCCGATATCCGACGGTAGTGTacatggcactgggggtg    |
| CHD5_516 | gagaggagcggcagaggagcCTTCAGCTTCCCGATATCCGACGGTAGTGTccctcctctctgtag      |
| CHD5_518 | gcctgtggtgtgtggggctCTTCAGCTTCCCGATATCCGACGGTAGTGTgtctcagctcttcccttg    |
| CHD5_517 | atcaaggaaaagagctgagacaCTTCAGCTTCCCGATATCCGACGGTAGTGTaccacacacaccacag   |
| CHD5_519 | ggggtccaggagatcactcCTTCAGCTTCCCGATATCCGACGGTAGTGTtagactagggtttctgtga   |
| CHD5_520 | acctcctccagccccgctCTTCAGCTTCCCGATATCCGACGGTAGTGTtaggtcaggagtttagcat    |
| CHD5_521 | aagtgtcacaggcttgggtagCTTCAGCTTCCCGATATCCGACGGTAGTGTggtgctgacttcccgtt   |
| CHD5_522 | gctcacacaggtgccgatgaCTTCAGCTTCCCGATATCCGACGGTAGTGTccctacagaggtactca    |
| CHD5_523 | ggcggatggtgcagacactCTTCAGCTTCCCGATATCCGACGGTAGTGTtaggattccccggggtc     |
| CHD5_524 | gttcagaaaggcctccgctgCTTCAGCTTCCCGATATCCGACGGTAGTGTtaggtgtcacacctggg    |
| CHD5_525 | ccccgcagagcctcaactCTTCAGCTTCCCGATATCCGACGGTAGTGTcatcccgaatccctcacc     |
| CHD5_527 | cctgtcttcccgatctctCTTCAGCTTCCCGATATCCGACGGTAGTGTcccactgaggaactgt       |
| CHD5_526 | cagttcctcaggtgggagcccagCTTCAGCTTCCCGATATCCGACGGTAGTGTgcggaacagacaggc   |
| CHD5_529 | cagtttagtggctgggctactCTTCAGCTTCCCGATATCCGACGGTAGTGTcgtgccctctgtctg     |
| CHD5_528 | acagaggggacggagtgagctCTTCAGCTTCCCGATATCCGACGGTAGTGTtagaccactaacactgaga |
| CHD5_530 | gttcgggacaggtcctcctgCTTCAGCTTCCCGATATCCGACGGTAGTGTgacagaatcctccccac    |
| CHD5_531 | gcaagcaggtcaactacaacgatCTTCAGCTTCCCGATATCCGACGGTAGTGTtaggtgagcgggaaatc |
| CHD5_532 | acctgacctgcccttggccccCTTCAGCTTCCCGATATCCGACGGTAGTGTtcccagtagtggggtcc   |
| CHD5_533 | gtgtcatctgtagcctcgttctCTTCAGCTTCCCGATATCCGACGGTAGTGTggctcggatggaggg    |
| CHD5_534 | cagaaatgaacgagtacctgagCTTCAGCTTCCCGATATCCGACGGTAGTGTcacactgcatctgctg   |
| CHD5_535 | ccctgagacatgctcgtgagCTTCAGCTTCCCGATATCCGACGGTAGTGTggaggagctgaggctgg    |

|           |                                                                        |
|-----------|------------------------------------------------------------------------|
| CHD5_536  | cggtcacacccatccctgatCTTCAGCTTCCCGATATCCGACGGTAGTGTctgtatctctgcttagga   |
| CHD5_537  | caggtgggtgagcatcatcttgcCTTCAGCTTCCCGATATCCGACGGTAGTGTgctccctcggaacagag |
| CHD5_538  | gggtccatgaccaagcaggagCTTCAGCTTCCCGATATCCGACGGTAGTGTgcccagaacaagaagtgat |
| CHD5_539  | catgagctcaagagcatggaatCTTCAGCTTCCCGATATCCGACGGTAGTGTagtccagaagcggtagat |
| CHD5_540  | gtggccaggttgatgccagaCTTCAGCTTCCCGATATCCGACGGTAGTGTgcatgaaggagacaactg   |
| CHD5_541  | ggactggaacccgcacaatgacCTTCAGCTTCCCGATATCCGACGGTAGTGTaaacactccatctctg   |
| CHD5_542  | gtccagcatcttggtcatctgcCTTCAGCTTCCCGATATCCGACGGTAGTGTaatcagaaccttgggca  |
| CHD5_543  | gactctctggagtacgaaggctaCTTCAGCTTCCCGATATCCGACGGTAGTGTgaggcagctctctct   |
| CHD5_544  | agacttgaccaggagcttccaCTTCAGCTTCCCGATATCCGACGGTAGTGTatctctctgtggggtgt   |
| CHD5_545  | gaagctcatgctgtacagaagaCTTCAGCTTCCCGATATCCGACGGTAGTGTggcccttggtagcaga   |
| CHD5_546  | cagtgctcaaaagtctctgtCTTCAGCTTCCCGATATCCGACGGTAGTGTagaagctgcatatgagc    |
| CHD5_547  | caagggggggggaaccaagatCTTCAGCTTCCCGATATCCGACGGTAGTGTtccagcccactcgag     |
| CHD5_549  | ggagctgagccagatgcagaaCTTCAGCTTCCCGATATCCGACGGTAGTGTgagttgtgacatctcca   |
| CHD5_548  | gttcttgaacagctcagccttgaCTTCAGCTTCCCGATATCCGACGGTAGTGTcctgggaatcgaccag  |
| CHD5_550  | gagcgctagcccctgtaggCTTCAGCTTCCCGATATCCGACGGTAGTGTcatgagcttctgtatctg    |
| CHD5_551  | gtagctgttaagaccctaaaaCTTCAGCTTCCCGATATCCGACGGTAGTGTccactccctagccaga    |
| CHD5_552  | agattgattacaagctgctctCTTCAGCTTCCCGATATCCGACGGTAGTGTgaaacaccagccaaggt   |
| CHD5_553  | ggtgagcagcacgtggaattgatCTTCAGCTTCCCGATATCCGACGGTAGTGTggggctgaggccag    |
| CHD5_554  | ccatcctgggctccatcgagtCTTCAGCTTCCCGATATCCGACGGTAGTGTgtctctggactgtgat    |
| CHD5_556  | gagtttctcttgaggacaacgcCTTCAGCTTCCCGATATCCGACGGTAGTGTccctactggttagcgc   |
| CHD5_555  | cacgtagaagtcggggcccaCTTCAGCTTCCCGATATCCGACGGTAGTGTtcttccaagatagcgag    |
| CHD5_560  | gcctttgcacatgcaattcttctCTTCAGCTTCCCGATATCCGACGGTAGTGTgtacgggtcagtgctc  |
| CHD5_561  | cccagcatcagctccctgggaaaCTTCAGCTTCCCGATATCCGACGGTAGTGTaccaccactgctctc   |
| CHD5_562  | aagacaccaggctgccaaagaggCTTCAGCTTCCCGATATCCGACGGTAGTGTcaggcctactggggcca |
| CHD5_563  | cacttgatcaggtagtgacatccCTTCAGCTTCCCGATATCCGACGGTAGTGTgctctgtgcttagcag  |
| CHD5_564  | gtgcactgggagatcgatgacCTTCAGCTTCCCGATATCCGACGGTAGTGTaggctccctatcaaac    |
| CHD5_565  | catcttggcatagggggctctCTTCAGCTTCCCGATATCCGACGGTAGTGTcaaaagactgagctgg    |
| CHD5_566  | cgcttctaccgctatggcatCTTCAGCTTCCCGATATCCGACGGTAGTGTgtgatgtatgcacactaca  |
| CHD5_567  | agaaggagatggggcatggtcCTTCAGCTTCCCGATATCCGACGGTAGTGTctcttggccttctatcc   |
| CHD5_568  | ccctcaggggcttaggtggagCTTCAGCTTCCCGATATCCGACGGTAGTGTtccagggctaccaggtc   |
| CHD5_569  | ccctgagagagagtcttgtcaCTTCAGCTTCCCGATATCCGACGGTAGTGTcccactgaaggcaaaag   |
| CHD5_570  | cctccatcagtgccactgccCTTCAGCTTCCCGATATCCGACGGTAGTGTtccagtgagaatcgctg    |
| CHD5_571  | ccccgtcttgacacgcggcaCTTCAGCTTCCCGATATCCGACGGTAGTGTcggggcgggcggaaca     |
| CHD5_572  | cgagctgctctgctgcagcCTTCAGCTTCCCGATATCCGACGGTAGTGTggcctctccccaggaga     |
| CHD5_573  | ccccaaatgaggcacagggtCTTCAGCTTCCCGATATCCGACGGTAGTGTcgtctctcgctccac      |
| CHD5_574  | cctgctggcacactcacagtaatCTTCAGCTTCCCGATATCCGACGGTAGTGTcgggctctgccaagg   |
| CHD5_575  | gggagatcatcctgtgcacacCTTCAGCTTCCCGATATCCGACGGTAGTGTcagtgagttggtgtgt    |
| CHD5_577  | gaatgctctgcagccctgggcaaCTTCAGCTTCCCGATATCCGACGGTAGTGTgggccaagcaagccttc |
| CHD5_577  | gaatgctctgcagccctgggcaaCTTCAGCTTCCCGATATCCGACGGTAGTGTgggccaagcaagccttc |
| CHD5_576  | ccttctatcttctcactctgcCTTCAGCTTCCCGATATCCGACGGTAGTGTaactctctggaaggag    |
| CHD5_578  | catctttggagccttctcttCTTCAGCTTCCCGATATCCGACGGTAGTGTatgcatgcaaatgcacac   |
| CHD5_578  | catctttggagccttctcttCTTCAGCTTCCCGATATCCGACGGTAGTGTatgcatgcaaatgcacac   |
| CHD5_579  | gaagaaaaaggcaaaaggaaaaCTTCAGCTTCCCGATATCCGACGGTAGTGTattgggtaaccgagagc  |
| CHD5_579  | gaagaaaaaggcaaaaggaaaaCTTCAGCTTCCCGATATCCGACGGTAGTGTattgggtaaccgagagc  |
| CHD5_580  | gatggtgaccgtctctacagccCTTCAGCTTCCCGATATCCGACGGTAGTGTaaaggaccctctccag   |
| CHD5_581  | cccctccgtagccgtcagcCTTCAGCTTCCCGATATCCGACGGTAGTGTtcccatgtccaaaatgatg   |
| CHD5_582  | gagatgagagccaccgaccCTTCAGCTTCCCGATATCCGACGGTAGTGTtctgtggcctgaactcc     |
| CHD5_584  | acgactggactactgttctctCTTCAGCTTCCCGATATCCGACGGTAGTGTcaaagcctctagcaga    |
| CHD5_583  | ggacttggctcctacagagcccCTTCAGCTTCCCGATATCCGACGGTAGTGTcagccttagtccccg    |
| CHD5_585  | ggctttttctcttctgtcCTTCAGCTTCCCGATATCCGACGGTAGTGTagaacatacaggaagagg     |
| CHD5_586  | gaaggatgaggatgaggatgaCTTCAGCTTCCCGATATCCGACGGTAGTGTaatgatgagctacagaga  |
| CHD5_587  | cagagtctgggtggcaggaCTTCAGCTTCCCGATATCCGACGGTAGTGTttttattggggagtagtcac  |
| CHD5_588  | acagggaaaaagtcaggaagctCTTCAGCTTCCCGATATCCGACGGTAGTGTcaaccaccgcccc      |
| CHD5_589  | cgtagccttctaagaagaagaCTTCAGCTTCCCGATATCCGACGGTAGTGTcagggtgctctgtgt     |
| CHD5_591  | cggggcgcggtgctcctggggcCTTCAGCTTCCCGATATCCGACGGTAGTGTcggggaggggggcg     |
| CHD5_590  | cgccccctcccggggcgcCTTCAGCTTCCCGATATCCGACGGTAGTGTaggcgaccgcgccccg       |
| EPHB2_638 | cgctccccgggctcggggcgcCTTCAGCTTCCCGATATCCGACGGTAGTGTcggcgccctgtccc      |
| EPHB2_637 | gggcacggggcgcgcgctcCTTCAGCTTCCCGATATCCGACGGTAGTGTcgaaggccccgggaagcg    |
| EPHB2_640 | cacctaccaggcctgtcaatCTTCAGCTTCCCGATATCCGACGGTAGTGTgaccaatgcaaggttggg   |
| EPHB2_639 | ggtcccaaaccttgactgctCTTCAGCTTCCCGATATCCGACGGTAGTGTgattgacagcctggtta    |
| EPHB2_641 | actggctacggaccaagttatctCTTCAGCTTCCCGATATCCGACGGTAGTGTgctgagccttacctc   |
| EPHB2_642 | gttctgcttactcaaacagcCTTCAGCTTCCCGATATCCGACGGTAGTGTtagaggtgaaagttctct   |
| EPHB2_644 | gagtcaagtgcagcctcatgtaaCTTCAGCTTCCCGATATCCGACGGTAGTGTccgcacctggtgtt    |
| EPHB2_643 | catgggtgaaggtggatccatCTTCAGCTTCCCGATATCCGACGGTAGTGTaagtttctggtcgtgac   |
| EPHB2_645 | gtgccccgcatcaccagaatCTTCAGCTTCCCGATATCCGACGGTAGTGTggccgctatgaaaa       |

|            |                                                                          |
|------------|--------------------------------------------------------------------------|
| EPHB2_646  | gcggtagaagacacgcacggcCTTCAGCTTCCCGATATCCGACGGTAGTGTgcttgatgggtacatcca    |
| EPHB2_647  | gaggtaaagggccaggggtggggcCTTCAGCTTCCCGATATCCGACGGTAGTGTatcccaatcggaagag   |
| EPHB2_648  | gcagacggtgccattctcaacgCTTCAGCTTCCCGATATCCGACGGTAGTGTctggccctagatgctctc   |
| EPHB2_649  | caatggctactacagagcagCTTCAGCTTCCCGATATCCGACGGTAGTGTgtactctctctgtctctc     |
| EPHB2_650  | cagacacagtgggtggccctCTTCAGCTTCCCGATATCCGACGGTAGTGTcaatctcactctgagctt     |
| EPHB2_652  | catgaggaggctcattgacacCTTCAGCTTCCCGATATCCGACGGTAGTGTgctgtggctgactgta      |
| EPHB2_651  | gtctacaatcatctgcaagagCTTCAGCTTCCCGATATCCGACGGTAGTGTactgaccaacacctctc     |
| EPHB2_653  | accagagcccctctcgcctcCTTCAGCTTCCCGATATCCGACGGTAGTGTcaccgctcgggggacaat     |
| EPHB2_654  | agtaacgcccgttcacagcctggCTTCAGCTTCCCGATATCCGACGGTAGTGTgtgaggactgcaggacc   |
| EPHB2_656  | ggctgggaccacgacagggtaatCTTCAGCTTCCCGATATCCGACGGTAGTGTagaactcccaggccta    |
| EPHB2_655  | gctgcagtactatgagaaggtacCTTCAGCTTCCCGATATCCGACGGTAGTGTctgacctctggcctctc   |
| EPHB2_657  | catctatgtctccaggtgctgCTTCAGCTTCCCGATATCCGACGGTAGTGTggaccactatgagcca      |
| EPHB2_658  | accgtgttggtgggctttttatCTTCAGCTTCCCGATATCCGACGGTAGTGTgctggactctgtcacc     |
| EPHB2_659  | ccttctagatgtcagccctcccCTTCAGCTTCCCGATATCCGACGGTAGTGTtactccagaccatgaca    |
| EPHB2_660  | acaggtgggtggggtctcagCTTCAGCTTCCCGATATCCGACGGTAGTGTaatgcctaccatgcttctc    |
| EPHB2_661  | atggcgtgacaaccacagcaCTTCAGCTTCCCGATATCCGACGGTAGTGTtccctgcattgtgagaa      |
| EPHB2_662  | acagatgtacacaccaagcgCTTCAGCTTCCCGATATCCGACGGTAGTGTactactgtggctcccag      |
| EPHB2_663  | ccactgggtgtagtggcagctCTTCAGCTTCCCGATATCCGACGGTAGTGTcaggcaaccacttgatc     |
| EPHB2_664  | attgagcaggtgacggagcaCTTCAGCTTCCCGATATCCGACGGTAGTGTcatatgacagaccctggct    |
| EPHB2_665  | gacacaggagatgtaattctctCTTCAGCTTCCCGATATCCGACGGTAGTGTgctcctgcccacatc      |
| EPHB2_666  | gacttctgagcgaagcctcCTTCAGCTTCCCGATATCCGACGGTAGTGTgctctcttgggtttctct      |
| EPHB2_667  | gtagcccactgagctctctCTTCAGCTTCCCGATATCCGACGGTAGTGTtccatgaactcggatgaga     |
| EPHB2_668  | cttcatactgcagagcctgaaCTTCAGCTTCCCGATATCCGACGGTAGTGTcaagagcacacctgtgat    |
| EPHB2_669  | gttcacctgactggctgctCTTCAGCTTCCCGATATCCGACGGTAGTGTgctctctgtttactctgt      |
| EPHB2_670  | gttcatgtctccaggtactctatCTTCAGCTTCCCGATATCCGACGGTAGTGTaggcactgggtgtagg    |
| EPHB2_671  | caattgggccaagcactgtccCTTCAGCTTCCCGATATCCGACGGTAGTGTtagaggcagataccagac    |
| EPHB2_672  | gtgatgtcctatggggagcggCTTCAGCTTCCCGATATCCGACGGTAGTGTccacaaccctctcttctc    |
| EPHB2_673  | ccacacatcactggcggaggtCTTCAGCTTCCCGATATCCGACGGTAGTGTatctccctctccatctg     |
| EPHB2_674  | gcccgaattcggcacaattgctCTTCAGCTTCCCGATATCCGACGGTAGTGTactgactcctgactgtg    |
| EPHB2_675  | acagccagcatgagttggtgagCTTCAGCTTCCCGATATCCGACGGTAGTGTgccagggtggggcctt     |
| EPHB2_676  | aaggacaggactagtgtttatggCTTCAGCTTCCCGATATCCGACGGTAGTGTgccctctctctggg      |
| EPHB2_677  | gtacaaggagagcttgcctaatCTTCAGCTTCCCGATATCCGACGGTAGTGTaggctccctgacctctc    |
| EPHB2_678  | ccactctccaccgtgtaagCTTCAGCTTCCCGATATCCGACGGTAGTGTgggggtgctaaagtgaca      |
| EPHB2_680  | gcatcacctggatactgttcaggCTTCAGCTTCCCGATATCCGACGGTAGTGTggccctgagtgatag     |
| EPHB2_679  | gtttgacattcacctgcctcggCTTCAGCTTCCCGATATCCGACGGTAGTGTcctaacacagctctct     |
| ATP1A2_697 | ggcagagtggtgagggaccttCTTCAGCTTCCCGATATCCGACGGTAGTGTatcccactcagctctct     |
| ATP1A2_696 | gagaggagctgagtgatacttCTTCAGCTTCCCGATATCCGACGGTAGTGTtccctcagccactctgc     |
| ATP1A2_698 | ggagaaggaaactggatgagctgaCTTCAGCTTCCCGATATCCGACGGTAGTGTggtgggaatggaggcc   |
| ATP1A2_699 | cattctctgctggtggcggcagCTTCAGCTTCCCGATATCCGACGGTAGTGTcaatgggctgcaggga     |
| ATP1A2_701 | gaaggagggtgagttacttggCTTCAGCTTCCCGATATCCGACGGTAGTGTccaccttgatgctgcat     |
| ATP1A2_700 | catgcagcatcaaggtggcagCTTCAGCTTCCCGATATCCGACGGTAGTGTaagtaactcacctctcctt   |
| ATP1A2_702 | caaccctgagtggtcaagttCTTCAGCTTCCCGATATCCGACGGTAGTGTatggtgactgctgggtt      |
| ATP1A2_703 | ggtggtgtagggcgttgggCTTCAGCTTCCCGATATCCGACGGTAGTGTtggatggtctatcctccat     |
| ATP1A2_704 | accctgaaccccaacacagtgCTTCAGCTTCCCGATATCCGACGGTAGTGTatcctgctggtggtggg     |
| ATP1A2_705 | acctcaggaagatggcaggCTTCAGCTTCCCGATATCCGACGGTAGTGTccttgaactcttctctct      |
| ATP1A2_706 | aatcatgatcttggagctctCTTCAGCTTCCCGATATCCGACGGTAGTGTgatctttctgttcatctc     |
| ATP1A2_707 | aatcatgatcttggagctctCTTCAGCTTCCCGATATCCGACGGTAGTGTgatctttctgtcctatctc    |
| ATP1A2_708 | ggtggaggtgaaagggggagagacCTTCAGCTTCCCGATATCCGACGGTAGTGTgacaggagaagaaggcag |
| ATP1A2_709 | ccaccactctctgctgttatCTTCAGCTTCCCGATATCCGACGGTAGTGTgacacagccttctcctt      |
| ATP1A2_710 | actgtttgagggtgagaagcCTTCAGCTTCCCGATATCCGACGGTAGTGTgactatgactccttctc      |
| ATP1A2_711 | gaaacagatattggggtctccaCTTCAGCTTCCCGATATCCGACGGTAGTGTccaccaatggcagagct    |
| ATP1A2_712 | attgaacacttcatcagctgatCTTCAGCTTCCCGATATCCGACGGTAGTGTctgatccccaccatgt     |
| ATP1A2_713 | ccgccaacccctcaggcctgaCTTCAGCTTCCCGATATCCGACGGTAGTGTatgaggaagatgactcct    |
| ATP1A2_714 | gggtctcactactcttctcaCTTCAGCTTCCCGATATCCGACGGTAGTGTcctctctctctgggcta      |
| ATP1A2_716 | gtcaggcacacctgtagaaaaCTTCAGCTTCCCGATATCCGACGGTAGTGTacggtcatcggttctg      |
| ATP1A2_715 | gaacctggaggcgtggagacCTTCAGCTTCCCGATATCCGACGGTAGTGTgaccacggtctagggtaa     |
| ATP1A2_717 | cagagggggtggataggattagaCTTCAGCTTCCCGATATCCGACGGTAGTGTactccaccatctgctc    |
| ATP1A2_719 | cggttgacagaccagcaattCTTCAGCTTCCCGATATCCGACGGTAGTGTccacatcatgtgagaagga    |
| ATP1A2_718 | gtctaagtaggggtcaggacCTTCAGCTTCCCGATATCCGACGGTAGTGTtctggtccccctcatt       |
| ATP1A2_720 | gcagagattccttcaactctaCTTCAGCTTCCCGATATCCGACGGTAGTGTgctgactgaattcttg      |
| ATP1A2_721 | ggggttctgtctctcttttCTTCAGCTTCCCGATATCCGACGGTAGTGTcctctgtagtgatgattc      |
| ATP1A2_722 | cctggtgcagggcaaggagaCTTCAGCTTCCCGATATCCGACGGTAGTGTcaagatggccctctctgta    |
| ATP1A2_723 | cggtcagaaatcgctctggcCTTCAGCTTCCCGATATCCGACGGTAGTGTcctctgtttctggcctctc    |
| ATP1A2_725 | atgagctgaactttccacggagCTTCAGCTTCCCGATATCCGACGGTAGTGTgtgggggactgtggggg    |
| ATP1A2_726 | aatttgaagccccaggaaactCTTCAGCTTCCCGATATCCGACGGTAGTGTcagtaacttgcctgctgc    |

|            |                                                                        |
|------------|------------------------------------------------------------------------|
| ATP1A2_727 | gttcaaggagctgcagtggtcttCAGCTTCCCGATATCCGACGGTAGTGTtggggctcatgtctat     |
| ATP1A2_728 | caacattccccatgagcaagtCCTCAGCTTCCCGATATCCGACGGTAGTGTgtgtctctctctctccc   |
| ATP1A2_729 | ccacagtctcttaccctctgatCCTCAGCTTCCCGATATCCGACGGTAGTGTatactcccaggggacac  |
| ATP1A2_730 | aaccacacagagatgctcttgcCCTCAGCTTCCCGATATCCGACGGTAGTGTgggtctgttacagtgcc  |
| ATP1A2_731 | gatctcatcgagctgctccgatCCTCAGCTTCCCGATATCCGACGGTAGTGTctgcctccccgctccctg |
| ATP1A2_732 | gtctctaagcaggcagcagacatCCTCAGCTTCCCGATATCCGACGGTAGTGTttctgctcaagtgtg   |
| ATP1A2_733 | caatgccaatgtcagcctcttCCTCAGCTTCCCGATATCCGACGGTAGTGTctcaaacatcccaacc    |
| ATP1A2_735 | gtgtaggcagtggttcttcaagCCTCAGCTTCCCGATATCCGACGGTAGTGTcacctctgcgctcac    |
| ATP1A2_734 | ccaacatccccctacctgggCCTCAGCTTCCCGATATCCGACGGTAGTGTctctgacctccctgatgc   |
| ATP1A2_736 | ggcacagcctggaagacaatCCTCAGCTTCCCGATATCCGACGGTAGTGTtgcagctgggcacagatat  |
| ATP1A2_737 | aatgagaggctcatcagcatggCCTCAGCTTCCCGATATCCGACGGTAGTGTtcccttcaaatccctcc  |
| ATP1A2_738 | ccagcttgctctgggagCCTCAGCTTCCCGATATCCGACGGTAGTGTtctgctctggaatttggctt    |
| ATP1A2_739 | accatgaatgatctggaggacagCCTCAGCTTCCCGATATCCGACGGTAGTGTgctttggcccttacc   |
| ATP1A2_740 | ccagtagcctgatggcaggaaaCCTCAGCTTCCCGATATCCGACGGTAGTGTctgcaggcattcagct   |
| ATP1A2_741 | accgccgcaactcagcttCCTCAGCTTCCCGATATCCGACGGTAGTGTgacactctcatctgtctctg   |
| ATP1A2_742 | gatgatgagctcagcccactgcCCTCAGCTTCCCGATATCCGACGGTAGTGTccagggctgagttgaa   |
| ATP1A2_743 | accgctcaagtgagtgctctCCTCAGCTTCCCGATATCCGACGGTAGTGTccccctcacctcccac     |
| ATP1A2_744 | cccatgcctggcagtaagagCCTCAGCTTCCCGATATCCGACGGTAGTGTggctgtcacataaaggag   |
| ATP1A2_745 | gtccgaaagctatcctctggCCTCAGCTTCCCGATATCCGACGGTAGTGTtttgaatcctcttaagtg   |
| ATP1A2_746 | catcatagatgaagatgaggaggCCTCAGCTTCCCGATATCCGACGGTAGTGTccagtagtggagtg    |
| ATP1A2_748 | gagagattgggagtgagattgCCTCAGCTTCCCGATATCCGACGGTAGTGTaatgcccccgttatttc   |
| ATP1A2_747 | aaataacgggtggcattgggtCCTCAGCTTCCCGATATCCGACGGTAGTGTctccactccaatctctct  |
| AKT3_750   | gtaagttcaatgctcatgCCTCAGCTTCCCGATATCCGACGGTAGTGTgtgctgtggcatattaag     |
| AKT3_749   | gacttaatatgccacaagcaCCTCAGCTTCCCGATATCCGACGGTAGTGTacatgagctattgaaactt  |
| AKT3_751   | cagtcataccatcctcatcaCCTCAGCTTCCCGATATCCGACGGTAGTGTgtgatgtccaggaatcatt  |
| AKT3_752   | ggacaatgagaggcggcccCCTCAGCTTCCCGATATCCGACGGTAGTGTtgcctctgttcatctttcc   |
| AKT3_753   | gtaaaaagaaagaaaagatttCCTCAGCTTCCCGATATCCGACGGTAGTGTcaattgcttcaaat      |
| AKT3_754   | gcttgacctctttaaactcCCTCAGCTTCCCGATATCCGACGGTAGTGTcttaccagcgactcag      |
| AKT3_756   | ggcatagtggtatataatttggCCTCAGCTTCCCGATATCCGACGGTAGTGTacttaatttattctg    |
| AKT3_755   | attaagtaagtataaaacatttaccCCTCAGCTTCCCGATATCCGACGGTAGTGTtatgccataaagaat |
| AKT3_758   | atttctcgaacactctctcagaCCTCAGCTTCCCGATATCCGACGGTAGTGTgactatggccgagcag   |
| AKT3_757   | gtttctcatgctctggttCCTCAGCTTCCCGATATCCGACGGTAGTGTaattcactaagcgttattt    |
| AKT3_759   | atttttacataaaatgaatcttCCTCAGCTTCCCGATATCCGACGGTAGTGTtgacaaccctaggccc   |
| AKT3_760   | ccctcttggcaaaagccaaCCTCAGCTTCCCGATATCCGACGGTAGTGTaatgcttaaatggtttact   |
| AKT3_761   | cacagatcgagccacatgaaCCTCAGCTTCCCGATATCCGACGGTAGTGTtggattttcatgttgg     |
| AKT3_762   | caccgctctctcgacaaatCCTCAGCTTCCCGATATCCGACGGTAGTGTgcaaaaaaaatttggatt    |
| AKT3_763   | gaggaccgcacagtttctatCCTCAGCTTCCCGATATCCGACGGTAGTGTcacaatattgtagagag    |
| AKT3_765   | atccagatattgcatgtagtaCCTCAGCTTCCCGATATCCGACGGTAGTGTaatacaggattataatgt  |
| AKT3_764   | cattataatcctgtattcttataCCTCAGCTTCCCGATATCCGACGGTAGTGTcatgcaaatctggatt  |
| AKT3_767   | gactagaggacagatgtataatCCTCAGCTTCCCGATATCCGACGGTAGTGTtattattatcagtc     |
| AKT3_766   | cactgataataataattcactatCCTCAGCTTCCCGATATCCGACGGTAGTGTatctgtccttagtca   |
| AKT3_768   | ccaaaagtccctttacctagtaCCTCAGCTTCCCGATATCCGACGGTAGTGTgcacactgcaaaaaaa   |
| AKT3_769   | aaagtatttggctcgagagCCTCAGCTTCCCGATATCCGACGGTAGTGTattgcaaacatataat      |
| AKT3_770   | gtctgtctgtacagcctggCCTCAGCTTCCCGATATCCGACGGTAGTGTgtgctgggaataagtatta   |
| AKT3_771   | gcagaggcaagaagaggagaCCTCAGCTTCCCGATATCCGACGGTAGTGTtattttgtattgattcata  |
| AKT3_772   | gctttggtcgttctgtttcaCCTCAGCTTCCCGATATCCGACGGTAGTGTctttagattgagttgct    |
| AKT3_773   | gatgtctccagtggaactactCCTCAGCTTCCCGATATCCGACGGTAGTGTagaactctgagtctca    |
| AKT3_775   | gtggatttacctatccccctCCTCAGCTTCCCGATATCCGACGGTAGTGTctgttcattttttcagca   |
| AKT3_774   | gaagtatcttggcctcagctCCTCAGCTTCCCGATATCCGACGGTAGTGTaaataaaatacaagatgaat |
| AKT3_777   | gctccgcaaaaaataataCCTCAGCTTCCCGATATCCGACGGTAGTGTgcagcagagaatccaaac     |
| AKT3_776   | gttggattctctgctgctCCTCAGCTTCCCGATATCCGACGGTAGTGTtattttggttggcggagc     |
| HNRNPU_779 | gatacatatttctcaaaaccttCCTCAGCTTCCCGATATCCGACGGTAGTGTcagtttgagtgcttatt  |
| HNRNPU_778 | caataagccactcaactgttCCTCAGCTTCCCGATATCCGACGGTAGTGTggttttgagagaatagta   |
| HNRNPU_781 | gtctttatgtacattaattgtaCCTCAGCTTCCCGATATCCGACGGTAGTGTaatgggctcagagctc   |
| HNRNPU_780 | agccaattgcttggagttCCTCAGCTTCCCGATATCCGACGGTAGTGTacataaaagacataagaaa    |
| HNRNPU_782 | gatagccgattccaccactcCCTCAGCTTCCCGATATCCGACGGTAGTGTcaatcatgctccaggga    |
| HNRNPU_783 | cccctgttttctggcctgCCTCAGCTTCCCGATATCCGACGGTAGTGTacaatgaaactaaaacagc    |
| HNRNPU_784 | gcttttcttgagcagtgCCTCAGCTTCCCGATATCCGACGGTAGTGTctgaactaaatacagaacac    |
| HNRNPU_785 | ggcaagaaccagtttaacagaCCTCAGCTTCCCGATATCCGACGGTAGTGTaacctatgttgaacttca  |
| HNRNPU_786 | cacaatcctaaagctgacaattCCTCAGCTTCCCGATATCCGACGGTAGTGTttttggcttcttctt    |
| HNRNPU_787 | gcttttctggaagcctgCCTCAGCTTCCCGATATCCGACGGTAGTGTacacagtaacagaatataaa    |
| HNRNPU_788 | gtttgccccaaagatgagaCCTCAGCTTCCCGATATCCGACGGTAGTGTtagatagattggttagaat   |
| HNRNPU_789 | ggctctctgcaacagtgCCTCAGCTTCCCGATATCCGACGGTAGTGTcattaattctacacaaact     |
| HNRNPU_790 | gagattgctgcccgaagaaCCTCAGCTTCCCGATATCCGACGGTAGTGTtaaataatcaagttcaag    |
| HNRNPU_791 | caatcatcatcacaactagtgCCTCAGCTTCCCGATATCCGACGGTAGTGTgatcagggcctaaacatt  |



|            |                                                                        |
|------------|------------------------------------------------------------------------|
| HNRNPU_792 | ccaggagctggaaaaactaccCTTCAGCTTCCCGATATCCGACGGTAGTGTagtgaaggctatgaaaa   |
| HNRNPU_793 | gtatactctcaggattggaaaaCTTCAGCTTCCCGATATCCGACGGTAGTGTtgtccaggcaagcaa    |
| HNRNPU_794 | catccagaacgtcccttagCTTCAGCTTCCCGATATCCGACGGTAGTGTtctcaaaatcagtaaggaag  |
| HNRNPU_795 | gttaaaatctgtctctaaactCTTCAGCTTCCCGATATCCGACGGTAGTGTacagtggcctccagc     |
| HNRNPU_796 | gtctcacagttgatgttttCTTCAGCTTCCCGATATCCGACGGTAGTGTtccagtaagcttcttaa     |
| HNRNPU_797 | gaagattatggagaaaagtCTTCAGCTTCCCGATATCCGACGGTAGTGTaagttagtaaaatagatgagt |
| HNRNPU_798 | atcttctgttaacctgaaagtCTTCAGCTTCCCGATATCCGACGGTAGTGTtctgaacattcatgagc   |
| HNRNPU_799 | gatattgacatacatgaagttctCTTCAGCTTCCCGATATCCGACGGTAGTGTgattagccctggcgc   |
| HNRNPU_800 | gaagaagcactgagacgatctCTTCAGCTTCCCGATATCCGACGGTAGTGTtgtctccacaacaaca    |
| HNRNPU_801 | agagtttcttcttctgggCTTCAGCTTCCCGATATCCGACGGTAGTGTtttctcatagacagat       |
| HNRNPU_803 | gaagctgttctcccaattatgaCTTCAGCTTCCCGATATCCGACGGTAGTGTtctgtctgtatcgga    |
| HNRNPU_805 | acattgaagagacaagatagcCTTCAGCTTCCCGATATCCGACGGTAGTGTttagaggctggcc       |
| HNRNPU_804 | gtctttaaaccctcttcttCTTCAGCTTCCCGATATCCGACGGTAGTGTattgtctctgatacagc     |
| HNRNPU_807 | gggaggtagaagaaggcggaaaggCTTCAGCTTCCCGATATCCGACGGTAGTGTacgcagcagcaacagc |
| HNRNPU_806 | gcgaacagcagagtgggcggctCTTCAGCTTCCCGATATCCGACGGTAGTGTaagcaaacagcagca    |
| HNRNPU_808 | gatcgtcgcgttctctctcctcCTTCAGCTTCCCGATATCCGACGGTAGTGTcccgcgtctgttgg     |
| HNRNPU_809 | gggttccaggaagggaagatgCTTCAGCTTCCCGATATCCGACGGTAGTGTggaaggaatctcgctc    |
| HNRNPU_810 | cccaggtctaggctgccttctCTTCAGCTTCCCGATATCCGACGGTAGTGTtagctccatctgtctcc   |
| HNRNPU_811 | gctcgggagcaggctcagCTTCAGCTTCCCGATATCCGACGGTAGTGTtctgacaaggctccaag      |
| HNRNPU_813 | ggagctgaaagaggagctcaagaaCTTCAGCTTCCCGATATCCGACGGTAGTGTaggagcagccagca   |
| HNRNPU_812 | gaggaaactatggtgagggccccCTTCAGCTTCCCGATATCCGACGGTAGTGTgctctctctgctccag  |
| MBD5_885   | gctttatgtcaggtaagttcttaCTTCAGCTTCCCGATATCCGACGGTAGTGTttggagagctcctagc  |
| MBD5_886   | atccacacagcctccaacCTTCAGCTTCCCGATATCCGACGGTAGTGTggtcacttttccacattat    |
| MBD5_888   | acaaagaccactgggactgCTTCAGCTTCCCGATATCCGACGGTAGTGTacctaaaaataaacactg    |
| MBD5_887   | gaacatgcaagtgtggcttCTTCAGCTTCCCGATATCCGACGGTAGTGTaaattatgctttttcata    |
| MBD5_889   | aattattgcagtgccacacCTTCAGCTTCCCGATATCCGACGGTAGTGTgacataattcaaaaaggc    |
| MBD5_890   | gctttgtgacatcttctctcCTTCAGCTTCCCGATATCCGACGGTAGTGTtctgaaccttccaca      |
| MBD5_892   | gagttgctgcccagagaagtaCTTCAGCTTCCCGATATCCGACGGTAGTGTtccaggcagttctgtaca  |
| MBD5_891   | caaattctgtaattgctcaagtgCTTCAGCTTCCCGATATCCGACGGTAGTGTcccaccacaagaggtt  |
| MBD5_893   | aatctccattcctggcagcCTTCAGCTTCCCGATATCCGACGGTAGTGTtcttcaagtaattgga      |
| MBD5_894   | gtccatgttactgctgcccCTTCAGCTTCCCGATATCCGACGGTAGTGTtacttctgtgaaacatca    |
| MBD5_895   | cctgtacagtcactgtgcaaCTTCAGCTTCCCGATATCCGACGGTAGTGTgactgaccacttggag     |
| MBD5_896   | gaaccatgtagcattactgaagCTTCAGCTTCCCGATATCCGACGGTAGTGTtctctgtgatttccat   |
| MBD5_897   | cagaaaaagccattaacatctgCTTCAGCTTCCCGATATCCGACGGTAGTGTgactcaaaagatccagt  |
| MBD5_898   | agaaggtggaggaggaggaggCTTCAGCTTCCCGATATCCGACGGTAGTGTgagtggaacttgaatgga  |
| MBD5_899   | cctggtcacatgaatcatgggCTTCAGCTTCCCGATATCCGACGGTAGTGTatcagaacctgttatcat  |
| MBD5_900   | caatgggagattacttggcaaCTTCAGCTTCCCGATATCCGACGGTAGTGTatccttcaattccagctc  |
| MBD5_901   | gtggtattaaggttccaccaggCTTCAGCTTCCCGATATCCGACGGTAGTGTccccctgacatgatg    |
| MBD5_902   | agggtgcatcatgaaatttctCTTCAGCTTCCCGATATCCGACGGTAGTGTtcttctgactgagttat   |
| MBD5_903   | gtaagagtcagcctgttctCTTCAGCTTCCCGATATCCGACGGTAGTGTccttctcaagctcca       |
| MBD5_904   | gatgcagtaggaaaagctgactCTTCAGCTTCCCGATATCCGACGGTAGTGTtagctgtcttggctgc   |
| MBD5_905   | gcactttaaaccatgttcccCTTCAGCTTCCCGATATCCGACGGTAGTGTccagcaagtagttactc    |
| MBD5_906   | ccggcaacagctccaagtgCTTCAGCTTCCCGATATCCGACGGTAGTGTcttttctgagacatcag     |
| MBD5_907   | cctgactgctaaggaagcagCTTCAGCTTCCCGATATCCGACGGTAGTGTgagcagcactaagagataa  |
| MBD5_908   | ccatttgagactgtctgagcCTTCAGCTTCCCGATATCCGACGGTAGTGTtactattgtactcaagtga  |
| MBD5_909   | gaacatacctttaaaggggaaCTTCAGCTTCCCGATATCCGACGGTAGTGTtctatgagttgcaagct   |
| MBD5_910   | gaagaactagagttcatactCTTCAGCTTCCCGATATCCGACGGTAGTGTagtccccctagcctga     |
| MBD5_912   | ggaatttctaaagccatctcCTTCAGCTTCCCGATATCCGACGGTAGTGTtcttgggtactttttcta   |
| MBD5_911   | ccagtgataccaaacagcattCTTCAGCTTCCCGATATCCGACGGTAGTGTaccatctgcaggttaat   |
| MBD5_913   | atagtcaccactgcagctggCTTCAGCTTCCCGATATCCGACGGTAGTGTgattaataactggtttg    |
| MBD5_914   | gccatcttgaagaacagatgCTTCAGCTTCCCGATATCCGACGGTAGTGTtgggaagatggttgttg    |
| MBD5_915   | atatctccagccttcagcagCTTCAGCTTCCCGATATCCGACGGTAGTGTcgcacttattttccatcc   |
| MBD5_916   | gattctggttaggagatgctgCTTCAGCTTCCCGATATCCGACGGTAGTGTaataacctgcccacatg   |
| MBD5_917   | caaatcagcaacagcagcaaCTTCAGCTTCCCGATATCCGACGGTAGTGTccaagaatcacattatt    |
| MBD5_918   | attgttghtaaacagcagctCTTCAGCTTCCCGATATCCGACGGTAGTGTagtctgaaacagacaag    |
| MBD5_919   | gttactgtccctttcacctcCTTCAGCTTCCCGATATCCGACGGTAGTGTcagtaacaataaacctatg  |
| MBD5_920   | ataccttgtgagttgcaacCTTCAGCTTCCCGATATCCGACGGTAGTGTactgcttctgtctatttc    |
| MBD5_921   | aagtgtagtgttggattctcaCTTCAGCTTCCCGATATCCGACGGTAGTGTcaactgttgaatagg     |
| MBD5_922   | actcagatcagccccattccaCTTCAGCTTCCCGATATCCGACGGTAGTGTcaacaggtgaagatgg    |
| MBD5_923   | gtactgttactgcagtggtgaCTTCAGCTTCCCGATATCCGACGGTAGTGTatgatcaaacctccat    |
| MBD5_924   | atattcaagtcaagttgctCTTCAGCTTCCCGATATCCGACGGTAGTGTcagtgctgcttcatg       |
| MBD5_925   | caaacctctctctgtcaCTTCAGCTTCCCGATATCCGACGGTAGTGTtaggactactgtgatatgg     |
| MBD5_926   | actgtccagggataaaattctCTTCAGCTTCCCGATATCCGACGGTAGTGTggaagtacaggaattt    |
| MBD5_927   | gggtgctgttcccaggcagCTTCAGCTTCCCGATATCCGACGGTAGTGTatgtgtgacatcttccac    |
| MBD5_928   | cagttccaagtctcaaatCTTCAGCTTCCCGATATCCGACGGTAGTGTgatgagtttaagagag       |

|            |                                                                         |
|------------|-------------------------------------------------------------------------|
| MBD5_929   | cagtgttagcagctctccaaaCTTCAGCTTCCCGATATCCGACGGTAGTGTctaggcacacaccatta    |
| MBD5_930   | gttcaattgtggcacttggtCTTCAGCTTCCCGATATCCGACGGTAGTGTgactttaatgccccaaagcg  |
| MBD5_931   | gtatcaattcatttgaagagggggCTTCAGCTTCCCGATATCCGACGGTAGTGTtctctggggctttgt   |
| MBD5_932   | gctttttgtatcatcactttggCTTCAGCTTCCCGATATCCGACGGTAGTGTtctctggcctggaaaaat  |
| MBD5_933   | gtccggaaaaggaacagaaaagCTTCAGCTTCCCGATATCCGACGGTAGTGTaccggcaggaagtaaaaa  |
| MBD5_934   | gtaggcttccaaacctctgttagCTTCAGCTTCCCGATATCCGACGGTAGTGTccacagctgggacaga   |
| MBD5_935   | actggacaaaatgtctgggaCTTCAGCTTCCCGATATCCGACGGTAGTGTgttttctgattaggaat     |
| MBD5_936   | cactcatggcctcatgaatagCTTCAGCTTCCCGATATCCGACGGTAGTGTtagtattgctatgtgagttg |
| MBD5_938   | aaaaaacacaacaacagaggaCTTCAGCTTCCCGATATCCGACGGTAGTGTcctttaataaacactgcg   |
| MBD5_937   | gcgcagtgtttataaaggaaCTTCAGCTTCCCGATATCCGACGGTAGTGTctctgtgtgtgttttt      |
| CACNB4_939 | gtcagggtaatcttctccacaCTTCAGCTTCCCGATATCCGACGGTAGTGTactgctatggcaattgt    |
| CACNB4_940 | cataccaggacacttacaaccCTTCAGCTTCCCGATATCCGACGGTAGTGTtagacgaagtctaagacc   |
| CACNB4_941 | ataatgtcagcttcattcatctaCTTCAGCTTCCCGATATCCGACGGTAGTGTgagcctttcattgtga   |
| CACNB4_942 | gtgtgggtggcacgccagtaCTTCAGCTTCCCGATATCCGACGGTAGTGTatgtaagggtgtaaaaagca  |
| CACNB4_943 | accagtagcacacctgaccCTTCAGCTTCCCGATATCCGACGGTAGTGTaatggaagttaaaggatt     |
| CACNB4_944 | aaccgtgtaaaaacctgatagCTTCAGCTTCCCGATATCCGACGGTAGTGTctcttctaactagtaaga   |
| CACNB4_945 | gtcacaagtaaacactgaatgCTTCAGCTTCCCGATATCCGACGGTAGTGTatactcaggccaagca     |
| CACNB4_946 | atcttgccaactcaagattcttCTTCAGCTTCCCGATATCCGACGGTAGTGTaaggcagaaggagcta    |
| CACNB4_947 | gcagacaccatcaatcaccctCTTCAGCTTCCCGATATCCGACGGTAGTGTctttctaatgtaagaacta  |
| CACNB4_948 | agagaaatgtcagctgtcactctCTTCAGCTTCCCGATATCCGACGGTAGTGTgtcagccggctgta     |
| CACNB4_949 | ataatccagcaagagagcaCTTCAGCTTCCCGATATCCGACGGTAGTGTactgtggttataactact     |
| CACNB4_951 | cctttaaccaactgtgtgatCTTCAGCTTCCCGATATCCGACGGTAGTGTgttttgcctcattcttt     |
| CACNB4_950 | gaggcaaacacatgcagagaCTTCAGCTTCCCGATATCCGACGGTAGTGTtttggtaaaaggaataa     |
| CACNB4_953 | catctgttactctcagttctgaCTTCAGCTTCCCGATATCCGACGGTAGTGTcctcactctgtcacgc    |
| CACNB4_952 | gacaaggtgaggttgagcatCTTCAGCTTCCCGATATCCGACGGTAGTGTgaagagtaacagatgat     |
| CACNB4_955 | caatgctccattcagtgaccCTTCAGCTTCCCGATATCCGACGGTAGTGTctgtcattgcagagttt     |
| CACNB4_954 | gatggaagaatgtaccattgCTTCAGCTTCCCGATATCCGACGGTAGTGTtagaaccttaacagtaga    |
| CACNB4_957 | cacacatgcaagtagtttgcCTTCAGCTTCCCGATATCCGACGGTAGTGTcaagtggaaattctcttc    |
| CACNB4_956 | actaaagactcactccccaggaCTTCAGCTTCCCGATATCCGACGGTAGTGTacagtgatgaaaagagt   |
| CACNB4_958 | gcctctctatcaccaatcaCTTCAGCTTCCCGATATCCGACGGTAGTGTaaaaaaagtgcatagaaaag   |
| CACNB4_959 | gggctgtgaaattggcttcaCTTCAGCTTCCCGATATCCGACGGTAGTGTtagcattttattctctgt    |
| CACNB4_960 | atgctacaggtttggactaggCTTCAGCTTCCCGATATCCGACGGTAGTGTggatgcagtagttctaca   |
| CACNB4_961 | ccgtgaagacaaatgtgagctaCTTCAGCTTCCCGATATCCGACGGTAGTGTatcctcttggaaagt     |
| CACNB4_962 | aatccgctgaaacctggcaaaCTTCAGCTTCCCGATATCCGACGGTAGTGTccaagagaaggaaagaga   |
| CACNB4_963 | cacaagcaggcctgactCTTCAGCTTCCCGATATCCGACGGTAGTGTtagtgtgcatcaaattta       |
| CACNB4_965 | gatagctaatccctctccccctCTTCAGCTTCCCGATATCCGACGGTAGTGTctgtagctgtggttct    |
| CACNB4_964 | gaaaccacagctacagcttaaCTTCAGCTTCCCGATATCCGACGGTAGTGTgagaggaattagctatct   |
| CACNB4_967 | agaaggaggcgggagaccaggaCTTCAGCTTCCCGATATCCGACGGTAGTGTctctccccatctctctc   |
| CACNB4_966 | acacacggggccagagagaagCTTCAGCTTCCCGATATCCGACGGTAGTGTctctccccatctctctc    |
| CACNB4_969 | gctcttctcgagcatctttcaCTTCAGCTTCCCGATATCCGACGGTAGTGTctctctcacctctctc     |
| CACNB4_968 | cagagaccggaaggagggtgaCTTCAGCTTCCCGATATCCGACGGTAGTGTgactgctgaaaagatgctc  |
| CACNB4_971 | ccttctctctcacactctctCTTCAGCTTCCCGATATCCGACGGTAGTGTcacacgggtggccat       |
| CACNB4_970 | catggccagcccgtgtcggCTTCAGCTTCCCGATATCCGACGGTAGTGTgaggtgtgaggaaggaagag   |
| ERBB4_1052 | atccgccattctgttataaaaCTTCAGCTTCCCGATATCCGACGGTAGTGTccacctaataaacccaaa   |
| ERBB4_1053 | cggcctattgtggcagagaatcCTTCAGCTTCCCGATATCCGACGGTAGTGTgaaggccaagaaagcgtt  |
| ERBB4_1054 | catactcatctcggccttggCTTCAGCTTCCCGATATCCGACGGTAGTGTgctgtggttccagtagtca   |
| ERBB4_1055 | gaatgagcactgtacctcaaCTTCAGCTTCCCGATATCCGACGGTAGTGTttagaataacctgaatccag  |
| ERBB4_1056 | aaaaaacccacagattgtttcCTTCAGCTTCCCGATATCCGACGGTAGTGTcaaaagggttctctctcc   |
| ERBB4_1058 | aggagagctggatgaggaagCTTCAGCTTCCCGATATCCGACGGTAGTGTgctgagatttttagtact    |
| ERBB4_1057 | gtacctctgggtgctactgtccCTTCAGCTTCCCGATATCCGACGGTAGTGTaatggcagctgttctga   |
| ERBB4_1059 | actcctgttcagcagcaaaaccCTTCAGCTTCCCGATATCCGACGGTAGTGTggacatgggtgccac     |
| ERBB4_1060 | gtgccctacagagcccaactCTTCAGCTTCCCGATATCCGACGGTAGTGTatcctgtgctattaac      |
| ERBB4_1062 | cggctttgttaccatgttCTTCAGCTTCCCGATATCCGACGGTAGTGTattgcctctattatattcca    |
| ERBB4_1061 | ggaagaaaaatggaatgatggaCTTCAGCTTCCCGATATCCGACGGTAGTGTcagagacagagaggaa    |
| ERBB4_1063 | cctcagcatccatcatcttCTTCAGCTTCCCGATATCCGACGGTAGTGTattacatgatttatatct     |
| ERBB4_1064 | gtacttggctcctcaggcttCTTCAGCTTCCCGATATCCGACGGTAGTGTcatattgtgtctgatgggc   |
| ERBB4_1065 | caacctggaaatttacacagtgCTTCAGCTTCCCGATATCCGACGGTAGTGTggcctagtctaaaggca   |
| ERBB4_1066 | atthaaggaaactggctgtgCTTCAGCTTCCCGATATCCGACGGTAGTGTaacacaattttcaaacctt   |
| ERBB4_1067 | ggatttctcgcttggaaatCTTCAGCTTCCCGATATCCGACGGTAGTGTctgtattacttactaaga     |
| ERBB4_1068 | aacgtttgcctcagctccccCTTCAGCTTCCCGATATCCGACGGTAGTGTgtttgtaaatgcttaagt    |
| ERBB4_1070 | gcttgaagcaaaaatacatCTTCAGCTTCCCGATATCCGACGGTAGTGTaaaactttactcttact      |
| ERBB4_1069 | agtaagaagtaaaagttaCTTCAGCTTCCCGATATCCGACGGTAGTGTgtatttttcttacaagc       |
| ERBB4_1071 | gctgcaaatccgatgaacCTTCAGCTTCCCGATATCCGACGGTAGTGTaagattgctctcaaaaagat    |
| ERBB4_1072 | gtgaaaatcacagatttgggcCTTCAGCTTCCCGATATCCGACGGTAGTGTaaaacctgggcattaact   |
| ERBB4_1073 | gctggatggtgggctcagacCTTCAGCTTCCCGATATCCGACGGTAGTGTcataagaattgacaggca    |

|            |                                                                          |
|------------|--------------------------------------------------------------------------|
| ERBB4_1074 | gcctgttgagatgtccacCTTCAGCTTCCCGATATCCGACGGTAGTGTcatggtattgcatTTTTTC      |
| ERBB4_1076 | acagacaccaggcaatcacCTTCAGCTTCCCGATATCCGACGGTAGTGTatataatgtaattTTTTTC     |
| ERBB4_1075 | aaaaaatttacataaatatgaCTTCAGCTTCCCGATATCCGACGGTAGTGTttcctgggtgctgta       |
| ERBB4_1078 | gagctgaagagggtaaaagtcCTTCAGCTTCCCGATATCCGACGGTAGTGTtagacagagagagagactg   |
| ERBB4_1077 | ccactgggagttaatggttccaCTTCAGCTTCCCGATATCCGACGGTAGTGTttaaactaacgatatgcg   |
| ERBB4_1079 | attactccagctgcaatcaggCTTCAGCTTCCCGATATCCGACGGTAGTGTgaagaggagaagaata      |
| ERBB4_1080 | ggtagggctcttattctggtCTTCAGCTTCCCGATATCCGACGGTAGTGTatttggaaatggtgataat    |
| ERBB4_1082 | cctttcctagtatcatgaacaaCTTCAGCTTCCCGATATCCGACGGTAGTGTtctgtaattgctgca      |
| ERBB4_1081 | attctccatccacagtacatCTTCAGCTTCCCGATATCCGACGGTAGTGTacaaaatggaacatgta      |
| ERBB4_1083 | gttgggcatctttaaataCTTCAGCTTCCCGATATCCGACGGTAGTGTccttggccagcaagaatg       |
| ERBB4_1084 | aatgtccagatggcttacaggCTTCAGCTTCCCGATATCCGACGGTAGTGTaacacatgaatactcc      |
| ERBB4_1086 | cctgaagacatctgtggtgctCTTCAGCTTCCCGATATCCGACGGTAGTGTacacctctcatgtggct     |
| ERBB4_1085 | agccatgagggaggtgaagcCTTCAGCTTCCCGATATCCGACGGTAGTGTaccacagatgcttcagg      |
| ERBB4_1087 | cagatggtgacacacattcctCTTCAGCTTCCCGATATCCGACGGTAGTGTgaaggcaacctagaaga     |
| ERBB4_1088 | ggggacctggccagaccaaCTTCAGCTTCCCGATATCCGACGGTAGTGTctttagaatactgattacct    |
| ERBB4_1089 | gtgttccagttaatggtatCTTCAGCTTCCCGATATCCGACGGTAGTGTgtttggccaaaaga          |
| ERBB4_1090 | cagcacaatcaaccagagaatCTTCAGCTTCCCGATATCCGACGGTAGTGTcttatctcaagcaacagg    |
| ERBB4_1091 | ataaggctgtcacattttatCTTCAGCTTCCCGATATCCGACGGTAGTGTgctgatttctcttc         |
| ERBB4_1092 | cctacaagtgaagagtgaaaaaCTTCAGCTTCCCGATATCCGACGGTAGTGTaatctgtgagccctgc     |
| ERBB4_1093 | cctgaacatacagctatggccaCTTCAGCTTCCCGATATCCGACGGTAGTGTagaanaatttctactacccc |
| ERBB4_1095 | caactgtgcctatgaacaCTTCAGCTTCCCGATATCCGACGGTAGTGTtagtaaaatataaattggct     |
| ERBB4_1094 | gcaaaatataatttactaaggCTTCAGCTTCCCGATATCCGACGGTAGTGTatagcgcaacagttgc      |
| ERBB4_1096 | cctgtccaatgcatcacaCTTCAGCTTCCCGATATCCGACGGTAGTGTtaactgcaaaaaatttaa       |
| ERBB4_1097 | cagctcagactgtggattccCTTCAGCTTCCCGATATCCGACGGTAGTGTacaataaaaaatactgct     |
| ERBB4_1098 | aactggaatctaccacaagttaCTTCAGCTTCCCGATATCCGACGGTAGTGTaggccagttctaacta     |
| ERBB4_1099 | gtgtgctgcctgcccctagtCTTCAGCTTCCCGATATCCGACGGTAGTGTatcaatgatgtaactatt     |
| ERBB4_1100 | acacatgctcactgtcattCTTCAGCTTCCCGATATCCGACGGTAGTGTggttattcttattctgta      |
| ERBB4_1101 | agtgccccaaacctttgtcCTTCAGCTTCCCGATATCCGACGGTAGTGTatagaaaaaaacctctct      |
| ERBB4_1102 | gttctgcacacacgtctgCTTCAGCTTCCCGATATCCGACGGTAGTGTgagcagtaataaaagag        |
| ERBB4_1103 | atgtgacggcagatgctacggCTTCAGCTTCCCGATATCCGACGGTAGTGTctgaattgagcaagaca     |
| ERBB4_1105 | acacaggttgatggtgcaagCTTCAGCTTCCCGATATCCGACGGTAGTGTattataactgcatgtcc      |
| ERBB4_1104 | ggacatgcacttataatcttCTTCAGCTTCCCGATATCCGACGGTAGTGTaccacatcaacctgtgt      |
| ERBB4_1106 | gtctgcataacaaaggaattgCTTCAGCTTCCCGATATCCGACGGTAGTGTgccacatagggtagaaca    |
| ERBB4_1107 | atattgttggaaacctggcCTTCAGCTTCCCGATATCCGACGGTAGTGTtaccttttcatcaacaag      |
| ERBB4_1108 | cccagaataatgctaaattCTTCAGCTTCCCGATATCCGACGGTAGTGTgcatattgcccatttggga     |
| ERBB4_1109 | gatcgatatgcttggcaataCTTCAGCTTCCCGATATCCGACGGTAGTGTaacacaggcaactgtttgt    |
| ERBB4_1110 | ccaggtcagagagagctcaCTTCAGCTTCCCGATATCCGACGGTAGTGTtagaagaagaagccacagc     |
| ERBB4_1111 | acagcagtagcagccttgcCTTCAGCTTCCCGATATCCGACGGTAGTGTgaatagagagttttagaaa     |
| ERBB4_1113 | ccttctggcactccggtcgcCTTCAGCTTCCCGATATCCGACGGTAGTGTtggacatgtaattgctcagc   |
| ERBB4_1112 | gctgacaattacatgtccaaatggCTTCAGCTTCCCGATATCCGACGGTAGTGTccggagtgccagaagg   |
| MEF2C_1154 | gtggaattcgttccggtgatCTTCAGCTTCCCGATATCCGACGGTAGTGTactctgaagaaaaaa        |
| MEF2C_1155 | cattggactcaccagacctcCTTCAGCTTCCCGATATCCGACGGTAGTGTccacccttcgagatacc      |
| MEF2C_1156 | actctgagataaatgagtctagtCTTCAGCTTCCCGATATCCGACGGTAGTGTggagatctccccgct     |
| MEF2C_1157 | caaatctctcctgcttctacCTTCAGCTTCCCGATATCCGACGGTAGTGTgtctatgagctttaa        |
| MEF2C_1159 | gcccctcagtcagttgggtaCTTCAGCTTCCCGATATCCGACGGTAGTGTtcttaactagagactc       |
| MEF2C_1158 | gaagagcctggtggttgaCTTCAGCTTCCCGATATCCGACGGTAGTGTgtcattgttttcaaaat        |
| MEF2C_1160 | attatcgttattatagatattttCTTCAGCTTCCCGATATCCGACGGTAGTGTgacaggtctgcactac    |
| MEF2C_1161 | gttgctacggaaccatggCTTCAGCTTCCCGATATCCGACGGTAGTGTacttttctcttatttct        |
| MEF2C_1162 | cctactttaccaggacaaggaaCTTCAGCTTCCCGATATCCGACGGTAGTGTgaaactaatattttaa     |
| MEF2C_1164 | ggtgagagcgttccctcaaaCTTCAGCTTCCCGATATCCGACGGTAGTGTgtgtctatcggaagatgc     |
| MEF2C_1163 | catcttccgatagacacaacagttCTTCAGCTTCCCGATATCCGACGGTAGTGTggaagcgtctcacca    |
| MEF2C_1165 | atttgctgcatattctgttCTTCAGCTTCCCGATATCCGACGGTAGTGTcattatcaatatttatt       |
| MEF2C_1166 | cgtaaaccagatctccagctCTTCAGCTTCCCGATATCCGACGGTAGTGTattgtttttgtaacagg      |
| MEF2C_1167 | aagcttaatggtaagacgtacattCTTCAGCTTCCCGATATCCGACGGTAGTGTccagcagacctggtga   |
| MEF2C_1169 | cccagactccatactgcatatCTTCAGCTTCCCGATATCCGACGGTAGTGTgaggttgctgaaggtaaa    |
| MEF2C_1168 | actttacctcagcaacctcagctCTTCAGCTTCCCGATATCCGACGGTAGTGTctgcagatggagctg     |
| MEF2C_1170 | acaggttgctgtacaccaaCTTCAGCTTCCCGATATCCGACGGTAGTGTgattacatccttagaga       |
| MEF2C_1171 | gaaacccaacctattgccaCTTCAGCTTCCCGATATCCGACGGTAGTGTattctttcttcttctt        |
| MEF2C_1172 | cacagcctttgttttcttcttCTTCAGCTTCCCGATATCCGACGGTAGTGTgacctactaccttggta     |
| MEF2C_1173 | atcccactccttattgcaCTTCAGCTTCCCGATATCCGACGGTAGTGTattgatcaatgatcagcag      |
| MEF2C_1174 | ggctgtcacagcattaaggCTTCAGCTTCCCGATATCCGACGGTAGTGTaatgaaggtgttctgagta     |
| MEF2C_1175 | gacccgatcggacgattcCTTCAGCTTCCCGATATCCGACGGTAGTGTctgaaactggacagcttg       |
| MEF2C_1176 | gttggtgctgtgaaatgatcagCTTCAGCTTCCCGATATCCGACGGTAGTGTggggctcaccagcat      |
| MEF2C_1177 | agctgtccagatgcccagcaCTTCAGCTTCCCGATATCCGACGGTAGTGTaaaacttggctgcttct      |
| MEF2C_1179 | ccacatattgaaaggtacagaCTTCAGCTTCCCGATATCCGACGGTAGTGTcgagagagagaagaaaa     |

|              |                                                                         |
|--------------|-------------------------------------------------------------------------|
| MEF2C_1178   | gtttttcttctctctcgtcCTTCAGCTTCCCGATATCCGACGGTAGTGTgtacccttaacatgatg      |
| SYNGAP1_1219 | gggggagaagaagagagaagagCTTCAGCTTCCCGATATCCGACGGTAGTGTccatgatggccctcccc   |
| SYNGAP1_1218 | gggggaggccatattgggggCTTCAGCTTCCCGATATCCGACGGTAGTGTtttctctcttcttcccc     |
| SYNGAP1_1220 | gctggatgaggatgagtggaCTTCAGCTTCCCGATATCCGACGGTAGTGTtttctgtgtctctgtc      |
| SYNGAP1_1221 | gagcagctggtccccgagaCTTCAGCTTCCCGATATCCGACGGTAGTGTccatttgcaaatgtttctc    |
| SYNGAP1_1222 | gtacggcggccgagcaggctCTTCAGCTTCCCGATATCCGACGGTAGTGTtctgacacacccccacctc   |
| SYNGAP1_1223 | gctcggcgtggggccgccccCTTCAGCTTCCCGATATCCGACGGTAGTGTgtctccgcttctccccgc    |
| SYNGAP1_1225 | ggaggaaatggccagaaggaaCTTCAGCTTCCCGATATCCGACGGTAGTGTaactgagccacatctggt   |
| SYNGAP1_1224 | gcctaccagatgtggctcagtCTTCAGCTTCCCGATATCCGACGGTAGTGTcttccctctggccatttc   |
| SYNGAP1_1226 | gtgctgacctgaccggtagcCTTCAGCTTCCCGATATCCGACGGTAGTGTaccctatccccattccc     |
| SYNGAP1_1227 | cgaagctgctggctcggctCTTCAGCTTCCCGATATCCGACGGTAGTGTaaccttgcacacagataac    |
| SYNGAP1_1228 | cattatcaagccagtgacagcCTTCAGCTTCCCGATATCCGACGGTAGTGTtctctctctgacctcc     |
| SYNGAP1_1229 | aatcttcatcaagttagctcCTTCAGCTTCCCGATATCCGACGGTAGTGTtcttcttagacctctct     |
| SYNGAP1_1231 | aaggagtgtggagttgaggCTTCAGCTTCCCGATATCCGACGGTAGTGTagggtgtctcccccttattc   |
| SYNGAP1_1230 | gaataaaggggacacaacctgtCTTCAGCTTCCCGATATCCGACGGTAGTGTtcaactccacactcctt   |
| SYNGAP1_1232 | catgctgatgcacgaccacCTTCAGCTTCCCGATATCCGACGGTAGTGTttaaactcatgccccacc     |
| SYNGAP1_1233 | catccaggcagagctcacagtaCTTCAGCTTCCCGATATCCGACGGTAGTGTgagtcacggtcacagatgc |
| SYNGAP1_1234 | acttcacagagcagtggtaccCTTCAGCTTCCCGATATCCGACGGTAGTGTttaaacaactgcccggct   |
| SYNGAP1_1235 | ccagggtggccactggcacagtCTTCAGCTTCCCGATATCCGACGGTAGTGTcaactcctttgcccttg   |
| SYNGAP1_1236 | cagagtatgtaccaacattatcCTTCAGCTTCCCGATATCCGACGGTAGTGTtccggagggggaggg     |
| SYNGAP1_1237 | aactcttatatagctccatgggCTTCAGCTTCCCGATATCCGACGGTAGTGTacctggccttgctgt     |
| SYNGAP1_1238 | aggctgacctggatttctcCTTCAGCTTCCCGATATCCGACGGTAGTGTagtccacatctgcagag      |
| SYNGAP1_1239 | ctgcacaaccaatctcCTTCAGCTTCCCGATATCCGACGGTAGTGTactcttctatgctttagtggc     |
| SYNGAP1_1240 | acctccagatgtccaccCTTCAGCTTCCCGATATCCGACGGTAGTGTggaacgggagcacctcatattc   |
| SYNGAP1_1241 | gaatgtgctgtgagttggccctCTTCAGCTTCCCGATATCCGACGGTAGTGTgaccacacctcttgtgc   |
| SYNGAP1_1242 | caggttggctggctctgCTTCAGCTTCCCGATATCCGACGGTAGTGTctctttgaggatggacagat     |
| SYNGAP1_1244 | gaagcaaacacctctcagctCTTCAGCTTCCCGATATCCGACGGTAGTGTtactctgcataagccc      |
| SYNGAP1_1243 | cagacaggcttatcagcctcCTTCAGCTTCCCGATATCCGACGGTAGTGTcggtctctcttctct       |
| SYNGAP1_1245 | actttccaagtggaggagctcCTTCAGCTTCCCGATATCCGACGGTAGTGTactctctccctccttc     |
| SYNGAP1_1246 | ggccaggttctggatgacctgCTTCAGCTTCCCGATATCCGACGGTAGTGTcatagcctccccatctc    |
| SYNGAP1_1247 | ccaacagcagtagcttggaggCTTCAGCTTCCCGATATCCGACGGTAGTGTtttatcttctgaccttgg   |
| SYNGAP1_1248 | gtgtccagattggagatctcataCTTCAGCTTCCCGATATCCGACGGTAGTGTgggatagggcaagagg   |
| SYNGAP1_1249 | catccaaaggcagccaagccCTTCAGCTTCCCGATATCCGACGGTAGTGTcctcagaggccctctaga    |
| SYNGAP1_1250 | agagctgtgctgatgtcgtgaCTTCAGCTTCCCGATATCCGACGGTAGTGTgggtgctacctgttgag    |
| SYNGAP1_1251 | ggaggaaaagcaccagttctcCTTCAGCTTCCCGATATCCGACGGTAGTGTgctacatgatgcccga     |
| SYNGAP1_1253 | agcacagacagagaaggagagaCTTCAGCTTCCCGATATCCGACGGTAGTGTgtggagtgaggagggaa   |
| SYNGAP1_1252 | gtctgttccctcccactcCTTCAGCTTCCCGATATCCGACGGTAGTGTatctctctctctctgtct      |
| SYNGAP1_1254 | gttctatgtaagcctccaccCTTCAGCTTCCCGATATCCGACGGTAGTGTcaggagccctgacctta     |
| SYNGAP1_1255 | ggtctttaccaccaggcCTTCAGCTTCCCGATATCCGACGGTAGTGTaccctgtaagtccagcatg      |
| SYNGAP1_1256 | cagccttgggctacggcctgCTTCAGCTTCCCGATATCCGACGGTAGTGTgagtgtaacaagagtgtg    |
| SYNGAP1_1257 | ggcttgagtgcagcaggtccccCTTCAGCTTCCCGATATCCGACGGTAGTGTgggacaccgtctgtggtg  |
| SYNGAP1_1258 | cggtggccatggcccactctcCTTCAGCTTCCCGATATCCGACGGTAGTGTctcagccagatgggtg     |
| SYNGAP1_1259 | gacctggccatcagcagccCTTCAGCTTCCCGATATCCGACGGTAGTGTtcttgctatagccatggaat   |
| SYNGAP1_1260 | cagtgatgagttggaccctctgCTTCAGCTTCCCGATATCCGACGGTAGTGTaccaccaccagggtg     |
| SYNGAP1_1261 | gtggctatgaaggatggaggcagcCTTCAGCTTCCCGATATCCGACGGTAGTGTgaggggctggcctct   |
| SYNGAP1_1263 | ccccaccgtcccactccagCTTCAGCTTCCCGATATCCGACGGTAGTGTataacttggctctggggac    |
| SYNGAP1_1262 | caagtctcagcagtgacagtaCTTCAGCTTCCCGATATCCGACGGTAGTGTgagcagcatgctgtccc    |
| SYNGAP1_1264 | aagcctcctacccaagcagCTTCAGCTTCCCGATATCCGACGGTAGTGTcatccagcgggaatctatt    |
| SYNGAP1_1265 | ccccccaccctccgccacCTTCAGCTTCCCGATATCCGACGGTAGTGTgcaagaagattgtaacttca    |
| SYNGAP1_1266 | acatgctcactgtcggctCTTCAGCTTCCCGATATCCGACGGTAGTGTaatgtacctgtttttccc      |
| SYNGAP1_1267 | ggcattgtggggttaagtggcCTTCAGCTTCCCGATATCCGACGGTAGTGTgcccgtctcatccat      |
| SYNGAP1_1268 | cttccagggtcagttatgtggCTTCAGCTTCCCGATATCCGACGGTAGTGTacaagctcaaggagtact   |
| SYNGAP1_1269 | aacaaaccagcaaatcctgatcCTTCAGCTTCCCGATATCCGACGGTAGTGTagtggggctgtgtg      |
| SYNGAP1_1270 | ccgctatactcttccagctCTTCAGCTTCCCGATATCCGACGGTAGTGTctgccaatgatgctcttga    |
| SYNGAP1_1271 | actcaggagcccaccaggagagCTTCAGCTTCCCGATATCCGACGGTAGTGTggcagagaaggattccca  |
| SYNGAP1_1273 | gggacggcctcagtggggtCTTCAGCTTCCCGATATCCGACGGTAGTGTggacacggagaagataaatg   |
| SYNGAP1_1272 | catttatcttccgtgtcccatcCTTCAGCTTCCCGATATCCGACGGTAGTGTcaactgaaacccgtccc   |
| SYNGAP1_1274 | attacggagaacggcaggttccCTTCAGCTTCCCGATATCCGACGGTAGTGTcgtcctcttttgggtg    |
| SYNGAP1_1275 | cggggtgggggtggtggggCTTCAGCTTCCCGATATCCGACGGTAGTGTggtgatgtccaatctggtg    |
| CLVS2_1276   | atatggtcatcaccaggccggCTTCAGCTTCCCGATATCCGACGGTAGTGTggaagctcagagataggc   |
| CLVS2_1277   | cagcgtgtctgggtttcattgaCTTCAGCTTCCCGATATCCGACGGTAGTGTgcggaaggcctcaaggt   |
| CLVS2_1278   | caagcaggcactgaaggatggCTTCAGCTTCCCGATATCCGACGGTAGTGTtcatcttacccttctg     |
| CLVS2_1279   | gccagggtcggctgcttaaCTTCAGCTTCCCGATATCCGACGGTAGTGTagaatacaagttggattta    |
| CLVS2_1280   | acttcacttcaagcaagccCTTCAGCTTCCCGATATCCGACGGTAGTGTtttagtactttctgtcgc     |
| CLVS2_1281   | gatcaaaacaaccattcactCTTCAGCTTCCCGATATCCGACGGTAGTGTagaagtcaaacacaagag    |

|             |                                                                         |
|-------------|-------------------------------------------------------------------------|
| CLVS2_1282  | cggaaaagggtattctttcttCCTCAGCTTCCCGATATCCGACGGTAGTGTgattgtttttctccat     |
| CLVS2_1283  | atcacggtgtacagggcatgCCTCAGCTTCCCGATATCCGACGGTAGTGTgaagtacattttactatagc  |
| CLVS2_1284  | ggcaagaacactgctagaccatCCTCAGCTTCCCGATATCCGACGGTAGTGTtccccctctctgcat     |
| CLVS2_1285  | gtccccatgtcataaggaggcCCTCAGCTTCCCGATATCCGACGGTAGTGTtacccagcataaccttt    |
| CLVS2_1286  | gttttctgtatacattttctggCCTCAGCTTCCCGATATCCGACGGTAGTGTgcatgcctggaagga     |
| CLVS2_1288  | aaggataaagccaacgtcagCCTCAGCTTCCCGATATCCGACGGTAGTGTttccatttctaatacctga   |
| CLVS2_1287  | cccttcattggattagaatggaCCTCAGCTTCCCGATATCCGACGGTAGTGTcactgacgttggcttat   |
| STX1A_1304  | cagatgatgatcatgattttcttCCTCAGCTTCCCGATATCCGACGGTAGTGTcccagcaggtggcag    |
| STX1A_1305  | gtcatcgctccactgttgggggCCTCAGCTTCCCGATATCCGACGGTAGTGTgactgtccagctccag    |
| STX1A_1306  | cgtgttccacattgtactcgaCCTCAGCTTCCCGATATCCGACGGTAGTGTatggttgggggtccta     |
| STX1A_1307  | ggtagactatgtggagaggccCCTCAGCTTCCCGATATCCGACGGTAGTGTcaggggtcttctctgaa    |
| STX1A_1308  | gcttgatgatctactgtccgCCTCAGCTTCCCGATATCCGACGGTAGTGTgaggttagtgcagccctg    |
| STX1A_1309  | cgtgagctacacgacatgttcatCCTCAGCTTCCCGATATCCGACGGTAGTGTcagcaagcctctgggt   |
| STX1A_1311  | gacccctagtgtgggtctggacCCTCAGCTTCCCGATATCCGACGGTAGTGTgagggaccagaccagt    |
| STX1A_1310  | gtcacactgagcccagcccttCCTCAGCTTCCCGATATCCGACGGTAGTGTggtgagggggtcatggca   |
| STX1A_1312  | ccacaaacttctggacagctggCCTCAGCTTCCCGATATCCGACGGTAGTGTgccctccaggtctcca    |
| STX1A_1313  | ggtcatgtcggagtacaaccaCCTCAGCTTCCCGATATCCGACGGTAGTGTgacacaggtgcggccac    |
| STX1A_1314  | gtggctgctaagtataaccaggCCTCAGCTTCCCGATATCCGACGGTAGTGTcagagcactgaggtccc   |
| STX1A_1317  | ggggcattctagcctgtcttCCTCAGCTTCCCGATATCCGACGGTAGTGTtaccaccctttctac       |
| STX1A_1316  | aggtagaagggtggggtaggCCTCAGCTTCCCGATATCCGACGGTAGTGTaagcaggctagaatgcc     |
| STX1A_1318  | atctctccactcgggaccaaCCTCAGCTTCCCGATATCCGACGGTAGTGTcttggggcctgaaacc      |
| STX1A_1319  | cgaggcttcattgacaagatcgcaCCTCAGCTTCCCGATATCCGACGGTAGTGTgactggtccctctc    |
| STX1A_1321  | gcctctgagccaggttcagtCCTCAGCTTCCCGATATCCGACGGTAGTGTgacagcagatgatgatg     |
| STX1A_1320  | gtggacgtatgtacaggaccacCCTCAGCTTCCCGATATCCGACGGTAGTGTggaagggtgggtgtgc    |
| STX1A_1323  | ccggcccagcgcggccgccCCTCAGCTTCCCGATATCCGACGGTAGTGTgcccggccgggtggcgc      |
| STX1A_1322  | cgccagcccggcccggcccCCTCAGCTTCCCGATATCCGACGGTAGTGTggccgcgctggggccgga     |
| SEMA3E_1385 | cattttaagcttttctcttCCTCAGCTTCCCGATATCCGACGGTAGTGTaaattcttaaaagacagt     |
| SEMA3E_1386 | caccctcaagtggaaagtatgCCTCAGCTTCCCGATATCCGACGGTAGTGTatctcgcaggagcaaaa    |
| SEMA3E_1387 | caaggtgattttacggacctCCTCAGCTTCCCGATATCCGACGGTAGTGTaagaattcctgtaccatg    |
| SEMA3E_1388 | aggtagtggaaaggagaaagtCCTCAGCTTCCCGATATCCGACGGTAGTGTacagatgacagatggtt    |
| SEMA3E_1389 | cccttccactacatcttcttCCTCAGCTTCCCGATATCCGACGGTAGTGTcatctgatttgttaacct    |
| SEMA3E_1390 | gccagatgttctcagtcttaCCTCAGCTTCCCGATATCCGACGGTAGTGTtttgaatagcagctatg     |
| SEMA3E_1391 | acagtactttgtggaatgtaccCCTCAGCTTCCCGATATCCGACGGTAGTGTgacttaataatgttt     |
| SEMA3E_1392 | gtctccgaaacgcctgaaaCCTCAGCTTCCCGATATCCGACGGTAGTGTactcttttaagaagtgtg     |
| SEMA3E_1393 | gttcgacatggaatgcagcCCTCAGCTTCCCGATATCCGACGGTAGTGTgatcatttttctagtagc     |
| SEMA3E_1394 | cagtcagcacaagcacttccCCTCAGCTTCCCGATATCCGACGGTAGTGTattagggtttcttaagcaa   |
| SEMA3E_1395 | gcctggctcgagacccttaccCCTCAGCTTCCCGATATCCGACGGTAGTGTgattttgtccatttctgcta |
| SEMA3E_1397 | ggtgtgtgttctatatgtgagCCTCAGCTTCCCGATATCCGACGGTAGTGTatattaaggttaagtgt    |
| SEMA3E_1396 | acatttaccttaatatgttgaCCTCAGCTTCCCGATATCCGACGGTAGTGTatagaacacacacct      |
| SEMA3E_1399 | actacaagtgagatgtaaataggCCTCAGCTTCCCGATATCCGACGGTAGTGTggaattgtctgaaag    |
| SEMA3E_1398 | acaagaataaaactagaatctaCCTCAGCTTCCCGATATCCGACGGTAGTGTtctgtatttttgcctta   |
| SEMA3E_1400 | gtttttatgggcaggttttaCCTCAGCTTCCCGATATCCGACGGTAGTGTatctctgagctacttctc    |
| SEMA3E_1401 | acctgaaacaaatagcagtagaCCTCAGCTTCCCGATATCCGACGGTAGTGTgggagatcggaaacc     |
| SEMA3E_1402 | gctttacaccaaagagaaatCCTCAGCTTCCCGATATCCGACGGTAGTGTgctgtacattagtgga      |
| SEMA3E_1404 | ccaaggcctggttctgtaagtCCTCAGCTTCCCGATATCCGACGGTAGTGTaatattttctagggca     |
| SEMA3E_1403 | aggtccttctatgtcataCCTCAGCTTCCCGATATCCGACGGTAGTGTtctatgaaacagtgaa        |
| SEMA3E_1405 | cctacaaagataagagtcaagtCCTCAGCTTCCCGATATCCGACGGTAGTGTaaggctcccgaatgc     |
| SEMA3E_1407 | caatatagaacaagatgctcCCTCAGCTTCCCGATATCCGACGGTAGTGTactaagcagtggaatgg     |
| SEMA3E_1406 | ggccattccatcgcttagtatCCTCAGCTTCCCGATATCCGACGGTAGTGTggcactcttctctatat    |
| SEMA3E_1408 | ccctctacatcattctgtgaCCTCAGCTTCCCGATATCCGACGGTAGTGTgagcaaatataacct       |
| SEMA3E_1409 | ataagtgagcactttctaaaCCTCAGCTTCCCGATATCCGACGGTAGTGTaaagtacataacttggc     |
| SEMA3E_1411 | atgctcagcaattacaccCCTCAGCTTCCCGATATCCGACGGTAGTGTcatttttctctattttt       |
| SEMA3E_1410 | catctctgtcttattgtcaggCCTCAGCTTCCCGATATCCGACGGTAGTGTgtgagataagcaagcat    |
| SEMA3E_1412 | aacaattcactactacacggCCTCAGCTTCCCGATATCCGACGGTAGTGTacatactctttctctatc    |
| SEMA3E_1413 | gctggactctacagtactctCCTCAGCTTCCCGATATCCGACGGTAGTGTatagatataatgtcata     |
| SEMA3E_1414 | cctctctcagatctgggtgaCCTCAGCTTCCCGATATCCGACGGTAGTGTaaagaatgtaactgaattg   |
| SEMA3E_1415 | gatgtccttttgacccagcCCTCAGCTTCCCGATATCCGACGGTAGTGTgaagtttcatatgtttacc    |
| SEMA3E_1416 | cccgaacataattgacattCCTCAGCTTCCCGATATCCGACGGTAGTGTtgtttttatgacagcaa      |
| SEMA3E_1417 | cactataacaggacacaccttCCTCAGCTTCCCGATATCCGACGGTAGTGTaaacatgacttctagg     |
| SEMA3E_1419 | gattcattgtaaataaacaaatCCTCAGCTTCCCGATATCCGACGGTAGTGTtttcagtgtggtttat    |
| SEMA3E_1418 | ataaacacactgaaaccatttCCTCAGCTTCCCGATATCCGACGGTAGTGTtaattacaatgaatc      |
| SEMA3E_1420 | gcagcattgtatggagatcaaCCTCAGCTTCCCGATATCCGACGGTAGTGTccttttctactctactga   |
| SEMA3E_1421 | caagagaggctcttctgggaCCTCAGCTTCCCGATATCCGACGGTAGTGTattacattttctctgtg     |
| SEMA3E_1422 | gtccagtaagtaaccaccCCTCAGCTTCCCGATATCCGACGGTAGTGTacgacttttttcttttt       |
| SEMA3E_1423 | ggacaggaggtcatacagctCCTCAGCTTCCCGATATCCGACGGTAGTGTgaggggaagtctaagtaaa   |

|            |                                                                         |
|------------|-------------------------------------------------------------------------|
| KCNQ3_1534 | gtcgtccacaggggatgggattCTTCAGCTTCCCGATATCCGACGGTAGTGTcccagagacagatgatt   |
| KCNQ3_1533 | gtctgtgtcgtctcacctcCTTCAGCTTCCCGATATCCGACGGTAGTGTctacattacaaggggggt     |
| KCNQ3_1535 | gtctcgtgatgctactctctCTTCAGCTTCCCGATATCCGACGGTAGTGTctcatccagctcgacc      |
| KCNQ3_1536 | gtccctgatgtcgtcaaccaCTTCAGCTTCCCGATATCCGACGGTAGTGTgctctgctacttgactc     |
| KCNQ3_1538 | cagcaacaacgatgtgagagCTTCAGCTTCCCGATATCCGACGGTAGTGTgaaccacctacagcttc     |
| KCNQ3_1537 | ggggcaggttcacaggggtcaCTTCAGCTTCCCGATATCCGACGGTAGTGTggtcagcctgggagtgccag |
| KCNQ3_1539 | gcccttggttgggtaatactcCTTCAGCTTCCCGATATCCGACGGTAGTGTgtcaatggctcacctggt   |
| KCNQ3_1540 | cgccagctgaagcagagaagCTTCAGCTTCCCGATATCCGACGGTAGTGTtcacagctccttgatttc    |
| KCNQ3_1541 | gtctcagctgtcaccaggcCTTCAGCTTCCCGATATCCGACGGTAGTGTtctcccatgtcctgaac      |
| KCNQ3_1543 | gatctgtacatttatttcaCTTCAGCTTCCCGATATCCGACGGTAGTGTtctgctctcttaggaat      |
| KCNQ3_1542 | cgaacacttctaagatcattaCTTCAGCTTCCCGATATCCGACGGTAGTGTccagtttttggtgaga     |
| KCNQ3_1544 | catatctattctgaaagaacaaaCTTCAGCTTCCCGATATCCGACGGTAGTGTgcaccctggcccat     |
| KCNQ3_1545 | ggacctccctcacgcaaaCTTCAGCTTCCCGATATCCGACGGTAGTGTtctatattccaacct         |
| KCNQ3_1546 | cctcaaagtctctgaattttCTTCAGCTTCCCGATATCCGACGGTAGTGTtagggcttgaggggag      |
| KCNQ3_1547 | gatgtgattgagcagttactCTTCAGCTTCCCGATATCCGACGGTAGTGTgctctctgttagctcc      |
| KCNQ3_1548 | catctgggagggagacacatatCTTCAGCTTCCCGATATCCGACGGTAGTGTggcacaggtgggaccg    |
| KCNQ3_1549 | cggaagacaggggctatgggaCTTCAGCTTCCCGATATCCGACGGTAGTGTggggattgacacatccag   |
| KCNQ3_1550 | gactttctctatggcatctacaCTTCAGCTTCCCGATATCCGACGGTAGTGTgaagagacagggggga    |
| KCNQ3_1551 | gaaccaaagcctgttgcttaCTTCAGCTTCCCGATATCCGACGGTAGTGTtttgcctattttgtagcca   |
| KCNQ3_1552 | cggtcatttcacagtgctgaatCTTCAGCTTCCCGATATCCGACGGTAGTGTtccaagagaccagctt    |
| KCNQ3_1554 | gaattcccttctcacatctctCTTCAGCTTCCCGATATCCGACGGTAGTGTgagaagcttgcagcaa     |
| KCNQ3_1553 | gcttctctgaagatgatggCTTCAGCTTCCCGATATCCGACGGTAGTGTagggaattcataatcagaa    |
| KCNQ3_1556 | ggggactcacctgaatgctcagCTTCAGCTTCCCGATATCCGACGGTAGTGTcattgttccctctttt    |
| KCNQ3_1555 | aaagaggggcaacaatgagtgCTTCAGCTTCCCGATATCCGACGGTAGTGTcattcagtgagtcccca    |
| KCNQ3_1558 | atgaactggaatgggattaagatCTTCAGCTTCCCGATATCCGACGGTAGTGTcctgctctccctccag   |
| KCNQ3_1557 | gaggcaggcaggcagtcaccCTTCAGCTTCCCGATATCCGACGGTAGTGTtccagttatcccaggca     |
| KCNQ3_1559 | cagtgatctgaagagagaaCTTCAGCTTCCCGATATCCGACGGTAGTGTggggatgcatatatcaa      |
| KCNQ3_1560 | acaagacacccaaaactgtggaaCTTCAGCTTCCCGATATCCGACGGTAGTGTtggccaagctgatgga   |
| KCNQ3_1561 | aaccaggtagacaagaatgaaCTTCAGCTTCCCGATATCCGACGGTAGTGTgacagctcaatctcagaa   |
| KCNQ3_1562 | aggtaggagcacaagagagaaCTTCAGCTTCCCGATATCCGACGGTAGTGTgactccccagtgaccact   |
| KCNQ3_1563 | atctgcaggaagcgaggcttcCTTCAGCTTCCCGATATCCGACGGTAGTGTggcataggtgggtggaa    |
| KCNQ3_1564 | gcacctggaagcttctgggcCTTCAGCTTCCCGATATCCGACGGTAGTGTcagacatctttgtgctgatt  |
| KCNQ3_1565 | agcatgtccaagcagtgaggacaCTTCAGCTTCCCGATATCCGACGGTAGTGTaaccactggcacagagg  |
| KCNQ3_1566 | atgaaaatagcaaatgtctcctCTTCAGCTTCCCGATATCCGACGGTAGTGTgaggctcagggtcagga   |
| KCNQ3_1567 | ggagccgagtttctttaggCTTCAGCTTCCCGATATCCGACGGTAGTGTgacaacagcacaatgga      |
| KCNQ3_1569 | attgattctgggtaaatgctCTTCAGCTTCCCGATATCCGACGGTAGTGTtaggttcttagtccattt    |
| KCNQ3_1568 | aaatggactaaggaactttgaCTTCAGCTTCCCGATATCCGACGGTAGTGTttaccccaagatgcaat    |
| KCNQ3_1571 | ggattctcatttggggatgaaCTTCAGCTTCCCGATATCCGACGGTAGTGTgaccttgtctgcccatt    |
| KCNQ3_1570 | gcagacaaggtcaagataaaCTTCAGCTTCCCGATATCCGACGGTAGTGTtcaaaaagagatccaaag    |
| KCNQ3_1572 | gtacttggcgttttcttctgacCTTCAGCTTCCCGATATCCGACGGTAGTGTccaagtccccagcgc     |
| KCNQ3_1573 | ggcgcatacaactttgatctaCTTCAGCTTCCCGATATCCGACGGTAGTGTgacaaaagcggaccctg    |
| KCNQ3_1574 | ccctcggctgggttagccgCTTCAGCTTCCCGATATCCGACGGTAGTGTtcggccgcccctcca        |
| KCNQ3_1575 | acgcgccggcggcggcagcCTTCAGCTTCCCGATATCCGACGGTAGTGTgagcggagaaggcaagcgg    |
| APBA1_1577 | aggactctcctctggttCTTCAGCTTCCCGATATCCGACGGTAGTGTccccactaaagtgtgtt        |
| APBA1_1576 | gtaaaagaacaccttagtggCTTCAGCTTCCCGATATCCGACGGTAGTGTcacaaccaggaaggag      |
| APBA1_1579 | cacgagaagatgtccacattCTTCAGCTTCCCGATATCCGACGGTAGTGTaatgagggtaactctgctt   |
| APBA1_1578 | acgctcctctcagctattcCTTCAGCTTCCCGATATCCGACGGTAGTGTcagcaccacctcagcc       |
| APBA1_1580 | actcgggactgattcttaagCTTCAGCTTCCCGATATCCGACGGTAGTGTtgtggaaaaggggtgga     |
| APBA1_1581 | aagctgaatatcgtgagatgctCTTCAGCTTCCCGATATCCGACGGTAGTGTtcggaagactcagtgca   |
| APBA1_1582 | caccatgcatcatgttggcaCTTCAGCTTCCCGATATCCGACGGTAGTGTactgattttcccatattca   |
| APBA1_1583 | gagaaatctgggaagctgaataCTTCAGCTTCCCGATATCCGACGGTAGTGTtttttctctccaggt     |
| APBA1_1584 | gggacaccaaccagatgagCTTCAGCTTCCCGATATCCGACGGTAGTGTcctttctgctctctatgaa    |
| APBA1_1585 | gttaatccattggccctgaggCTTCAGCTTCCCGATATCCGACGGTAGTGTggagaacagcttcaggt    |
| APBA1_1586 | gatctcagcagaaggatagatCTTCAGCTTCCCGATATCCGACGGTAGTGTgactgctctgctgac      |
| APBA1_1587 | gagttggagcaggatccgCTTCAGCTTCCCGATATCCGACGGTAGTGTgtaagagaacctaaccaa      |
| APBA1_1588 | ccacctatcccaggatgggaaaCTTCAGCTTCCCGATATCCGACGGTAGTGTgctccaggagacaatga   |
| APBA1_1589 | catgcagggtgggctccaggCTTCAGCTTCCCGATATCCGACGGTAGTGTtaggaaatggctccagag    |
| APBA1_1591 | agctggcttccactttccaCTTCAGCTTCCCGATATCCGACGGTAGTGTtgtgtcaaacctttctctt    |
| APBA1_1590 | caagagaaaagttgaccacactaCTTCAGCTTCCCGATATCCGACGGTAGTGTgaaaggtggaagccagc  |
| APBA1_1593 | gcctgttctttcattcgttCTTCAGCTTCCCGATATCCGACGGTAGTGTctttgagtctctacacatt    |
| APBA1_1592 | agactcaaagtaaaaagggaaCTTCAGCTTCCCGATATCCGACGGTAGTGTagaacaggcatacacca    |
| APBA1_1594 | attccatgatcaagtctcggCTTCAGCTTCCCGATATCCGACGGTAGTGTgtggagcaccagatgt      |
| APBA1_1595 | gccaattacctggctcactcCTTCAGCTTCCCGATATCCGACGGTAGTGTgagagggagatgtgcca     |
| APBA1_1597 | aaagaaaatactgagcactgagCTTCAGCTTCCCGATATCCGACGGTAGTGTtcatgttgatggatgat   |
| APBA1_1596 | cacaatcatcatgcaacatgCTTCAGCTTCCCGATATCCGACGGTAGTGTactcagtgctcagatattt   |

|            |                                                                          |
|------------|--------------------------------------------------------------------------|
| APBA1_1599 | gtgctgtttttgttaccaaagccCTTCAGCTTCCCGATATCCGACGGTAGTGTtactgtgtttctcttg    |
| APBA1_1598 | caagaggaaacacagtgagaacCTTCAGCTTCCCGATATCCGACGGTAGTGTtggtaacaaacagcac     |
| APBA1_1601 | gggtcatgcccaggacattagCTTCAGCTTCCCGATATCCGACGGTAGTGTcagggtacagcaaggag     |
| APBA1_1600 | ggatggctctgttttccctccCTTCAGCTTCCCGATATCCGACGGTAGTGTgaagccaaacccgcac      |
| APBA1_1602 | gtaggggagcgtccaggctctCTTCAGCTTCCCGATATCCGACGGTAGTGTtagcagatggcatcgcg     |
| APBA1_1603 | cggccgggggtcggccgacCTTCAGCTTCCCGATATCCGACGGTAGTGTacagctacagcaggaggag     |
| APBA1_1604 | cagggcctcctggcggtagCTTCAGCTTCCCGATATCCGACGGTAGTGTggcactatctgtgctgct      |
| APBA1_1605 | gcgcgcgctgcaccattacCTTCAGCTTCCCGATATCCGACGGTAGTGTccgactacggcggcctccag    |
| APBA1_1606 | gtgtccagcagtggaagtgCTTCAGCTTCCCGATATCCGACGGTAGTGTtctctctgtacagctgct      |
| APBA1_1607 | aggaagccatgaatgctggcctacCTTCAGCTTCCCGATATCCGACGGTAGTGTtagagcgcctatgctgtg |
| APBA1_1608 | gtgtggttgggaagcgcctctCTTCAGCTTCCCGATATCCGACGGTAGTGTctgctcgtgtactctc      |
| APBA1_1609 | gacaccgaggggcagctgCTTCAGCTTCCCGATATCCGACGGTAGTGTactatgtggccgcca          |
| APBA1_1610 | caccgactgttccctccacCTTCAGCTTCCCGATATCCGACGGTAGTGTtctctctgcccagct         |
| APBA1_1611 | acccgaggtggaagagaacCTTCAGCTTCCCGATATCCGACGGTAGTGTcggccagcttctctc         |
| KCNT1_862  | accggaccttgagtttgacacCTTCAGCTTCCCGATATCCGACGGTAGTGTaagaaggtggcgctcc      |
| KCNT1_863  | ggtgtagccccgcccgcCTTCAGCTTCCCGATATCCGACGGTAGTGTgtctggagggtgcccggagc      |
| KCNT1_864  | cctgctgctggcgaccctctCTTCAGCTTCCCGATATCCGACGGTAGTGTggggcgtggcgtgtg        |
| KCNT1_865  | cccgaagcggtagcggcCTTCAGCTTCCCGATATCCGACGGTAGTGTcggcggaccggcctcagca       |
| KCNT1_867  | gaagcagagggggcatggaggCTTCAGCTTCCCGATATCCGACGGTAGTGTcaacacctcctgctgg      |
| KCNT1_866  | ccaggcagggaggttggaggCTTCAGCTTCCCGATATCCGACGGTAGTGTcatgcccctctgcttcc      |
| KCNT1_869  | gcacaatgtagagcaggcagtgCTTCAGCTTCCCGATATCCGACGGTAGTGTcccaggagccatca       |
| KCNT1_868  | gccacgtgcccggggcCTTCAGCTTCCCGATATCCGACGGTAGTGTtagcctgaggccgctgcct        |
| KCNT1_871  | ccccttagcaccactgcaaggaCTTCAGCTTCCCGATATCCGACGGTAGTGTctgagcctgctgctatt    |
| KCNT1_870  | caggggtgggtgggatgctctCTTCAGCTTCCCGATATCCGACGGTAGTGTccagcgtgctgtctctc     |
| KCNT1_873  | actagtgtccccagccaccctggCTTCAGCTTCCCGATATCCGACGGTAGTGTccactgcagctgggag    |
| KCNT1_872  | ccccctcccagctcagtgCTTCAGCTTCCCGATATCCGACGGTAGTGTccaggggtggggggacac       |
| KCNT1_875  | ggagctctgagcaggcccggctCTTCAGCTTCCCGATATCCGACGGTAGTGTgggagggggggacc       |
| KCNT1_874  | gggggtccccaccctcccaCTTCAGCTTCCCGATATCCGACGGTAGTGTccccggctgctcagagct      |
| KCNT1_877  | actctgccctcatcaCTTCAGCTTCCCGATATCCGACGGTAGTGTtccccaccctccccctccc         |
| KCNT1_876  | gcaaacggggggtatCTTCAGCTTCCCGATATCCGACGGTAGTGTacaggtcaggcctgggctccagg     |
| KCNT1_879  | gggatgaacaggttccgagcCTTCAGCTTCCCGATATCCGACGGTAGTGTactgcacagtgcttcc       |
| KCNT1_878  | cgctggaaaacatgattgaagccCTTCAGCTTCCCGATATCCGACGGTAGTGTgagccccagctccag     |
| KCNT1_880  | ccttctgacccctgctgtCTTCAGCTTCCCGATATCCGACGGTAGTGTtctagtcttattcattggc      |
| KCNT1_881  | gaggacctggtgaacatggcCTTCAGCTTCCCGATATCCGACGGTAGTGTgagacataggcatctgtatc   |
| KCNT1_882  | gtcacgcccaagatctggccCTTCAGCTTCCCGATATCCGACGGTAGTGTtagcccccctcactgccag    |
| KCNT1_883  | atgcagaagtagaaggagctcagCTTCAGCTTCCCGATATCCGACGGTAGTGTctggtcccagaggacc    |
| KCNT1_884  | gcacagtggggggcactcCTTCAGCTTCCCGATATCCGACGGTAGTGTtgggtgctatgatctgctc      |
| KCNT1_886  | cacggtggcggctgtagttgccccCTTCAGCTTCCCGATATCCGACGGTAGTGTcgtctgctggccacg    |
| KCNT1_885  | gtcagctcccaagatcagcctCTTCAGCTTCCCGATATCCGACGGTAGTGTgctcgtgctgctcacc      |
| KCNT1_887  | actcaagaccaggacctcatcgCTTCAGCTTCCCGATATCCGACGGTAGTGTgacctccgctggcc       |
| KCNT1_888  | cagagccctggagtagatgaccCTTCAGCTTCCCGATATCCGACGGTAGTGTtggccaggagagcga      |
| KCNT1_890  | gcaccagggcctgagcgtggcCTTCAGCTTCCCGATATCCGACGGTAGTGTccccgctccccgcccc      |
| KCNT1_889  | gggcccggggagcggggctcctCTTCAGCTTCCCGATATCCGACGGTAGTGTctcaggccctggtgat     |
| KCNT1_892  | ggcagttggggcgaagtctctCTTCAGCTTCCCGATATCCGACGGTAGTGTcagatgacacatccca      |
| KCNT1_891  | acaagtttcaagcaagtttctCTTCAGCTTCCCGATATCCGACGGTAGTGTtagagccagccgctct      |
| KCNT1_893  | gacctccacctcatccctCTTCAGCTTCCCGATATCCGACGGTAGTGTtagtactgtggggaggga       |
| KCNT1_894  | ggcagatgagctcagcggcCTTCAGCTTCCCGATATCCGACGGTAGTGTcccggcggcagcggcc        |
| KCNT1_895  | gcatgggtgacagcaagttctcCTTCAGCTTCCCGATATCCGACGGTAGTGTgaaggggagccatggc     |
| KCNT1_896  | gatgtgtacacctggtggcCTTCAGCTTCCCGATATCCGACGGTAGTGTcagagcagagcagccct       |
| KCNT1_897  | aacatcaccaaggaggagaactCTTCAGCTTCCCGATATCCGACGGTAGTGTaagttgcccgtcctct     |
| KCNT1_898  | atgtagaagcaggtgtcagaggCTTCAGCTTCCCGATATCCGACGGTAGTGTggaggcagatgctgtg     |
| KCNT1_899  | gtgaccaggtgggatgggagaccaCTTCAGCTTCCCGATATCCGACGGTAGTGTggggctgcagcagggt   |
| KCNT1_900  | cggcggcccagatcgcggcCTTCAGCTTCCCGATATCCGACGGTAGTGTcaaagcagaggctctct       |
| KCNT1_901  | gcccagccgttctcgtggcaCTTCAGCTTCCCGATATCCGACGGTAGTGTtaccacggagagccctc      |
| KCNT1_902  | ccttgggtgtccccatgctctCTTCAGCTTCCCGATATCCGACGGTAGTGTccagtcggaggatgaggt    |
| KCNT1_903  | acaaggttaaggctggcgctctCTTCAGCTTCCCGATATCCGACGGTAGTGTgtgctgagggtcctgtc    |
| KCNT1_904  | ggcctttcacaggcaggaggtCTTCAGCTTCCCGATATCCGACGGTAGTGTcaatggtatgaaatgtaa    |
| KCNT1_905  | atgggctgtacaactctctgCTTCAGCTTCCCGATATCCGACGGTAGTGTaccacagccctgactcc      |
| KCNT1_906  | gcttgttctgaaaccgtaggcCTTCAGCTTCCCGATATCCGACGGTAGTGTcaggagcctcacttgtg     |
| KCNT1_907  | gcaggggaaatggggcctctCTTCAGCTTCCCGATATCCGACGGTAGTGTctaaccctcgtgctg        |
| KCNT1_909  | caggccagtgggccctaccCTTCAGCTTCCCGATATCCGACGGTAGTGTcttactgtccacagagcc      |
| KCNT1_908  | acaccaccctccccctctctCTTCAGCTTCCCGATATCCGACGGTAGTGTtccaggaccctgtccc       |
| KCNT1_911  | gcaggctgtccagcgtggtggcCTTCAGCTTCCCGATATCCGACGGTAGTGTggagcaccggaaatg      |
| KCNT1_910  | gtggacaaggagagcaccatgaCTTCAGCTTCCCGATATCCGACGGTAGTGTctctgacaaatcccgg     |
| KCNT1_912  | agacccccacagccagccacCTTCAGCTTCCCGATATCCGACGGTAGTGTccatctgaacgtgcaga      |

|               |                                                                         |
|---------------|-------------------------------------------------------------------------|
| KCNT1_914     | gtgggtgagctccgtggtgatCTTCAGCTTCCCGATATCCGACGGTAGTGTttctccactctttctgg    |
| KCNT1_913     | ctactctctggctcttccaacCTTCAGCTTCCCGATATCCGACGGTAGTGTtctcaacaaccatg       |
| KCNT1_915     | gcatgttgacacactgctctacCTTCAGCTTCCCGATATCCGACGGTAGTGTgccactggaggacctc    |
| KCNT1_916     | gatctgaaagacgcccggCTTCAGCTTCCCGATATCCGACGGTAGTGTtcagaggagctctatcatt     |
| KCNT1_918     | ccgggtgatggtgatcatgtagtCTTCAGCTTCCCGATATCCGACGGTAGTGTcctggaatcaggggcag  |
| KCNT1_917     | gtacctctgtgccgtaagtccCTTCAGCTTCCCGATATCCGACGGTAGTGTactgtggctccctccctc   |
| KCNT1_920     | ggaggagcagagcttctggaagCTTCAGCTTCCCGATATCCGACGGTAGTGTaaggtggggatgctgtgg  |
| KCNT1_919     | ccagctcttccacctcggagCTTCAGCTTCCCGATATCCGACGGTAGTGTaactcagggttcccacc     |
| KCNT1_922     | aaggaaacagcgagctctgggaCTTCAGCTTCCCGATATCCGACGGTAGTGTcctgtgggtgggtgggt   |
| KCNT1_921     | ggagcaccagaacatcgagcttCTTCAGCTTCCCGATATCCGACGGTAGTGTtagaccaggctgaggc    |
| KCNT1_924     | cccttcacttcccgtgtctcaCTTCAGCTTCCCGATATCCGACGGTAGTGTccttgcggctcagctc     |
| KCNT1_923     | gccccacacggggcgggtCTTCAGCTTCCCGATATCCGACGGTAGTGTcaccctcccgcctgcc        |
| KCNT1_925     | gagctggtgaagaaccgatgaaCTTCAGCTTCCCGATATCCGACGGTAGTGTaagagcctgcagtgggc   |
| KCNT1_926     | gagagctctggcgtcagagCTTCAGCTTCCCGATATCCGACGGTAGTGTggccgactgtcttggct      |
| KCNT1_928     | cagcctgccctccagctCTTCAGCTTCCCGATATCCGACGGTAGTGTggtgactcacacaatgct       |
| KCNT1_927     | gcacctgtgggctgtgtggagacCTTCAGCTTCCCGATATCCGACGGTAGTGTgggggggtgactctg    |
| KCNT1_929     | gagacacagctctgagccaccCTTCAGCTTCCCGATATCCGACGGTAGTGTaggctctctgtccctc     |
| KCNT1_930     | gggttgacagacagcctgtgCTTCAGCTTCCCGATATCCGACGGTAGTGTcatccccagggtcacgc     |
| SLC25A2_1706  | aagtagaccactgtgctgctgCTTCAGCTTCCCGATATCCGACGGTAGTGTtctcctgagctgact      |
| SLC25A2_1707  | gggatcgcggagctccctgctgggCTTCAGCTTCCCGATATCCGACGGTAGTGTacccttctgctctcc   |
| SLC25A2_1708  | gtcttcaccactgcaagggcgCTTCAGCTTCCCGATATCCGACGGTAGTGTaaggacgaagggctcagc   |
| SLC25A2_1709  | cgtcaacgaggacacctactctCTTCAGCTTCCCGATATCCGACGGTAGTGTcctgtgatgctcagctc   |
| SLC25A2_1710  | gtagaaggcactctctcctggaCTTCAGCTTCCCGATATCCGACGGTAGTGTgtgagcctggccaag     |
| SLC25A2_1711  | gtccttctggcggcgtgtgCTTCAGCTTCCCGATATCCGACGGTAGTGTccacctctgtcccacg       |
| SLC25A2_1712  | cactgaggctgggacacccccCTTCAGCTTCCCGATATCCGACGGTAGTGTcccactgctctgctc      |
| SLC25A2_1713  | cggccccagccaccagctgaCTTCAGCTTCCCGATATCCGACGGTAGTGTcccagttccacagaaga     |
| SLC25A2_1715  | cacgcccagggatgctgaagaCTTCAGCTTCCCGATATCCGACGGTAGTGTcccaggggtggcaggta    |
| SLC25A2_1714  | cagcccgcagcatctcttaagCTTCAGCTTCCCGATATCCGACGGTAGTGTaccctcttcccaccta     |
| SLC25A2_1716  | gttcacagcagctctgtgggCTTCAGCTTCCCGATATCCGACGGTAGTGTatcctttatctgaagccaa   |
| SLC25A2_1717  | gagaaggccatcaagctggcagCTTCAGCTTCCCGATATCCGACGGTAGTGTgggacagggttttgcca   |
| SLC25A2_1719  | gtttggctcggtgggctcagCTTCAGCTTCCCGATATCCGACGGTAGTGTacagtccaggaccctgg     |
| SLC25A2_1718  | ccagggctcctgactgtctagCTTCAGCTTCCCGATATCCGACGGTAGTGTgcccagccagccaaac     |
| SLC25A2_1721  | cgtgtacacagcagctgtagtCTTCAGCTTCCCGATATCCGACGGTAGTGTgacacccctgtccacaca   |
| SLC25A2_1720  | aacacgcaggtgacaccgatcagCTTCAGCTTCCCGATATCCGACGGTAGTGTgccccacctctcctg    |
| SLC25A2_1724  | gtgcctcaccaccctgaccCTTCAGCTTCCCGATATCCGACGGTAGTGTtccctcaaggcctctc       |
| SLC25A2_1722  | actcgttaccaccagtaggaCTTCAGCTTCCCGATATCCGACGGTAGTGTattgatgagcttggctgg    |
| PRICKLE1_1778 | gtcatctgtatagtaggcaaatCTTCAGCTTCCCGATATCCGACGGTAGTGTcaatgctctgcatcac    |
| PRICKLE1_1779 | gtccacctctgacttccaCTTCAGCTTCCCGATATCCGACGGTAGTGTcaggatgatgattctcgg      |
| PRICKLE1_1780 | gtagagatcagcattctgtagtCTTCAGCTTCCCGATATCCGACGGTAGTGTtcttccgtagcggaa     |
| PRICKLE1_1781 | gacagtacgcccactcactCTTCAGCTTCCCGATATCCGACGGTAGTGTatcttgttcagaagaagaaa   |
| PRICKLE1_1782 | ccgagctcttactcatcggaCTTCAGCTTCCCGATATCCGACGGTAGTGTgtctgcttgggagagt      |
| PRICKLE1_1783 | gacgctctacaatttgaagagCTTCAGCTTCCCGATATCCGACGGTAGTGTatctccagctcagaca     |
| PRICKLE1_1784 | caaagtccatattgctcatctCTTCAGCTTCCCGATATCCGACGGTAGTGTgattgagacttggacc     |
| PRICKLE1_1785 | acttctcatgctgcacaggaCTTCAGCTTCCCGATATCCGACGGTAGTGTgtttggcctctcttcta     |
| PRICKLE1_1786 | atatttgattaaaaccatagggaCTTCAGCTTCCCGATATCCGACGGTAGTGTtctccatccaccgaa    |
| PRICKLE1_1787 | atgattataccctgaagcccaCTTCAGCTTCCCGATATCCGACGGTAGTGTcccataatccctagatt    |
| PRICKLE1_1788 | atgaaacacagtgatgaagaCTTCAGCTTCCCGATATCCGACGGTAGTGTtctgatgatgactgggca    |
| PRICKLE1_1789 | aatatccatctcattggctgCTTCAGCTTCCCGATATCCGACGGTAGTGTcccagtcactctgtgact    |
| PRICKLE1_1790 | gagccagtgagcactggatcCTTCAGCTTCCCGATATCCGACGGTAGTGTggcagagtagcaggaa      |
| PRICKLE1_1791 | gaggccaggaactgtgattcCTTCAGCTTCCCGATATCCGACGGTAGTGTtctcagggtcttctggag    |
| PRICKLE1_1792 | caatgctgatgacaccttctcCTTCAGCTTCCCGATATCCGACGGTAGTGTtcagtgcagctgatcaa    |
| PRICKLE1_1793 | catccaacaagaggctttacaCTTCAGCTTCCCGATATCCGACGGTAGTGTacactcttccggagtc     |
| PRICKLE1_1794 | acagggctcagattactgctcCTTCAGCTTCCCGATATCCGACGGTAGTGTtctatcttccaacacag    |
| PRICKLE1_1795 | gggtgacacagatataattaatccCTTCAGCTTCCCGATATCCGACGGTAGTGTctgtgatggtccaca   |
| PRICKLE1_1797 | agtactgtgaaacctgtgggaaCTTCAGCTTCCCGATATCCGACGGTAGTGTctgagggctgcatttg    |
| PRICKLE1_1796 | cttctgatatacctctgtccCTTCAGCTTCCCGATATCCGACGGTAGTGTccaagacagactaatgg     |
| PRICKLE1_1798 | gccaaagtaactgcatgtttctcCTTCAGCTTCCCGATATCCGACGGTAGTGTtcaaggcagcagaagtgt |
| PRICKLE1_1799 | acgtgaaacagacaaacaggCTTCAGCTTCCCGATATCCGACGGTAGTGTgtgaaggatgacttttt     |
| PRICKLE1_1800 | gagctgctgtgcacctcatcCTTCAGCTTCCCGATATCCGACGGTAGTGTcttttcaatcaaacctat    |
| PRICKLE1_1801 | aacacctgcaactcttttctCTTCAGCTTCCCGATATCCGACGGTAGTGTccacatcactgccacaag    |
| PRICKLE1_1802 | gaagaaagaagcactgggaagCTTCAGCTTCCCGATATCCGACGGTAGTGTgaagtagagaactggtgag  |
| PRICKLE1_1803 | gcaagcaaatagagctggaCTTCAGCTTCCCGATATCCGACGGTAGTGTtcttcttttctaatgac      |
| PRICKLE1_1804 | cagaggaaaagttccttactgtaCTTCAGCTTCCCGATATCCGACGGTAGTGTtagaggcaaacctctgt  |
| PRICKLE1_1805 | aaggccagttgtcatcttCTTCAGCTTCCCGATATCCGACGGTAGTGTctgaaaaacaagagtaaat     |
| PRICKLE1_1806 | ggctgtcagagaagttccacCTTCAGCTTCCCGATATCCGACGGTAGTGTtcaggtttagatgctttg    |



|            |                                                                        |
|------------|------------------------------------------------------------------------|
| SCN8A_1807 | caagaaaccaccaaggccgatCTTCAGCTTCCCGATATCCGACGGTAGTGTaactaacgaagctgctgc  |
| SCN8A_1808 | gcgctctcaatgtttgccagCTTCAGCTTCCCGATATCCGACGGTAGTGTatgtccccgtagatgaaag  |
| SCN8A_1809 | atacctgtttcctaacaggcttCTTCAGCTTCCCGATATCCGACGGTAGTGTggaagcagggaaagatt  |
| SCN8A_1810 | acctgataaagaatagctattCTTCAGCTTCCCGATATCCGACGGTAGTGTgactcataccatgctc    |
| SCN8A_1811 | aatgtacaaggcaggcgtggcCTTCAGCTTCCCGATATCCGACGGTAGTGTccagttgtcaaatattgga |
| SCN8A_1813 | gaagagtcaaggggcaatattCTTCAGCTTCCCGATATCCGACGGTAGTGTaaacaacaagcacacac   |
| SCN8A_1812 | gtgtgtcctgtttgtttaaatCTTCAGCTTCCCGATATCCGACGGTAGTGTgccccctgactcttc     |
| SCN8A_1814 | ggaactggttagattcagtgCTTCAGCTTCCCGATATCCGACGGTAGTGTcagaaattacctcaagct   |
| SCN8A_1815 | cccgtaaaaaggtaaagccatCTTCAGCTTCCCGATATCCGACGGTAGTGTccacaatgcacacctaca  |
| SCN8A_1817 | caaaccaagttaactgtaatggCTTCAGCTTCCCGATATCCGACGGTAGTGTcctaaccaaccctcg    |
| SCN8A_1816 | ggttgggttaggtgtgggCTTCAGCTTCCCGATATCCGACGGTAGTGTaagtaactttggttgatt     |
| SCN8A_1818 | gtgttttgccttgatcggactCTTCAGCTTCCCGATATCCGACGGTAGTGTggggagggttgaggt     |
| SCN8A_1819 | caggcagaactgtcaggaCTTCAGCTTCCCGATATCCGACGGTAGTGTgataactcttccaatcaa     |
| SCN8A_1820 | aaaagtagttggaggccgggCTTCAGCTTCCCGATATCCGACGGTAGTGTtgaaaatggcaccaaagg   |
| SCN8A_1822 | aaagttgaaaggcaggaaaCTTCAGCTTCCCGATATCCGACGGTAGTGTaccctactaataacaggta   |
| SCN8A_1821 | gtacctgttattagtaggctcaaCTTCAGCTTCCCGATATCCGACGGTAGTGTcctgctcttcaaactt  |
| SCN8A_1823 | ccttatgaccaggactattCTTCAGCTTCCCGATATCCGACGGTAGTGTaagctgaaactcccttt     |
| SCN8A_1824 | gaaataatgccaagaaggcccCTTCAGCTTCCCGATATCCGACGGTAGTGTtcttcaataatgtctctc  |
| SCN8A_1825 | gcttatgaagaacagaatcaggCTTCAGCTTCCCGATATCCGACGGTAGTGTactcagaatggccttt   |
| SCN8A_1826 | acagccaagatcaagttcaccCTTCAGCTTCCCGATATCCGACGGTAGTGTagaattcatccaacctg   |
| SCN8A_1827 | gccattggctgatgaaaataaCTTCAGCTTCCCGATATCCGACGGTAGTGTgaagcaacaggaaagaggc |
| SCN8A_1828 | cagctcaaagagtcaaaggaaaCTTCAGCTTCCCGATATCCGACGGTAGTGTcctgctgtggctcttt   |
| SCN8A_1829 | gtttagagattcagaagagctCTTCAGCTTCCCGATATCCGACGGTAGTGTtcttctcatgccattct   |
| SCN8A_1830 | ccatcatgaatcaggtaaacCTTCAGCTTCCCGATATCCGACGGTAGTGTtaggaagaaaaggaaactc  |
| SCN8A_1831 | aatttcctcctattctgttCTTCAGCTTCCCGATATCCGACGGTAGTGTttaaactgaacggctac     |
| SCN8A_1832 | agaatgagttcgggatgacgCTTCAGCTTCCCGATATCCGACGGTAGTGTctctcttccctgtctg     |
| SCN8A_1833 | ggaaccgcccaggtcccctgaaCTTCAGCTTCCCGATATCCGACGGTAGTGTctgtagccgctgtagctg |
| SCN8A_1834 | ggactgcaacggcgtgtgtcCTTCAGCTTCCCGATATCCGACGGTAGTGTtccctcttaccctatcc    |
| SCN8A_1835 | ccgtgctgttgccctcagCTTCAGCTTCCCGATATCCGACGGTAGTGTgctccatctattgtgttc     |
| SCN8A_1836 | cctacgggcggaaggacagaCTTCAGCTTCCCGATATCCGACGGTAGTGTgccagattacctttatag   |
| SCN8A_1837 | atccaggcctttcttcttaaCTTCAGCTTCCCGATATCCGACGGTAGTGTatatctcagcggttggact  |
| SCN8A_1838 | aagagatttgaactgatagtaCTTCAGCTTCCCGATATCCGACGGTAGTGTgaggggccatctttg     |
| SCN8A_1839 | ccagtagggtggcactcccCTTCAGCTTCCCGATATCCGACGGTAGTGTatgttcaaatgtgtgtca    |
| SCN8A_1840 | actgaaagctggagtttcttgaCTTCAGCTTCCCGATATCCGACGGTAGTGTcaatggagcaccatcct  |
| SCN8A_1841 | gttggaacattttgacgattCTTCAGCTTCCCGATATCCGACGGTAGTGTaggcattctcttctact    |
| SCN8A_1842 | atccatggctatgacttcaCTTCAGCTTCCCGATATCCGACGGTAGTGTaatatggaataccaatcggga |
| SCN8A_1843 | gtattttactccaattccagttCTTCAGCTTCCCGATATCCGACGGTAGTGTgctttcagtgctcgat   |
| SCN8A_1844 | ccctgggcaactgacactCTTCAGCTTCCCGATATCCGACGGTAGTGTgagaaaatgattgagat      |
| SCN8A_1845 | accactgaatttccaataatctCTTCAGCTTCCCGATATCCGACGGTAGTGTgaggaggattcacagt   |
| SCN8A_1846 | gactgcatggaagtggcaggCTTCAGCTTCCCGATATCCGACGGTAGTGTaaaagctacaagagtgtgt  |
| SCN8A_1847 | cacatggctcaatccactccCTTCAGCTTCCCGATATCCGACGGTAGTGTccagggttagaatattcag  |
| SCN8A_1848 | gtatcaagaagggtgtggcctCTTCAGCTTCCCGATATCCGACGGTAGTGTctttttccaatgctactg  |
| SCN8A_1849 | gatcactgagatctggaggtgCTTCAGCTTCCCGATATCCGACGGTAGTGTcgatacagttggccttct  |
| SCN8A_1850 | acatcattgatgaggaccacaCTTCAGCTTCCCGATATCCGACGGTAGTGTtctggatgagttgatgaa  |
| SCN8A_1851 | ccaatgccgctggtgtgccCTTCAGCTTCCCGATATCCGACGGTAGTGTctgtaaacctcctgtgtt    |
| SCN8A_1852 | gtgtgagagcaaacagggtgctCTTCAGCTTCCCGATATCCGACGGTAGTGTgactgtacgggtaccat  |
| SCN8A_1853 | gcttcacagaaggtgaaagggCTTCAGCTTCCCGATATCCGACGGTAGTGTtctcttttcttctgctg   |
| SCN8A_1854 | atccaagtattcctcaggctgtCTTCAGCTTCCCGATATCCGACGGTAGTGTcttgaagatagccactga |
| SCN8A_1855 | caactggtttgagaccttcatctCTTCAGCTTCCCGATATCCGACGGTAGTGTtctgaccgctctcc    |
| SCN8A_1856 | cacgatgaggaagcaggtttctCTTCAGCTTCCCGATATCCGACGGTAGTGTgcttttccaactggcct  |
| SCN8A_1857 | gttgctcaagtggacagcctatgCTTCAGCTTCCCGATATCCGACGGTAGTGTgactgtcataggcagc  |
| SCN8A_1858 | ggtgaagactttgtcagcatatCTTCAGCTTCCCGATATCCGACGGTAGTGTagggtgggaaacagaaa  |
| SCN8A_1859 | atttgaaggatgagggttaagataCTTCAGCTTCCCGATATCCGACGGTAGTGTtctctctgtttctg   |
| SCN8A_1860 | gggtctcaaagctcttaggtCTTCAGCTTCCCGATATCCGACGGTAGTGTtctggtttgaatgatctt   |
| SCN8A_1861 | gggaaagtaccactactgctttaaCTTCAGCTTCCCGATATCCGACGGTAGTGTcaacctccccctcaa  |
| SCN8A_1862 | caacaagttaactccatgatgCTTCAGCTTCCCGATATCCGACGGTAGTGTcagttcttccatctg     |
| SCN8A_1863 | aggcagctagcacaataccaCTTCAGCTTCCCGATATCCGACGGTAGTGTgaggggaacaatacagaga  |
| SCN8A_1865 | gtgcctataaaggagtgatggCTTCAGCTTCCCGATATCCGACGGTAGTGTctttccagcactgag     |
| SCN8A_1864 | cagcatggtataccgagcccaCTTCAGCTTCCCGATATCCGACGGTAGTGTtctaataactgactctgtt |
| SCN8A_1866 | cctgttcattggctcatcattCTTCAGCTTCCCGATATCCGACGGTAGTGTctaggagctgattctctt  |
| SCN8A_1867 | cagggtgaagaaggagccgaCTTCAGCTTCCCGATATCCGACGGTAGTGTtttcttctagataggg     |
| SCN8A_1869 | agcccagcttttcatgcaCTTCAGCTTCCCGATATCCGACGGTAGTGTccaatcactaccttttc      |
| SCN8A_1868 | gtaagtgcattgtcaggctgaCTTCAGCTTCCCGATATCCGACGGTAGTGTtctgttttcttctcct    |
| SCN8A_1870 | acactaaagcaagcagatgCTTCAGCTTCCCGATATCCGACGGTAGTGTatcttttcttccctcct     |
| SCN8A_1871 | gtctccacatcattgtcaccaCTTCAGCTTCCCGATATCCGACGGTAGTGTgtccagccaatggtgaa   |

|            |                                                                        |
|------------|------------------------------------------------------------------------|
| SCN8A_1872 | atgagattcccaggagaggaatCTTCAGCTTCCCGATATCCGACGGTAGTGTgctgtgaggcactact   |
| SCN8A_1873 | caaagggattcgtaccctgcCTTCAGCTTCCCGATATCCGACGGTAGGTataacttcttattctct     |
| SCN8A_1874 | cgctttgatcagacgcaagCTTCAGCTTCCCGATATCCGACGGTAGTGTgcttcacatagcaaaattg   |
| SCN8A_1875 | gttgggatggcctgctgctCTTCAGCTTCCCGATATCCGACGGTAGTGTgttcatctctccatttt     |
| SCN8A_1876 | gctgaggtgtgatttgaaacCTTCAGCTTCCCGATATCCGACGGTAGTGTtagcttcaaaagaagaat   |
| SCN8A_1877 | cctctgagtgaggatgacttgaCTTCAGCTTCCCGATATCCGACGGTAGTGTgttgggaaccctcagt   |
| SCN8A_1878 | cactttctctgtggctactactCTTCAGCTTCCCGATATCCGACGGTAGTGTggagaggatgtccaag   |
| SCN8A_1879 | ccttttgccttcaccaagcCTTCAGCTTCCCGATATCCGACGGTAGTGTgagactgttaagctggcag   |
| SCN8A_1880 | atccccctcaccattggcaCTTCAGCTTCCCGATATCCGACGGTAGTGTctcgtaaacactttggaaag  |
| SCN8A_1881 | gcttcatctgcaaaaagacaactCTTCAGCTTCCCGATATCCGACGGTAGTGTgctggtctgtgcatcc  |
| SCN8A_1882 | gccttgcaaatgtccccggCTTCAGCTTCCCGATATCCGACGGTAGTGTtctcctttcaggttagtt    |
| SCN8A_1883 | gaggagaacaaaaattcagtattaCTTCAGCTTCCCGATATCCGACGGTAGTGTtcatctacagctccc  |
| SCN8A_1884 | acacttgattctctgacctCTTCAGCTTCCCGATATCCGACGGTAGTGTgactgttgatagatctt     |
| FOXG1_1885 | ccacggccaccacaacagcaCTTCAGCTTCCCGATATCCGACGGTAGTGTccgtttcccccgagact    |
| FOXG1_1886 | gtcgttctggaccgctcggcCTTCAGCTTCCCGATATCCGACGGTAGTGTgctggtgctgctgctgcg   |
| FOXG1_1887 | cgccgccaccgccaccgcCTTCAGCTTCCCGATATCCGACGGTAGTGTccccgcaaccgcccggccg    |
| FOXG1_1888 | cgggagcagcagctcgtggggcCTTCAGCTTCCCGATATCCGACGGTAGTGTgcttctcttctcgt     |
| FOXG1_1889 | agaagccgctttagctacaacCTTCAGCTTCCCGATATCCGACGGTAGTGTggcccccgtggggcg     |
| FOXG1_1890 | gtacttccgttcttctcctgCTTCAGCTTCCCGATATCCGACGGTAGTGTtcttctcctgctgtagt    |
| FOXG1_1892 | aagcactgttgaggacagattgCTTCAGCTTCCCGATATCCGACGGTAGTGTccccgaggtgggtgga   |
| FOXG1_1891 | actactggatgctggaccctCTTCAGCTTCCCGATATCCGACGGTAGTGTtcatcatgaagaacttc    |
| FOXG1_1893 | gtccctctactggccatgtcCTTCAGCTTCCCGATATCCGACGGTAGTGTgagcagcagctgttcatc   |
| FOXG1_1894 | gctgctcctgaaggtgagcCTTCAGCTTCCCGATATCCGACGGTAGTGTgagcaacagcagctgta     |
| FOXG1_1895 | cggctgtcaacggggagatCTTCAGCTTCCCGATATCCGACGGTAGTGTgagcagcattgagttcaa    |
| FOXG1_1896 | cgggtggagaaggagtggttCTTCAGCTTCCCGATATCCGACGGTAGTGTgaggagtaggtcccagag   |
| FOXG1_1898 | cagggcaccgacaggccgagggcCTTCAGCTTCCCGATATCCGACGGTAGTGTgcccctgggctcat    |
| FOXG1_1897 | gttactttttccccacgtcccCTTCAGCTTCCCGATATCCGACGGTAGTGTcccgtacgccacgac     |
| FOXG1_1899 | gactgtctgattattcacacatcCTTCAGCTTCCCGATATCCGACGGTAGTGTtccgagagcagcag    |
| FOXG1_1900 | ccgtcgtaaaacttggcaaaCTTCAGCTTCCCGATATCCGACGGTAGTGTtatcatttcaaatgaaatg  |
| UBE3A_1917 | agagattgttgaaggccatcaCTTCAGCTTCCCGATATCCGACGGTAGTGTtcaagtgtattccatg    |
| UBE3A_1916 | cacattaaagcaagatgagaCTTCAGCTTCCCGATATCCGACGGTAGTGTtttcttctttttttg      |
| UBE3A_1918 | agagcttttctgttcatctgtCTTCAGCTTCCCGATATCCGACGGTAGTGTcggtaggtatacagtcac  |
| UBE3A_1919 | gcagtttacaacgggcacagCTTCAGCTTCCCGATATCCGACGGTAGTGTatgcaaatataagcttatg  |
| UBE3A_1920 | gcttggaaatctagattctgcaCTTCAGCTTCCCGATATCCGACGGTAGTGTgataaaggctgaagcaa  |
| UBE3A_1921 | gaagaaactcagaatagcaggtCTTCAGCTTCCCGATATCCGACGGTAGTGTgagccggtaagaagaag  |
| UBE3A_1922 | gccttgaactgttttctactCTTCAGCTTCCCGATATCCGACGGTAGTGTcagatagactttttg      |
| UBE3A_1923 | gaggttttcatatggtagcaaaCTTCAGCTTCCCGATATCCGACGGTAGTGTactgtgtttgtttgca   |
| UBE3A_1924 | gatctgtctgatatctggaaCTTCAGCTTCCCGATATCCGACGGTAGTGTacatgcttggaaagtgtt   |
| UBE3A_1925 | ggtaaccaatgatgtatgatCTTCAGCTTCCCGATATCCGACGGTAGTGTtgggtgctcaatttac     |
| UBE3A_1926 | gaccagctactatgccaatcaCTTCAGCTTCCCGATATCCGACGGTAGTGTtataaaaaatgacaaagaa |
| UBE3A_1927 | gtacattttccatggtgtctCTTCAGCTTCCCGATATCCGACGGTAGTGTgagtagttcacatacga    |
| UBE3A_1928 | catataaaacatttaaaataCTTCAGCTTCCCGATATCCGACGGTAGTGTataaaacaaaacattttg   |
| UBE3A_1929 | ccttcaaattccacatacaactCTTCAGCTTCCCGATATCCGACGGTAGTGTctaactcaaaagatgata |
| UBE3A_1930 | aggagttgatgaggaggctCTTCAGCTTCCCGATATCCGACGGTAGTGTttgttttttctgatact     |
| UBE3A_1931 | cactgtacatgcaattctattCTTCAGCTTCCCGATATCCGACGGTAGTGTttaaactagcagcccaa   |
| UBE3A_1932 | acgaagaatcactgttctctacaCTTCAGCTTCCCGATATCCGACGGTAGTGTaaagattatactttt   |
| UBE3A_1933 | gtttccaggggtccactcgaCTTCAGCTTCCCGATATCCGACGGTAGTGTgttctctgtttctattt    |
| UBE3A_1934 | gaacttgggtttaaaccctggCTTCAGCTTCCCGATATCCGACGGTAGTGTgagggacacaaatcacia  |
| UBE3A_1935 | actagattcagactgttaaattcaCTTCAGCTTCCCGATATCCGACGGTAGTGTtggactcagggatggg |
| UBE3A_1936 | aatgatgatgaccattgttgcCTTCAGCTTCCCGATATCCGACGGTAGTGTgccaaggaactgat      |
| UBE3A_1937 | gatattcaggactgtggagattCTTCAGCTTCCCGATATCCGACGGTAGTGTgctgaaatgtctccatc  |
| UBE3A_1938 | ggctttgccatttttgcacCTTCAGCTTCCCGATATCCGACGGTAGTGTgtatattgtcacctaacg    |
| UBE3A_1939 | cagggcctaattttgcaaatCTTCAGCTTCCCGATATCCGACGGTAGTGTtacgtcaagtacattcc    |
| UBE3A_1940 | gtgtctgtggattatgctcCTTCAGCTTCCCGATATCCGACGGTAGTGTaagatgaagatgaaaagga   |
| UBE3A_1941 | agcactagaaaaacttctcaCTTCAGCTTCCCGATATCCGACGGTAGTGTcatagcagcagcaaac     |
| UBE3A_1942 | ggtacagagcttccgaaagCTTCAGCTTCCCGATATCCGACGGTAGTGTctctgattttctagatgta   |
| UBE3A_1943 | cattctaggctcaatatcatctaCTTCAGCTTCCCGATATCCGACGGTAGTGTgaatttcatatacttcc |
| UBE3A_1944 | cctttctggaggatgaggCTTCAGCTTCCCGATATCCGACGGTAGTGTgcaacaattctcaattgaaa   |
| UBE3A_1945 | gcaagctcagcttactctgagCTTCAGCTTCCCGATATCCGACGGTAGTGTcctgacgaatgagtttg   |
| UBE3A_1946 | gcttctgtaccaaacatcaCTTCAGCTTCCCGATATCCGACGGTAGTGTgactgctgattattatcc    |
| UBE3A_1947 | agcagctgcaagcatctaaCTTCAGCTTCCCGATATCCGACGGTAGTGTcttctcatctcacaacag    |
| UBE3A_1949 | gccctagactgttaaatagCTTCAGCTTCCCGATATCCGACGGTAGTGTgaaatggaatattttg      |
| UBE3A_1948 | gtagcaaaatattccatatCTTCAGCTTCCCGATATCCGACGGTAGTGTgacgtaattaaagcagctt   |
| UBE3A_1951 | ccaccattgaaattgtagctcCTTCAGCTTCCCGATATCCGACGGTAGTGTaaacatttctcagaag    |
| UBE3A_1950 | acttctagagaattgttagttaCTTCAGCTTCCCGATATCCGACGGTAGTGTgacaaattcaaatggtg  |

|             |                                                                        |
|-------------|------------------------------------------------------------------------|
| UBE3A_1953  | cagcctttaaaggctgtcattCTTCAGCTTCCCGATATCCGACGGTAGTGTgcctacgctcagatcaag  |
| UBE3A_1952  | gctaccttgatctgagcgtactTCAGCTTCCCGATATCCGACGGTAGTGTtacaatgacagcctttaa   |
| APBA2_1954  | gtcctgtccctcacagccaggCTTCAGCTTCCCGATATCCGACGGTAGTGTctctgtcctccaatgtt   |
| APBA2_1955  | caccctatggtccaacatgcCTTCAGCTTCCCGATATCCGACGGTAGTGTctctgttctctggcgcg    |
| APBA2_1956  | cctctgaggaggagactatgaCTTCAGCTTCCCGATATCCGACGGTAGTGTcccttggaggcctatgtg  |
| APBA2_1957  | gtagtgcagctggagctccatcCTTCAGCTTCCCGATATCCGACGGTAGTGTtcccgttgcagtcca    |
| APBA2_1958  | ggagtggagcactcggcggCTTCAGCTTCCCGATATCCGACGGTAGTGTgggcatcacactacatcc    |
| APBA2_1959  | ccaccgctctggcactcatcCTTCAGCTTCCCGATATCCGACGGTAGTGTtcttctggctatgggcc    |
| APBA2_1960  | cgaggaggccaacgggaacaccCTTCAGCTTCCCGATATCCGACGGTAGTGTaaggcagccaggactacc |
| APBA2_1961  | ggtagtagtctggtagccctctCTTCAGCTTCCCGATATCCGACGGTAGTGTggctcatgctcagactc  |
| APBA2_1962  | catcaaggccagctgcagcccCTTCAGCTTCCCGATATCCGACGGTAGTGTgaggacattgaccagatcg |
| APBA2_1963  | caggcctctacagagtctcagCTTCAGCTTCCCGATATCCGACGGTAGTGTtcttggggtctctgtctt  |
| APBA2_1964  | agggacctcagggtacaggccttCTTCAGCTTCCCGATATCCGACGGTAGTGTaagcaccggagagacc  |
| APBA2_1966  | aacggggaagttaaagatcgtgCTTCAGCTTCCCGATATCCGACGGTAGTGTgatgagtgtccagccca  |
| APBA2_1965  | gttctgggctggaacactcatcCTTCAGCTTCCCGATATCCGACGGTAGTGTcagcatcttaactccc   |
| APBA2_1968  | gtagtagccccaaggtgaCTTCAGCTTCCCGATATCCGACGGTAGTGTtttgatgataaaatgcaactg  |
| APBA2_1967  | gcagttgcatcttatcaaaatCTTCAGCTTCCCGATATCCGACGGTAGTGTacctgtgggctaccta    |
| APBA2_1969  | ctgctatcagaacggaaccctcCTTCAGCTTCCCGATATCCGACGGTAGTGTtcttggcaggcactt    |
| APBA2_1970  | ggtaggaccaggtaatggcaCTTCAGCTTCCCGATATCCGACGGTAGTGTctagtcccccaagtg      |
| APBA2_1972  | gagaaggaaggtgctgaggttCTTCAGCTTCCCGATATCCGACGGTAGTGTccagggaaacacaagcaa  |
| APBA2_1971  | gttttccgtggctgtcctgCTTCAGCTTCCCGATATCCGACGGTAGTGTcacctctctctctctgtg    |
| APBA2_1973  | gcgttaagacagttgtcaaCTTCAGCTTCCCGATATCCGACGGTAGTGTtgggttttggacttaac     |
| APBA2_1974  | atcctctgggtggaatgaagaCTTCAGCTTCCCGATATCCGACGGTAGTGTgagcagagagagaagct   |
| APBA2_1975  | gtcagcctctcaggactgcactCTTCAGCTTCCCGATATCCGACGGTAGTGTtagtgttccctgacgtgg |
| APBA2_1976  | ggccatcagcactacaatgttCTTCAGCTTCCCGATATCCGACGGTAGTGTctggcaaggcttactta   |
| APBA2_1977  | gctgttactgatgtttccagtggCTTCAGCTTCCCGATATCCGACGGTAGTGTctgcatgtgttcgagt  |
| APBA2_1978  | gcgacatcatcaaccaggagaCTTCAGCTTCCCGATATCCGACGGTAGTGTtagctggcctgcctct    |
| APBA2_1979  | cttctggctcaagctctggggCTTCAGCTTCCCGATATCCGACGGTAGTGTgcagaagctggcaaatg   |
| APBA2_1980  | gctccatctgcccaggtgatCTTCAGCTTCCCGATATCCGACGGTAGTGTccttgggctcttggcag    |
| APBA2_1981  | gatctccctctgtgcttctCTTCAGCTTCCCGATATCCGACGGTAGTGTttgatggacatgatggt     |
| APBA2_1982  | cctgcctcactcatccccactCTTCAGCTTCCCGATATCCGACGGTAGTGTggaagctgagatcggg    |
| APBA2_1983  | gtcgagaatggaattgtgagttccCTTCAGCTTCCCGATATCCGACGGTAGTGTactctgtccccgtgc  |
| APBA2_1984  | gaagcccagctggtacttgaggtcCTTCAGCTTCCCGATATCCGACGGTAGTGTccaggtctaccaggc  |
| APBA2_1985  | gatagccaagctctgtccaactCTTCAGCTTCCCGATATCCGACGGTAGTGTgacctggcatgtctg    |
| APBA2_1986  | gctctgcccgtgatctcgatgaCTTCAGCTTCCCGATATCCGACGGTAGTGTggaggctatggagggc   |
| APBA2_1987  | acatcaggccacccagcctCTTCAGCTTCCCGATATCCGACGGTAGTGTgctttcacctgattgtgg    |
| APBA2_1988  | cagcgggctctctgaccgtgaCTTCAGCTTCCCGATATCCGACGGTAGTGTggagccagcctcctgg    |
| CHRNA7_1989 | cccggcacatcccggcgCTTCAGCTTCCCGATATCCGACGGTAGTGTggagcgcggcctcctgctc     |
| CHRNA7_1990 | ccacggaggagtgaggggcggggaCTTCAGCTTCCCGATATCCGACGGTAGTGTgccccaccggctcag  |
| CHRNA7_1991 | gtctacttccctgagcctcctgCTTCAGCTTCCCGATATCCGACGGTAGTGTcccttcccgggtctt    |
| CHRNA7_1992 | gagtggtgagcattggccacCTTCAGCTTCCCGATATCCGACGGTAGTGTcaccgctggcgccc       |
| CHRNA7_1994 | ggtttacaaaagaagaatgagacCTTCAGCTTCCCGATATCCGACGGTAGTGTaagatcttgagccca   |
| CHRNA7_1993 | gctgcaagatcttgacccaCTTCAGCTTCCCGATATCCGACGGTAGTGTtcttcttttgaaccata     |
| CHRNA7_1995 | acatttctctataacagtaagCTTCAGCTTCCCGATATCCGACGGTAGTGTggaagtgaagtctgc     |
| CHRNA7_1996 | aatctggccatctgggaaacCTTCAGCTTCCCGATATCCGACGGTAGTGTcatagataacatccagca   |
| CHRNA7_1998 | aacaggaaaaggactgcatgaCTTCAGCTTCCCGATATCCGACGGTAGTGTgcttctcatttctaactg  |
| CHRNA7_1997 | cagttagaaaactgaagcaggtCTTCAGCTTCCCGATATCCGACGGTAGTGTgagctctttctgtt     |
| CHRNA7_1999 | atctgcagatgcaggaggcagCTTCAGCTTCCCGATATCCGACGGTAGTGTgtcttctgtttccatcacc |
| CHRNA7_2000 | caaggaccagcctcgttaagaCTTCAGCTTCCCGATATCCGACGGTAGTGTcccaaacctttaaagcttg |
| CHRNA7_2001 | ccttcacagtaccatgctcCTTCAGCTTCCCGATATCCGACGGTAGTGTcacattgaaataaacagggt  |
| CHRNA7_2002 | ggctcttgcagcactatagaaCTTCAGCTTCCCGATATCCGACGGTAGTGTccggaatctgcaggag    |
| CHRNA7_2003 | actggagacctctgctgagatCTTCAGCTTCCCGATATCCGACGGTAGTGTctatggcctcaactgct   |
| CHRNA7_2004 | cggtagcattgataggttaaggCTTCAGCTTCCCGATATCCGACGGTAGTGTagaattgagccttctgt  |
| CHRNA7_2005 | ccacgagcagcatgaagacCTTCAGCTTCCCGATATCCGACGGTAGTGTattcttctagttcatctg    |
| CHRNA7_2006 | caagtggttagcttctcccacCTTCAGCTTCCCGATATCCGACGGTAGTGTtccacctgcatctgttc   |
| CHRNA7_2007 | gtcggggtctggtggtggtCTTCAGCTTCCCGATATCCGACGGTAGTGTaaagctatttctttagaat   |
| CHRNA7_2009 | gcctctcattcgaggaaccacCTTCAGCTTCCCGATATCCGACGGTAGTGTcgcggaagccagatgac   |
| CHRNA7_2008 | cctgccaagtggagatgagCTTCAGCTTCCCGATATCCGACGGTAGTGTctcttaactgtctgttgt    |
| CHRNA7_2010 | gatgagcacctcctgcaggCTTCAGCTTCCCGATATCCGACGGTAGTGTgcccgtggcgccgcccgc    |
| CHRNA7_2011 | gctgggggagcaggccatgctCTTCAGCTTCCCGATATCCGACGGTAGTGTtctgctgacagccctcg   |
| CHRNA7_2012 | atctgaccatcgcatcctgatCTTCAGCTTCCCGATATCCGACGGTAGTGTtaggagctccgctacat   |
| CHRNA7_2013 | gcacagcggtcaccacacCTTCAGCTTCCCGATATCCGACGGTAGTGTtctgtgattttccatgct     |
| CHD2_2015   | gtgttcttgaagctctgCTTCAGCTTCCCGATATCCGACGGTAGTGTtagacaaaaggaagaagt      |
| CHD2_2014   | gggagaacctcagcttacaCTTCAGCTTCCCGATATCCGACGGTAGTGTtcccccttaataatgaaga   |
| CHD2_2016   | gcagctcgaatctctgagCTTCAGCTTCCCGATATCCGACGGTAGTGTatttttaactctctctct     |

|           |                                                                         |
|-----------|-------------------------------------------------------------------------|
| CHD2_2017 | gttcgactcgtgccatgtcCTTCAGCTTCCCGATATCCGACGGTAGTGTctttccacatcagctatcc    |
| CHD2_2018 | gttgttcatgaaaactcattagtaCTTCAGCTTCCCGATATCCGACGGTAGTGTgccagctcccagaa    |
| CHD2_2020 | attaagagaccaccgattaatcCTTCAGCTTCCCGATATCCGACGGTAGTGTttaaataatgcatgccctt |
| CHD2_2019 | gggcatgcatttaaactccctaCTTCAGCTTCCCGATATCCGACGGTAGTGTgctgtgctctctaattt   |
| CHD2_2022 | gtgtgtgaggggggaaaaatgCTTCAGCTTCCCGATATCCGACGGTAGTGTgctcagaagaatgctgacaa |
| CHD2_2021 | acttgcagcatttctaggactCTTCAGCTTCCCGATATCCGACGGTAGTGTattttccccctcacac     |
| CHD2_2023 | gggtgactgttgccttaagatCTTCAGCTTCCCGATATCCGACGGTAGTGTactttgtttgctttgat    |
| CHD2_2024 | ggggacaggtctctggcttCTTCAGCTTCCCGATATCCGACGGTAGTGTatctaaaacgcagaatca     |
| CHD2_2025 | aaggcagactcgtcgaagagCTTCAGCTTCCCGATATCCGACGGTAGTGTgactttttgtctctctc     |
| CHD2_2026 | gggagcttcgtcatcatcaCTTCAGCTTCCCGATATCCGACGGTAGTGTtaaagtcacaacccgg       |
| CHD2_2027 | gagttgatgaacagcaagataatCTTCAGCTTCCCGATATCCGACGGTAGTGTggttatgtgtgagctt   |
| CHD2_2028 | gagtcagctcaaaagtcacatCTTCAGCTTCCCGATATCCGACGGTAGTGTaatgtaattgtctccca    |
| CHD2_2029 | caagtgaagggttggcttCTTCAGCTTCCCGATATCCGACGGTAGTGTctctcttcaagtgactta      |
| CHD2_2030 | gaggactggtattcaccttcaCTTCAGCTTCCCGATATCCGACGGTAGTGTaccattgttgatttctg    |
| CHD2_2031 | ggagatcacagctatctagaatCTTCAGCTTCCCGATATCCGACGGTAGTGTgaaggccttaaaaaaac   |
| CHD2_2033 | ggcagacagacagaaaagtaCTTCAGCTTCCCGATATCCGACGGTAGTGTgaagtgaattaccatgta    |
| CHD2_2032 | acatgtaactcactcagccaCTTCAGCTTCCCGATATCCGACGGTAGTGTtttctgtctgtctgcca     |
| CHD2_2035 | aataaaaaaagacagaaaagtCTTCAGCTTCCCGATATCCGACGGTAGTGTgaaaaaaaataatct      |
| CHD2_2034 | attatttgttttccacatgCTTCAGCTTCCCGATATCCGACGGTAGTGTctgtcttattttatttg      |
| CHD2_2036 | aagccctcattgaaaagaatCTTCAGCTTCCCGATATCCGACGGTAGTGTtgacagttgctaactctat   |
| CHD2_2037 | atctcccagctacactctgaCTTCAGCTTCCCGATATCCGACGGTAGTGTtatcttccctgaaaaaa     |
| CHD2_2038 | gctagctcattctggtgcaaCTTCAGCTTCCCGATATCCGACGGTAGTGTtctcagactggcctttg     |
| CHD2_2039 | acctctagctgataatctcgCTTCAGCTTCCCGATATCCGACGGTAGTGTgatacaataagggtgtaa    |
| CHD2_2040 | caccagctgtatggccccttCTTCAGCTTCCCGATATCCGACGGTAGTGTggtgaactaatgattttt    |
| CHD2_2041 | ggtggaacaggtaggagaggCTTCAGCTTCCCGATATCCGACGGTAGTGTtatttctgctcatcaggtca  |
| CHD2_2042 | gatcatcagtaaaatttgggttCTTCAGCTTCCCGATATCCGACGGTAGTGTgcaccagagattaactg   |
| CHD2_2044 | gcgtgaactcaatctttgCTTCAGCTTCCCGATATCCGACGGTAGTGTatttcaaatgctccac        |
| CHD2_2043 | gtaataatctaaaaggctaaCTTCAGCTTCCCGATATCCGACGGTAGTGTagaattatgtcttaat      |
| CHD2_2046 | gagtcactcttcaaccgagctCTTCAGCTTCCCGATATCCGACGGTAGTGTggagctactctccgg      |
| CHD2_2045 | ccataggctcctgattaccggCTTCAGCTTCCCGATATCCGACGGTAGTGTcgtctgtttttttac      |
| CHD2_2047 | gggaaagcaaaagctcaaatCTTCAGCTTCCCGATATCCGACGGTAGTGTctctgtgctcatttattat   |
| CHD2_2048 | cggagagcaaaaaagatgtgCTTCAGCTTCCCGATATCCGACGGTAGTGTaatgtggctaaataact     |
| CHD2_2049 | agaaggaaaaggcttagcactCTTCAGCTTCCCGATATCCGACGGTAGTGTaacccctcaggcctaac    |
| CHD2_2050 | aaatgttgcaaccactgctaCTTCAGCTTCCCGATATCCGACGGTAGTGTgtttttttgtatctagtag   |
| CHD2_2051 | cagatgtgctccttcttCTTCAGCTTCCCGATATCCGACGGTAGTGTgagaagaatgaggaa          |
| CHD2_2052 | acttcgaaaaaggggaatcCTTCAGCTTCCCGATATCCGACGGTAGTGTaaatgagttttagagat      |
| CHD2_2053 | atcaactcccactgctccttCTTCAGCTTCCCGATATCCGACGGTAGTGTaccttacctggaaggata    |
| CHD2_2054 | gctttgctgttaaagtaggaaCTTCAGCTTCCCGATATCCGACGGTAGTGTggatctcctgctgaata    |
| CHD2_2056 | aaataaacccaagaaaactgtaaCTTCAGCTTCCCGATATCCGACGGTAGTGTctgtgagagccca      |
| CHD2_2055 | gggctctgcatcaaggggaaCTTCAGCTTCCCGATATCCGACGGTAGTGTttttctgtgtttttt       |
| CHD2_2057 | gaatgacttcagggcacaagCTTCAGCTTCCCGATATCCGACGGTAGTGTcactgcataaagtagtatat  |
| CHD2_2058 | gggggttccagtcagagcaaaCTTCAGCTTCCCGATATCCGACGGTAGTGTtaacatcctgaaagggc    |
| CHD2_2060 | ccgttctatgatctcctctcCTTCAGCTTCCCGATATCCGACGGTAGTGTttgattctgctcactc      |
| CHD2_2059 | cagcgcagtgacaccactggCTTCAGCTTCCCGATATCCGACGGTAGTGTggttcaggcataagcata    |
| CHD2_2062 | gaagtaaatgtagttgtagaaCTTCAGCTTCCCGATATCCGACGGTAGTGTaatttccctctctcat     |
| CHD2_2061 | caatgaggagagggaatttCTTCAGCTTCCCGATATCCGACGGTAGTGTtcaaaactacatttact      |
| CHD2_2064 | gaacaaaagccaacagaataCTTCAGCTTCCCGATATCCGACGGTAGTGTctgagaactctcccaca     |
| CHD2_2063 | gtgggagagagttctcagcatCTTCAGCTTCCCGATATCCGACGGTAGTGTctgtgtggctttgtct     |
| CHD2_2065 | agagcggcagaaggagctagCTTCAGCTTCCCGATATCCGACGGTAGTGTcagacaaatgggtgtctgtt  |
| CHD2_2066 | cctttgtccttggaaatgatCTTCAGCTTCCCGATATCCGACGGTAGTGTgcattcacaacataagaaa   |
| CHD2_2067 | agaagccaaagcgcagagggCTTCAGCTTCCCGATATCCGACGGTAGTGTtgttaccagtgactttgc    |
| CHD2_2068 | cagagtcttcttctcactctcCTTCAGCTTCCCGATATCCGACGGTAGTGTgactttcaaacaaagctc   |
| CHD2_2070 | gttgatctagcatatcctgtCTTCAGCTTCCCGATATCCGACGGTAGTGTaagaggaagaaaggact     |
| CHD2_2069 | gtcccttatcttcttcttCTTCAGCTTCCCGATATCCGACGGTAGTGTgatgtgtagcatcaaca       |
| CHD2_2071 | caatgcaggaatatgaagagcaCTTCAGCTTCCCGATATCCGACGGTAGTGTggtcctaaagtgtcccca  |
| CHD2_2072 | caatgcaggaatacgaagagcaCTTCAGCTTCCCGATATCCGACGGTAGTGTggtcctaaagtgtcccca  |
| CHD2_2073 | gatcagttcaccaggcctCTTCAGCTTCCCGATATCCGACGGTAGTGTcttttagcaacagaaatccag   |
| CHD2_2074 | ccaacatgaagaggagttgaCTTCAGCTTCCCGATATCCGACGGTAGTGTttttctgtggaactctg     |
| CHD2_2075 | caattaacctgaactcggCTTCAGCTTCCCGATATCCGACGGTAGTGTcaaatctatttctcaggt      |
| CHD2_2076 | ggctatggaaactgggagttCTTCAGCTTCCCGATATCCGACGGTAGTGTcctcttctaagtctctc     |
| CHD2_2077 | cgagaatcatcttccacccCTTCAGCTTCCCGATATCCGACGGTAGTGTattacacaacaaatcttct    |
| CHD2_2078 | gacaggtgggaagaggtgaCTTCAGCTTCCCGATATCCGACGGTAGTGTgctctctcttcttctgt      |
| CHD2_2079 | cagccccttcttctccagacCTTCAGCTTCCCGATATCCGACGGTAGTGTcatgagaaggtgacattct   |
| CHD2_2080 | catcagaagaggagaagtgaCTTCAGCTTCCCGATATCCGACGGTAGTGTatcatcatttctctcctt    |
| CHD2_2081 | gtcaattcatgctctctCTTCAGCTTCCCGATATCCGACGGTAGTGTttcagatgattttattcca      |

|             |                                                                         |
|-------------|-------------------------------------------------------------------------|
| CHD2_2083   | gttctcctgttctcttctcttCCTCAGCTTCCCGATATCCGACGGTAGTGTggcgaattgcaaggct     |
| CHD2_2082   | aaggggacaaggaagaaagaCTTCAGCTTCCCGATATCCGACGGTAGTGTtagcaaaaattcatagccc   |
| CHD2_2084   | atgatctggaccaggagacatCTTCAGCTTCCCGATATCCGACGGTAGTGTactccttgaactctttt    |
| CHD2_2085   | atcctcatctctcaatgggCTTCAGCTTCCCGATATCCGACGGTAGTGTattgcttagctcaactgaa    |
| CHD2_2086   | acgtgcaagaacagctggaaCTTCAGCTTCCCGATATCCGACGGTAGTGTaagcaaaagacaagactta   |
| CHD2_2087   | agccccctgtcaggtttgtcgCTTCAGCTTCCCGATATCCGACGGTAGTGTgaggcgaagtggttacct   |
| CHD2_2088   | gcacaactcatctattggcaataCTTCAGCTTCCCGATATCCGACGGTAGTGTgacatcaaaactctgga  |
| CHD2_2089   | cataagttatacaagatggctcaCTTCAGCTTCCCGATATCCGACGGTAGTGTcttggccatcatgaaga  |
| CHD2_2090   | gttttcgagcatcaaattctgCTTCAGCTTCCCGATATCCGACGGTAGTGTccatggaaaaacaaaatt   |
| CHD2_2091   | ccttcaccctcagaagcctcaCTTCAGCTTCCCGATATCCGACGGTAGTGTcttggttccttttact     |
| CHD2_2092   | gtgtgaggtatgggactgagaCTTCAGCTTCCCGATATCCGACGGTAGTGTaaaactccacttaatgacc  |
| CHD2_2093   | ggctagactctgtgctttatCTTCAGCTTCCCGATATCCGACGGTAGTGTaccgaagagataactaciaa  |
| CHD2_2094   | gaccaccattatggggaccgCTTCAGCTTCCCGATATCCGACGGTAGTGTcagatcattcttcttttcc   |
| CHD2_2095   | gtaccagtgtctcactactgatCTTCAGCTTCCCGATATCCGACGGTAGTGTtctgtgtcccgggtgt    |
| CHD2_2096   | gtttctaggagaaagtgcgCTTCAGCTTCCCGATATCCGACGGTAGTGTccaacaacatgtccagaa     |
| CHD2_2098   | cggaaatcctgtggtggaattCTTCAGCTTCCCGATATCCGACGGTAGTGTgagactgcagggtgcaa    |
| CHD2_2097   | catggccaggaccctcagacCTTCAGCTTCCCGATATCCGACGGTAGTGTactaatcctgtcatctcta   |
| CHD2_2100   | atccaggggtgactggaatCTTCAGCTTCCCGATATCCGACGGTAGTGTtagaccaaaaatcacctgtg   |
| CHD2_2099   | aacaaccagattataactggaatCTTCAGCTTCCCGATATCCGACGGTAGTGTaacagcctctaccctcc  |
| PNPO_2132   | agtcaactgtgtggtcgagCTTCAGCTTCCCGATATCCGACGGTAGTGTtgggttcgaaactcaaaagg   |
| PNPO_2133   | aggtagcctggcactcggcaggCTTCAGCTTCCCGATATCCGACGGTAGTGTctccggggaccctttt    |
| PNPO_2134   | cctgacataggggaagccaaCTTCAGCTTCCCGATATCCGACGGTAGTGTtccatagtaagcactatat   |
| PNPO_2135   | cactgaacagcctctcaaacCTTCAGCTTCCCGATATCCGACGGTAGTGTaattggcatccagagtag    |
| PNPO_2137   | agcaaaagagcagagcactgtCTTCAGCTTCCCGATATCCGACGGTAGTGTgaaagattactagctctttt |
| PNPO_2136   | aaaagagctagtaattctttccaCTTCAGCTTCCCGATATCCGACGGTAGTGTgtctgtcttttct      |
| PNPO_2139   | agtaaaagagaatccacagccaCTTCAGCTTCCCGATATCCGACGGTAGTGTctagacgtagccataaac  |
| PNPO_2138   | gtttatggctacgtctagcgtCTTCAGCTTCCCGATATCCGACGGTAGTGTgctgtggattctcttttact |
| PNPO_2140   | agccaccagagttctgtgatCTTCAGCTTCCCGATATCCGACGGTAGTGTatttaagcattcaccag     |
| PNPO_2141   | gggagtggaagtagcactcagcCTTCAGCTTCCCGATATCCGACGGTAGTGTggcagcctctggggata   |
| PNPO_2143   | cagggggaagagttagaagaaggCTTCAGCTTCCCGATATCCGACGGTAGTGTgtaaacacaggggctg   |
| PNPO_2142   | caggccccctgtttactttaaCTTCAGCTTCCCGATATCCGACGGTAGTGTttctaactcttccccctg   |
| PNPO_2144   | gcctaccacaggagattccccCTTCAGCTTCCCGATATCCGACGGTAGTGTtagaaaactccacagagc   |
| PNPO_2145   | ggttggttgaccttgcagaacCTTCAGCTTCCCGATATCCGACGGTAGTGTccagcaggtcccagagt    |
| PNPO_2146   | cccttatcttcagactcttcaCTTCAGCTTCCCGATATCCGACGGTAGTGTtctatgagagactgtcac   |
| ZNF532_2238 | ccatgaaagccacatgaagcagCTTCAGCTTCCCGATATCCGACGGTAGTGTtaacagaaactctgtctca |
| ZNF532_2239 | gtccagactcaatagctgttttagCTTCAGCTTCCCGATATCCGACGGTAGTGTgccctcggaagagtca  |
| ZNF532_2240 | gagcaaaagtccttgaaggagCTTCAGCTTCCCGATATCCGACGGTAGTGTcgttatctgcaagaatggt  |
| ZNF532_2241 | gtaactgtcaagggaggatctgCTTCAGCTTCCCGATATCCGACGGTAGTGTcctaacttctctgctgt   |
| ZNF532_2242 | aggcactcggagggaactCTTCAGCTTCCCGATATCCGACGGTAGTGTcagtgctgaaggtttgat      |
| ZNF532_2243 | gcttatctgtatctgtctgCTTCAGCTTCCCGATATCCGACGGTAGTGTctttaaagggttcataaaca   |
| ZNF532_2244 | atgacaccagcctccccagcCTTCAGCTTCCCGATATCCGACGGTAGTGTcagaagcagttctataaac   |
| ZNF532_2245 | cggagctcagcttccactcaCTTCAGCTTCCCGATATCCGACGGTAGTGTggttcttgcaggagtct     |
| ZNF532_2246 | atctcatcgacgggacaaaaCTTCAGCTTCCCGATATCCGACGGTAGTGTgctctcagcgtaaaaag     |
| ZNF532_2247 | gcggctctcggactgtcatttacCTTCAGCTTCCCGATATCCGACGGTAGTGTgacctcgggagagga    |
| ZNF532_2248 | cagggtattgccaagaagtgaCTTCAGCTTCCCGATATCCGACGGTAGTGTcccagaagcatctcaagtg  |
| ZNF532_2249 | gttctctgatttccccagaagaCTTCAGCTTCCCGATATCCGACGGTAGTGTggagaggaaagcagggc   |
| ZNF532_2250 | aagcctgtggctactgtcttctCTTCAGCTTCCCGATATCCGACGGTAGTGTctgtgacatcctctgtc   |
| ZNF532_2251 | acctgttgggggtgagctctCTTCAGCTTCCCGATATCCGACGGTAGTGTggacagaggcagagatat    |
| ZNF532_2252 | caaaactgtccaagaactgtCTTCAGCTTCCCGATATCCGACGGTAGTGTaaacaaccacggtgaaag    |
| ZNF532_2253 | atgccgcaccacagactgtCTTCAGCTTCCCGATATCCGACGGTAGTGTcctgctttattgtgctga     |
| ZNF532_2254 | caacaaggtgctgagcaggtctCTTCAGCTTCCCGATATCCGACGGTAGTGTccaagtgtcaacaaac    |
| ZNF532_2255 | aagcttccaccagaaactctgCTTCAGCTTCCCGATATCCGACGGTAGTGTagtcaaaaggatcccca    |
| ZNF532_2256 | atgacgctcttccatgctCTTCAGCTTCCCGATATCCGACGGTAGTGTgggtacaaggtcttggagt     |
| ZNF532_2257 | gtaaaaaacagaggtctttgtacCTTCAGCTTCCCGATATCCGACGGTAGTGTggaagtattgttgacg   |
| ZNF532_2258 | ccttcaagcactccatcaacCTTCAGCTTCCCGATATCCGACGGTAGTGTgcagatcaaatgatagtttc  |
| ZNF532_2259 | gccgatgatgactgtcccagttaCTTCAGCTTCCCGATATCCGACGGTAGTGTgaaatgtgtgaccagtga |
| ZNF532_2260 | gtaggcatgagtgcttgataCTTCAGCTTCCCGATATCCGACGGTAGTGTagtctaaaatggttggagt   |
| ZNF532_2261 | catctgcaggtcgtgcaactCTTCAGCTTCCCGATATCCGACGGTAGTGTgtttcccccttgggttg     |
| ZNF532_2262 | acactcagggcaggttagggCTTCAGCTTCCCGATATCCGACGGTAGTGTcggttgtaagtgaacaggt   |
| ZNF532_2263 | gtttaagctgtccccaaagcacCTTCAGCTTCCCGATATCCGACGGTAGTGTgacctgtgtttatttt    |
| ZNF532_2264 | actgtagaagacttcacagtgCTTCAGCTTCCCGATATCCGACGGTAGTGTaaagcagtgaggataaac   |
| ZNF532_2265 | gtccagactgttcttttataCTTCAGCTTCCCGATATCCGACGGTAGTGTtctgctcactcttctat     |
| ZNF532_2266 | gaaaaacagacacttctggtCTTCAGCTTCCCGATATCCGACGGTAGTGTgctcagccttgattatga    |
| ZNF532_2267 | cctgcaactcaaaattcagcaCTTCAGCTTCCCGATATCCGACGGTAGTGTgtgcttcttttagtgtt    |
| ZNF532_2268 | gtcaaaaggcaagttatacccCTTCAGCTTCCCGATATCCGACGGTAGTGTggccacttcttggttt     |

|             |                                                                         |
|-------------|-------------------------------------------------------------------------|
| ZNF532_2269 | gtcagtaaaagatgaaagctgcCTTCAGCTTCCCGATATCCGACGGTAGTGTtccatctctgtgaaaaa   |
| ZNF532_2270 | cccgtctccttctcacgtCTTCAGCTTCCCGATATCCGACGGTAGTGTcaccaagtgttttaaggt      |
| ZNF532_2272 | cacaggctgtgggacgagctCTTCAGCTTCCCGATATCCGACGGTAGTGTagttaattgtactactactaa |
| ZNF532_2271 | cctgtcctaagtctgtttcCTTCAGCTTCCCGATATCCGACGGTAGTGTgtaacttctctctctc       |
| ZNF532_2273 | ccaccaatgaggaggaacacagaaCTTCAGCTTCCCGATATCCGACGGTAGTGTctcctgtccttcccc   |
| ZNF532_2274 | gtcatttcttcaggtcaggCTTCAGCTTCCCGATATCCGACGGTAGTGTcaacaaaaactgaaagga     |
| ZNF532_2275 | gttcacaagtgtccgtgtgtCTTCAGCTTCCCGATATCCGACGGTAGTGTgtcatttgccttctttcc    |
| ZNF532_2276 | aaacattgatttccagcttttcaCTTCAGCTTCCCGATATCCGACGGTAGTGTcgtgttagcagaggcca  |
| ZNF532_2277 | ataaccaacaggagaacaaaccCTTCAGCTTCCCGATATCCGACGGTAGTGTggttctctaccagctgc   |
| ZNF532_2278 | ccccagccccatttgccttggCTTCAGCTTCCCGATATCCGACGGTAGTGTgtcccatgtgagttatt    |
| ZNF532_2279 | gtccacattggaataaaaaagacCTTCAGCTTCCCGATATCCGACGGTAGTGTgcgcaaaaaactttgaa  |
| PNKP_2333   | gttggggcctgaactcttcCTTCAGCTTCCCGATATCCGACGGTAGTGTacagcgtttattgtggagg    |
| PNKP_2334   | atcccgttccggctatgggtggCTTCAGCTTCCCGATATCCGACGGTAGTGTgttggggatagcaggggg  |
| PNKP_2335   | actgtggggaaactcagaggggCTTCAGCTTCCCGATATCCGACGGTAGTGTaacagttagggacagcct  |
| PNKP_2336   | ccttcatatccccgtgtcagacCTTCAGCTTCCCGATATCCGACGGTAGTGTccacaacaaccgggtga   |
| PNKP_2337   | gcacactggagctactctgtCTTCAGCTTCCCGATATCCGACGGTAGTGTaggggaggaggggggctagg  |
| PNKP_2338   | cgagccgaggcctcccctCTTCAGCTTCCCGATATCCGACGGTAGTGTtcatcgacaacacaaacca     |
| PNKP_2340   | gacccgcgagccgcccaggCTTCAGCTTCCCGATATCCGACGGTAGTGTcctgggtctgcccagctgt    |
| PNKP_2339   | gtctcacagctgttcacacagcCTTCAGCTTCCCGATATCCGACGGTAGTGTagtctgtgtcagggcc    |
| PNKP_2342   | ccccaaatcttataaagtctcccCTTCAGCTTCCCGATATCCGACGGTAGTGTccccgctgggtccta    |
| PNKP_2341   | gggtggcctaggaccaggcCTTCAGCTTCCCGATATCCGACGGTAGTGTtagtgggaacttataatag    |
| PNKP_2344   | gttctgtgcgctgccctgCTTCAGCTTCCCGATATCCGACGGTAGTGTacgctgtcccccccccctc     |
| PNKP_2343   | ggggcggggacacgcctgaCTTCAGCTTCCCGATATCCGACGGTAGTGTgggcacgcgacaggaacag    |
| PNKP_2345   | gttgagggcaaacatagggttagCTTCAGCTTCCCGATATCCGACGGTAGTGTcggggagcctcccat    |
| PNKP_2346   | cccttcgccacgctgaggaCTTCAGCTTCCCGATATCCGACGGTAGTGTcggaagaagaagacttct     |
| PNKP_2347   | gtctggaacacacgggacaccCTTCAGCTTCCCGATATCCGACGGTAGTGTgacgaacatcagacacagg  |
| PNKP_2348   | cgcccggccaactggggcccCTTCAGCTTCCCGATATCCGACGGTAGTGTgcacgccatcatcctcgg    |
| PNKP_2349   | ggccctccacaatgtccccCTTCAGCTTCCCGATATCCGACGGTAGTGTtcccaccagctcggagg      |
| PNKP_2352   | gccccgccccctcttcccCTTCAGCTTCCCGATATCCGACGGTAGTGTgcttggggggagctaaag      |
| PNKP_2351   | cagcttagctccccctcaagcaCTTCAGCTTCCCGATATCCGACGGTAGTGTgaaagggaggggccg     |
| PNKP_2354   | gaggagttaagccaaggtggagCTTCAGCTTCCCGATATCCGACGGTAGTGTgtgcacgtggcggtcc    |
| PNKP_2353   | agatcaccagctggggagcaagCTTCAGCTTCCCGATATCCGACGGTAGTGTacatagctcccagcctc   |
| PNKP_2355   | actccaggcctcactcactcctCTTCAGCTTCCCGATATCCGACGGTAGTGTcatgcagacagcgct     |
| PNKP_2357   | ctggcccgggtcaccCTTCAGCTTCCCGATATCCGACGGTAGTGTgacaccaggtggctgcttgat      |
| PNKP_2358   | ttactcctcctcagcCTTCAGCTTCCCGATATCCGACGGTAGTGTtggatgagcgtcccgtcc         |
| PNKP_2359   | gcccgggttactcgcataCTTCAGCTTCCCGATATCCGACGGTAGTGTgagcacgcaacaaactgt      |
| PNKP_2360   | ggagaacttggaaggtgctagtCTTCAGCTTCCCGATATCCGACGGTAGTGTcgtgggaagagacc      |
| PNKP_2361   | cccgtagttaggggttaactcCTTCAGCTTCCCGATATCCGACGGTAGTGTtagtattcgtctggatt    |
| PNKP_2362   | gaggctctctgggggtgggCTTCAGCTTCCCGATATCCGACGGTAGTGTgattttccgctggattt      |
| PNKP_2364   | gcaaggcctggggatgggattCTTCAGCTTCCCGATATCCGACGGTAGTGTgaaatcaggaccatca     |
| PNKP_2363   | attgggtccctcatttctggggaCTTCAGCTTCCCGATATCCGACGGTAGTGTatcccaggccttctgt   |
| PNKP_2365   | ccgagggcaggaagatggggCTTCAGCTTCCCGATATCCGACGGTAGTGTtctggattgtccccttt     |
| PNKP_2366   | gcaggggaccctgaccaggctCTTCAGCTTCCCGATATCCGACGGTAGTGTttactctctcccagg      |
| EPN1_2368   | ccaagaagccacagagggagaCTTCAGCTTCCCGATATCCGACGGTAGTGTccatgattcatagccacc   |
| EPN1_2367   | gtgaggtggctatgaatcatCTTCAGCTTCCCGATATCCGACGGTAGTGTaatcccctctgtggcttc    |
| EPN1_2370   | cagcacaagagggacattaccttCTTCAGCTTCCCGATATCCGACGGTAGTGTgcccaggaagaaccg    |
| EPN1_2369   | gtgggctgttagttcttctCTTCAGCTTCCCGATATCCGACGGTAGTGTcattctgtgtgtga         |
| EPN1_2371   | cccctctgcttcttccagaggCTTCAGCTTCCCGATATCCGACGGTAGTGTgacgctgtgtctctgg     |
| EPN1_2372   | cacgcatcggggcctgtgCTTCAGCTTCCCGATATCCGACGGTAGTGTactcatctttgacctgagg     |
| EPN1_2373   | cggcaggtctggcaggtcaCTTCAGCTTCCCGATATCCGACGGTAGTGTctctgagtgttggacga      |
| EPN1_2374   | gttctgccttctcggagatcatCTTCAGCTTCCCGATATCCGACGGTAGTGTaggccagatgaagaa     |
| EPN1_2375   | gtaggtgaggtcggcaatctctCTTCAGCTTCCCGATATCCGACGGTAGTGTactgagcccctgacc     |
| EPN1_2376   | ggagaacatgtacgctgagcaCTTCAGCTTCCCGATATCCGACGGTAGTGTcgcaggcagctctctgg    |
| EPN1_2377   | ccggtctgatgaggtactcctCTTCAGCTTCCCGATATCCGACGGTAGTGTaccagctgcttagcttt    |
| EPN1_2378   | caaggaaaagctggcacagaccCTTCAGCTTCCCGATATCCGACGGTAGTGTaggacttccagtctgg    |
| EPN1_2379   | gagcgcgtgcccctcttCTTCAGCTTCCCGATATCCGACGGTAGTGTcctggctgggagagaagca      |
| EPN1_2380   | gctggcctggccatgagcaaCTTCAGCTTCCCGATATCCGACGGTAGTGTtctccctggtctgggtctc   |
| EPN1_2381   | ggagctgcagctctctctcCTTCAGCTTCCCGATATCCGACGGTAGTGTagtggagccagggccacgc    |
| EPN1_2382   | catgaaggtcagagacgctcCTTCAGCTTCCCGATATCCGACGGTAGTGTgctctgcctctgactct     |
| EPN1_2383   | cggctcaaaactaaggccagctCTTCAGCTTCCCGATATCCGACGGTAGTGTgagcctgtggcttcgg    |
| EPN1_2385   | gcacgaccagggagatgagaaCTTCAGCTTCCCGATATCCGACGGTAGTGTggccagggaggcagaa     |
| EPN1_2384   | gcttctctgctctcctggccCTTCAGCTTCCCGATATCCGACGGTAGTGTtctcatgtctcctggt      |
| EPN1_2386   | ccccacctcggaccctggCTTCAGCTTCCCGATATCCGACGGTAGTGTctcctctctctctctccc      |
| EPN1_2387   | gccgtgggacggcagcagcatCTTCAGCTTCCCGATATCCGACGGTAGTGTcaactgaggtctctgc     |
| EPN1_2389   | caggggctggggtcccccccCTTCAGCTTCCCGATATCCGACGGTAGTGTcagctgtcccgtccaag     |

|            |                                                                        |
|------------|------------------------------------------------------------------------|
| EPN1_2388  | ggaagtccgatggtagtgcgtCTTCAGCTTCCCGATATCCGACGGTAGTGTggaggtccagccccac    |
| EPN1_2391  | ccggggccggtgtccaggaCTTCAGCTTCCCGATATCCGACGGTAGTGTcccttaggacactcaacac   |
| EPN1_2390  | acaggtactggaatgggggtggCTTCAGCTTCCCGATATCCGACGGTAGTGTcatgctctctgctca    |
| EPN1_2393  | atgttctgctcagcccctcctgCTTCAGCTTCCCGATATCCGACGGTAGTGTccactgggcagggagg   |
| EPN1_2392  | ctccccctgccagtgccagCTTCAGCTTCCCGATATCCGACGGTAGTGTgaggggctgagcagaacat   |
| EPN1_2394  | gacatgagtggggtcagggCTTCAGCTTCCCGATATCCGACGGTAGTGTatgatggctatactgctc    |
| EPN1_2395  | cagggcttcggggccacctCTTCAGCTTCCCGATATCCGACGGTAGTGTggctgattggccccagg     |
| EPN1_2396  | ggtgagtggtggccatcacctgCTTCAGCTTCCCGATATCCGACGGTAGTGTccccaccgggaagac    |
| EPN1_2397  | caggaaggggtggagccctggCTTCAGCTTCCCGATATCCGACGGTAGTGTcgcagcccactgtgtc    |
| EPN1_2398  | gcgccaccacgtacatctcCTTCAGCTTCCCGATATCCGACGGTAGTGTgtctctggttactcttc     |
| EPN1_2399  | actgagacggagctggtcagCTTCAGCTTCCCGATATCCGACGGTAGTGTgccttggattataggagga  |
| EPN1_2400  | cagtgccctccccctcctggCTTCAGCTTCCCGATATCCGACGGTAGTGTggccccaacactaatcc    |
| PLCB1_2401 | ccaaattcgtcaagtgggatgatCTTCAGCTTCCCGATATCCGACGGTAGTGTccccagctcctgccgc  |
| PLCB1_2402 | gctgtcggacacgcacacgggctcCTTCAGCTTCCCGATATCCGACGGTAGTGTattgataaacgcgcc  |
| PLCB1_2404 | aatgtaagaagaacatgaatCTTCAGCTTCCCGATATCCGACGGTAGTGTtagtagtaaacgactgaaa  |
| PLCB1_2403 | cattttcagtcgttactactCTTCAGCTTCCCGATATCCGACGGTAGTGTattcatgtttctcttac    |
| PLCB1_2406 | gtgaaatcgttaagcaacgacacCTTCAGCTTCCCGATATCCGACGGTAGTGTcaatcaaggcagcatct |
| PLCB1_2405 | cagatgtgcttgattgttggCTTCAGCTTCCCGATATCCGACGGTAGTGTcgttgcttaacgatttca   |
| PLCB1_2407 | cctcgtgaacatctcccattCTTCAGCTTCCCGATATCCGACGGTAGTGTgttggaaatctctagtatag |
| PLCB1_2408 | gtgatcatgctgctccagCTTCAGCTTCCCGATATCCGACGGTAGTGTatgatagctcaaggattcag   |
| PLCB1_2409 | aagcgttaagctacttaattttCTTCAGCTTCCCGATATCCGACGGTAGTGTgtcctaagctgtgccagt |
| PLCB1_2410 | ccagaaatgcatcctggacCTTCAGCTTCCCGATATCCGACGGTAGTGTccaaaggaaaattgtgttt   |
| PLCB1_2412 | gagaagcagaaaaaagggttCTTCAGCTTCCCGATATCCGACGGTAGTGTtagagccatggcatggatt  |
| PLCB1_2411 | atctgaatccatgcatgctCTTCAGCTTCCCGATATCCGACGGTAGTGTcaaaccttgttttctgctc   |
| PLCB1_2414 | aagtgaacacacaaaggagagCTTCAGCTTCCCGATATCCGACGGTAGTGTttggaggggctgaac     |
| PLCB1_2413 | gttcagcccccaaaactactCTTCAGCTTCCCGATATCCGACGGTAGTGTcctttgtgtgtcactt     |
| PLCB1_2415 | gtaaggtacacatttaagccaCTTCAGCTTCCCGATATCCGACGGTAGTGTttgctgactcctgtgtt   |
| PLCB1_2416 | gatgttcaatttcagctgaCTTCAGCTTCCCGATATCCGACGGTAGTGTgtcttttagacacagctg    |
| PLCB1_2417 | caagagcaagccaagattgCTTCAGCTTCCCGATATCCGACGGTAGTGTttgctgttctgtctg       |
| PLCB1_2418 | agggtgataaagtatttctaagCTTCAGCTTCCCGATATCCGACGGTAGTGTgctgtgactaccccc    |
| PLCB1_2419 | gcccccttctactatttcatCTTCAGCTTCCCGATATCCGACGGTAGTGTgattcacatcctttctaa   |
| PLCB1_2420 | cattcaaatccagtttctcaggCTTCAGCTTCCCGATATCCGACGGTAGTGTcagaagtagagttggt   |
| PLCB1_2421 | gaacctgtcatccatggctCTTCAGCTTCCCGATATCCGACGGTAGTGTggtttgtttgttgggttt    |
| PLCB1_2422 | gcagtcctgctcctccagcaCTTCAGCTTCCCGATATCCGACGGTAGTGTtaccttaggagccttaacc  |
| PLCB1_2423 | gcagtcctgctcctccagcaCTTCAGCTTCCCGATATCCGACGGTAGTGTtaccttaggagccttaacc  |
| PLCB1_2425 | atgagaacacatgtatattcagCTTCAGCTTCCCGATATCCGACGGTAGTGTcgggaaaagactcat    |
| PLCB1_2424 | ggaatgagctttttccgaCTTCAGCTTCCCGATATCCGACGGTAGTGTactgaatatacatgtgtct    |
| PLCB1_2427 | ggagaacaagaacagaagaaggCTTCAGCTTCCCGATATCCGACGGTAGTGTgcatatacttctcaag   |
| PLCB1_2426 | gtccttgaaggaaatgatgcaCTTCAGCTTCCCGATATCCGACGGTAGTGTccttctctgttctgttc   |
| PLCB1_2428 | gctctcagaacaagcctccaCTTCAGCTTCCCGATATCCGACGGTAGTGTagaatgctttcatttct    |
| PLCB1_2429 | ccgcttctctgatgactCTTCAGCTTCCCGATATCCGACGGTAGTGTcaattctaaacacacaa       |
| PLCB1_2431 | acagatcatatgtaccatttcaCTTCAGCTTCCCGATATCCGACGGTAGTGTagggtggtggaatgcc   |
| PLCB1_2430 | cattccaccacctgactctCTTCAGCTTCCCGATATCCGACGGTAGTGTgtgacatgatgatctgta    |
| PLCB1_2432 | gccagtcaagtttgagtcattCTTCAGCTTCCCGATATCCGACGGTAGTGTtctcgggaaaataactga  |
| PLCB1_2433 | gattagacatttctctgtggcCTTCAGCTTCCCGATATCCGACGGTAGTGTtcttgttcccattact    |
| PLCB1_2435 | gggaaggtgagaataacaatCTTCAGCTTCCCGATATCCGACGGTAGTGTcgtcaaatcaaggatactc  |
| PLCB1_2434 | actgcagaatgaacacagctCTTCAGCTTCCCGATATCCGACGGTAGTGTttttgtttgttgttctta   |
| PLCB1_2436 | actatatgctcagctctctCTTCAGCTTCCCGATATCCGACGGTAGTGTggtagcttcttagtacta    |
| PLCB1_2437 | ggatgaatccacagctgttccCTTCAGCTTCCCGATATCCGACGGTAGTGTagaatggttttggacact  |
| PLCB1_2438 | catttactgaaggcatgtagCTTCAGCTTCCCGATATCCGACGGTAGTGTacaataaggcttgtgttt   |
| PLCB1_2439 | atcaaatgctgtcaggccCTTCAGCTTCCCGATATCCGACGGTAGTGTgactaagccacttcttatg    |
| PLCB1_2441 | aaccaacatatctactccagctCTTCAGCTTCCCGATATCCGACGGTAGTGTtataactcatatcaag   |
| PLCB1_2440 | aacatccaaggaatgctgCTTCAGCTTCCCGATATCCGACGGTAGTGTggattgattgattattga     |
| PLCB1_2443 | aaggacatgaagacacacctCTTCAGCTTCCCGATATCCGACGGTAGTGTaaggttctcagcacacta   |
| PLCB1_2442 | gtagtgtgctgagaaccttCTTCAGCTTCCCGATATCCGACGGTAGTGTggtgtgcttctaatgtcct   |
| PLCB1_2444 | aagactatgtgcagacacatCTTCAGCTTCCCGATATCCGACGGTAGTGTaactaacattggaaggaa   |
| PLCB1_2445 | gtagacaagacagcaggcagCTTCAGCTTCCCGATATCCGACGGTAGTGTggttcagtttcttctca    |
| PLCB1_2446 | aagaagaagtaagaagaagggtgCTTCAGCTTCCCGATATCCGACGGTAGTGTtccaggacctttagct  |
| PLCB1_2447 | atcttcagtgtaagaagcagcCTTCAGCTTCCCGATATCCGACGGTAGTGTcfaatgtgctattccttct |
| PLCB1_2448 | actacaacctgacaccaagCTTCAGCTTCCCGATATCCGACGGTAGTGTaggcaagaaagaataaaa    |
| PLCB1_2449 | gattccccatttctgctggaCTTCAGCTTCCCGATATCCGACGGTAGTGTcctcctgctggtgact     |
| PLCB1_2451 | cctgtaaacacaaacatattgCTTCAGCTTCCCGATATCCGACGGTAGTGTgggaaagggtgctt      |
| PLCB1_2450 | ccttcccccatggaattaCTTCAGCTTCCCGATATCCGACGGTAGTGTttgtttacaggaagaataa    |
| PLCB1_2452 | cacaagaaaaccactgacctCTTCAGCTTCCCGATATCCGACGGTAGTGTtcccttagcttcatattc   |
| PLCB1_2453 | catttctttagtgttcttctgCTTCAGCTTCCCGATATCCGACGGTAGTGTtcttcttggcggact     |

|              |                                                                         |
|--------------|-------------------------------------------------------------------------|
| PLCB1_2454   | ggacctgtaccatggcaagaaaaCTTCAGCTTCCCGATATCCGACGGTAGTGTggagagccctttggaa   |
| PLCB1_2455   | agcagcagctgcttaattcttCTTCAGCTTCCCGATATCCGACGGTAGTGTgagcaactctgtgtctt    |
| PLCB1_2456   | ccttcaagtctattaacttttggCTTCAGCTTCCCGATATCCGACGGTAGTGTaggaggttccagtgtgca |
| PLCB1_2457   | ctcaaaagaatctgtgagaagtCTTCAGCTTCCCGATATCCGACGGTAGTGTtgtttgaggaggtggga   |
| PLCB1_2458   | attgttctgacactctctctgCTTCAGCTTCCCGATATCCGACGGTAGTGTacaatggaagttaaagaga  |
| PLCB1_2459   | ccctctccaaacagttcatCTTCAGCTTCCCGATATCCGACGGTAGTGTctctttactctcattgtga    |
| PLCB1_2462   | catccagaattgacaaatggCTTCAGCTTCCCGATATCCGACGGTAGTGTatgttttcaaaggagagag   |
| PLCB1_2461   | cgctctctctttgcaaaacatCTTCAGCTTCCCGATATCCGACGGTAGTGTccatttgaattctgga     |
| PLCB1_2463   | cccaaggtaaacggaactgaCTTCAGCTTCCCGATATCCGACGGTAGTGTgcacttttaaatgtttagat  |
| PLCB1_2464   | ccttgtgttctctacagttCTTCAGCTTCCCGATATCCGACGGTAGTGTctgtgtacaaggtacttat    |
| PLCB1_2466   | ggaaaaaaaggaggctgtcattCTTCAGCTTCCCGATATCCGACGGTAGTGTctactctgccggaagg    |
| PLCB1_2465   | gtccttccggccaggttagaCTTCAGCTTCCCGATATCCGACGGTAGTGTatgacagctccctttttt    |
| PLCB1_2467   | acagcaatcacggttctgccCTTCAGCTTCCCGATATCCGACGGTAGTGTaagcatctccctctgat     |
| PLCB1_2468   | actgatcttcttctatggctCTTCAGCTTCCCGATATCCGACGGTAGTGTtcacagaggagatcaa      |
| PLCB1_2469   | aagatcactgccaggaccatcCTTCAGCTTCCCGATATCCGACGGTAGTGTgactccctccagtggga    |
| SYN1_2503    | gttgaaggcattgtcagagaCTTCAGCTTCCCGATATCCGACGGTAGTGTgattttggggttctcagag   |
| SYN1_2504    | cccagcttagccaggacgaCTTCAGCTTCCCGATATCCGACGGTAGTGTgtaactgtgttctctcc      |
| SYN1_2506    | caccccagctcaagtaaggggacCTTCAGCTTCCCGATATCCGACGGTAGTGTggcaccaccacgca     |
| SYN1_2505    | gtttctggccagctgtggttCTTCAGCTTCCCGATATCCGACGGTAGTGTctctactctggccagcgg    |
| SYN1_2507    | ggtagggcccagaggccttggcCTTCAGCTTCCCGATATCCGACGGTAGTGTcgctggccgaggctg     |
| SYN1_2508    | ggcgggcagcagcggcccttCTTCAGCTTCCCGATATCCGACGGTAGTGTccccggggcgctccagc     |
| SYN1_2509    | aggcgtggggcaggggctctCTTCAGCTTCCCGATATCCGACGGTAGTGTgagggcggggcgggc       |
| SYN1_2510    | ccaagtcccactcagcggcccCTTCAGCTTCCCGATATCCGACGGTAGTGTggcctccacagcggg      |
| SYN1_2511    | gcttaccctgtgtggggctctCTTCAGCTTCCCGATATCCGACGGTAGTGTcctggcgtggggcctg     |
| SYN1_2513    | gagaggctggcggctgcagtCTTCAGCTTCCCGATATCCGACGGTAGTGTtatttttaacctctctgc    |
| SYN1_2514    | gtcttcatctgtgtgtcaccacCTTCAGCTTCCCGATATCCGACGGTAGTGTaaggcactagctcagc    |
| SYN1_2515    | catctgtagctgtgtcaacCTTCAGCTTCCCGATATCCGACGGTAGTGTctgaagcagctgttac       |
| SYN1_2516    | gtatctccaagacaaagggtggCTTCAGCTTCCCGATATCCGACGGTAGTGTtctaccaccactcccc    |
| SYN1_2517    | gtgggtggacagctgctcagaCTTCAGCTTCCCGATATCCGACGGTAGTGTggagcaaatctcagct     |
| SYN1_2518    | gttcctgacactgactcctcCTTCAGCTTCCCGATATCCGACGGTAGTGTaagcctgtcagctctca     |
| SYN1_2519    | ggaagaccaatactggctctCTTCAGCTTCCCGATATCCGACGGTAGTGTaactacaaggcctacatgt   |
| SYN1_2520    | gatgtctggaagctagctgtCTTCAGCTTCCCGATATCCGACGGTAGTGTggccttgtctctcca       |
| SYN1_2521    | caagtgctgtgactgaccaCTTCAGCTTCCCGATATCCGACGGTAGTGTctgtgtgtatgtatacat     |
| SYN1_2523    | gctggcgtgtcataggtagatCTTCAGCTTCCCGATATCCGACGGTAGTGTcctggagggtacccttt    |
| SYN1_2522    | cagaaagggtgacctcaggCTTCAGCTTCCCGATATCCGACGGTAGTGTatctacctatgcacagccc    |
| SYN1_2525    | ggggaaaatagatggggcaggaCTTCAGCTTCCCGATATCCGACGGTAGTGTactcactgaccagctct   |
| SYN1_2524    | gctgggtcagtgagctctcCTTCAGCTTCCCGATATCCGACGGTAGTGTcccactctattttcccaaa    |
| SYN1_2526    | catactgcagcccaatgacaaaCTTCAGCTTCCCGATATCCGACGGTAGTGTgggttcaagctccaca    |
| SYN1_2527    | cccaggttaactccttctcattCTTCAGCTTCCCGATATCCGACGGTAGTGTcaacactctaccctg     |
| SYN1_2529    | gaagggtacctgtgtttatCTTCAGCTTCCCGATATCCGACGGTAGTGTgaatcaccagttttttc      |
| SYN1_2528    | aaaactgtgtattcacctacatCTTCAGCTTCCCGATATCCGACGGTAGTGTccaaggtaccctcttat   |
| SYN1_2531    | gggacattggactgggggtcCTTCAGCTTCCCGATATCCGACGGTAGTGTggcctgtgtttgtcttc     |
| SYN1_2530    | agacaaaacacaggccctgacCTTCAGCTTCCCGATATCCGACGGTAGTGTcaggtccaaatgtccaa    |
| SYN1_2532    | cgcccgctgtctgctgacCTTCAGCTTCCCGATATCCGACGGTAGTGTgagacgtccggcagtg        |
| SYN1_2533    | cagcgagcaggtggcgggcCTTCAGCTTCCCGATATCCGACGGTAGTGTgagaggtcctccggggtc     |
| SYN1_2534    | gacgctgcagctgtctatgaccCTTCAGCTTCCCGATATCCGACGGTAGTGTggaccggggtaggg      |
| SYN1_2535    | gcagccgccccaccggcCTTCAGCTTCCCGATATCCGACGGTAGTGTcggctctggccagaccacc      |
| ARHGEF9_2536 | ccaggtactggcgtgttctCTTCAGCTTCCCGATATCCGACGGTAGTGTaaaataatctgtcctcctg    |
| ARHGEF9_2537 | catcgtcagctgcaggtctCTTCAGCTTCCCGATATCCGACGGTAGTGTgtttacataactataccct    |
| ARHGEF9_2539 | actcagctctgtgaaagactaCTTCAGCTTCCCGATATCCGACGGTAGTGTaagggtgtgtttctca     |
| ARHGEF9_2538 | attttttaatgagaacacacacCTTCAGCTTCCCGATATCCGACGGTAGTGTtccatagctttcaca     |
| ARHGEF9_2540 | gtctccttgtgtgaagcttaaCTTCAGCTTCCCGATATCCGACGGTAGTGTcttcttctactctcagg    |
| ARHGEF9_2541 | agaagctggaggaaaaaatagCTTCAGCTTCCCGATATCCGACGGTAGTGTcgactgacatggataaa    |
| ARHGEF9_2542 | gtgcacggcagtagtactagaaCTTCAGCTTCCCGATATCCGACGGTAGTGTatgaagctcatctctctg  |
| ARHGEF9_2543 | gagctcgttctagatgtctcCTTCAGCTTCCCGATATCCGACGGTAGTGTagggaagaaggggcag      |
| ARHGEF9_2544 | gagctgatctacactggggagatCTTCAGCTTCCCGATATCCGACGGTAGTGTcctctctatcccagt    |
| ARHGEF9_2545 | catttctcatgacagccaagCTTCAGCTTCCCGATATCCGACGGTAGTGTcaagctattcagatttccc   |
| ARHGEF9_2546 | gactcagcagatcaacgaacgCTTCAGCTTCCCGATATCCGACGGTAGTGTaggagagtggtgttaaga   |
| ARHGEF9_2547 | atcatctgctcaagaggcgaCTTCAGCTTCCCGATATCCGACGGTAGTGTattcactctgactcctc     |
| ARHGEF9_2548 | ccttttgactccagtgcagaaCTTCAGCTTCCCGATATCCGACGGTAGTGTctgagtattgtaacaacc   |
| ARHGEF9_2549 | gacagatcatattcttagcgaaCTTCAGCTTCCCGATATCCGACGGTAGTGTcatgcaagcatccagg    |
| ARHGEF9_2550 | aagccatctgaaatctgtagCTTCAGCTTCCCGATATCCGACGGTAGTGTtccattgttcttaacac     |
| ARHGEF9_2551 | gtgagagacctggagaaacagCTTCAGCTTCCCGATATCCGACGGTAGTGTgacctaggcttttctttg   |
| ARHGEF9_2552 | agaggcagctgaattgggtCTTCAGCTTCCCGATATCCGACGGTAGTGTctccacatgaaccaccatg    |
| ARHGEF9_2553 | ggggcgccactacagaaccCTTCAGCTTCCCGATATCCGACGGTAGTGTgaaggaagctaaccttat     |



|               |                                                                         |
|---------------|-------------------------------------------------------------------------|
| ARHGEF9_2554  | ctttaaataccaactcccgggtCTTCAGCTTCCCGATATCCGACGGTAGTGTaataggagaggagagtgga |
| ARHGEF9_2555  | gacgtcatcaaaagtctggatgcCTTCAGCTTCCCGATATCCGACGGTAGTGTgtagctgtggactga    |
| ARHGEF9_2557  | atctttgtctgtcttctctCTTCAGCTTCCCGATATCCGACGGTAGTGTaaaaaatcacagacagag     |
| ARHGEF9_2556  | cctgtctctgtctgtatttttCTTCAGCTTCCCGATATCCGACGGTAGTGTaaagacaagacagacaaa   |
| ARHGEF9_2559  | gcatgtaaccttggcttcccttCTTCAGCTTCCCGATATCCGACGGTAGTGTggctctcgtcttctca    |
| ARHGEF9_2558  | gaagcaagcagagagcccagcCTTCAGCTTCCCGATATCCGACGGTAGTGTgaagccaaggttacatgca  |
| MECP2_2580    | ccctcggtgttgtacttttCTTCAGCTTCCCGATATCCGACGGTAGTGTtggtttggcttggcaatcc    |
| MECP2_2581    | agggagagcgaagacattgtCTTCAGCTTCCCGATATCCGACGGTAGTGTgctgcaagaggagagaag    |
| MECP2_2582    | gctcaggtggaggtgggggcaCTTCAGCTTCCCGATATCCGACGGTAGTGTagtcttagctgctccttg   |
| MECP2_2583    | ccccctgagcccaggacttgaCTTCAGCTTCCCGATATCCGACGGTAGTGTtctctcaccaccaagaa    |
| MECP2_2584    | gctcttacaggtctcagctcttCTTCAGCTTCCCGATATCCGACGGTAGTGTgggagcagtgccacgg    |
| MECP2_2585    | gcggaaaagcaaggagagcagCTTCAGCTTCCCGATATCCGACGGTAGTGTgactccccatcaagaagc   |
| MECP2_2587    | gccaaaaaagaaagcctggaaggCTTCAGCTTCCCGATATCCGACGGTAGTGTcaccacatcccccaggt  |
| MECP2_2586    | cccgtttcttgggaatggcctgaCTTCAGCTTCCCGATATCCGACGGTAGTGTcctctcccgggtcttg   |
| MECP2_2588    | acttttctcaggaccttttctcCTTCAGCTTCCCGATATCCGACGGTAGTGTgctcagcttttctgct    |
| MECP2_2589    | gggaagctccttgaagatgcCTTCAGCTTCCCGATATCCGACGGTAGTGTgaagccaaatctccaa      |
| MECP2_2590    | atcattagggtccagggatgtctCTTCAGCTTCCCGATATCCGACGGTAGTGTggtgcccctctctt     |
| MECP2_2591    | gacttcacgtaactgggagagCTTCAGCTTCCCGATATCCGACGGTAGTGTgactcttaattgttctt    |
| MECP2_2592    | ggtgggtcatcatacatgggtcCTTCAGCTTCCCGATATCCGACGGTAGTGTtctctgcccctct       |
| MECP2_2593    | ggacacggaagctaaagcaaaCTTCAGCTTCCCGATATCCGACGGTAGTGTcaagcagagacatcagaa   |
| MECP2_2594    | cctcttctcttcttcttcttCTTCAGCTTCCCGATATCCGACGGTAGTGTctgttggggaggca        |
| MECP2_2595    | catgagcccgtgcagcctcCTTCAGCTTCCCGATATCCGACGGTAGTGTgtgatacttacatctgt      |
| MECP2_2597    | gtatatgtctggttggccaCTTCAGCTTCCCGATATCCGACGGTAGTGTaccagttctcttggatg      |
| MECP2_2596    | catcaagcaggaactgggtgaCTTCAGCTTCCCGATATCCGACGGTAGTGTgcaaacacagacatatac   |
| MECP2_2599    | gggaccgctggccgcccggcCTTCAGCTTCCCGATATCCGACGGTAGTGTcgtggcggcgcgcccgc     |
| MECP2_2598    | cgcgccgcccgcagcgggCTTCAGCTTCCCGATATCCGACGGTAGTGTggcccacggcggctcca       |
| DLGAP3_MIP_1  | gcccgttgcgcttctctcCTTCAGCTTCCCGATATCCGACGGTAGTGTggcccggcggctggcg        |
| DLGAP3_MIP_2  | cctggcggcgaagcgcgcttCTTCAGCTTCCCGATATCCGACGGTAGTGTgccccagaggagaga       |
| DLGAP3_MIP_3  | cgaacgcgatggcgcctcgaactCTTCAGCTTCCCGATATCCGACGGTAGTGTatgctcagggagcctc   |
| DLGAP3_MIP_4  | gtaggagtcccagaaccctCTTCAGCTTCCCGATATCCGACGGTAGTGTgaatttccagagctgctgc    |
| DLGAP3_MIP_5  | aggatgtgacctcaagttctctCTTCAGCTTCCCGATATCCGACGGTAGTGTgctgggctcagacctc    |
| DLGAP3_MIP_6  | actagaaagcagaagaaattcCTTCAGCTTCCCGATATCCGACGGTAGTGTcatatgtatctgtagga    |
| DLGAP3_MIP_7  | gtgctgtgggcagcacacaCTTCAGCTTCCCGATATCCGACGGTAGTGTatggatacacagtccaag     |
| DLGAP3_MIP_8  | catcttgatgaaccactcgcctcCTTCAGCTTCCCGATATCCGACGGTAGTGTgaggccatggtcccca   |
| DLGAP3_MIP_9  | gcagatggagcgtgaggcgaCTTCAGCTTCCCGATATCCGACGGTAGTGTcgtactctgtagagac      |
| DLGAP3_MIP_10 | ggtagggccactggccctcctCTTCAGCTTCCCGATATCCGACGGTAGTGTggggagctcagtaaccg    |
| DLGAP3_MIP_11 | cgagggtaccactcctcCTTCAGCTTCCCGATATCCGACGGTAGTGTggccacagaagacaagggcc     |
| DLGAP3_MIP_12 | cctggggagaggggtggctctCTTCAGCTTCCCGATATCCGACGGTAGTGTtctggaaggagctca      |
| DLGAP3_MIP_13 | gagcaagttcaagcctcctcCTTCAGCTTCCCGATATCCGACGGTAGTGTaagtgcagctaaatgtcc    |
| DLGAP3_MIP_14 | atctgagatcgtctccactggCTTCAGCTTCCCGATATCCGACGGTAGTGTctatgcagccctctctc    |
| DLGAP3_MIP_15 | ccggaggaggttccactctattggCTTCAGCTTCCCGATATCCGACGGTAGTGTcttggggcagccat    |
| DLGAP3_MIP_16 | gtcttgatgatgagtgtgggggcCTTCAGCTTCCCGATATCCGACGGTAGTGTcaccacgccccgacc    |
| DLGAP3_MIP_17 | ccattggggtgcaggtatggaacCTTCAGCTTCCCGATATCCGACGGTAGTGTgctgcgcacactggag   |
| DLGAP3_MIP_18 | gtctggcgggtgatggagatgCTTCAGCTTCCCGATATCCGACGGTAGTGTcccggggcggcaccggcg   |
| DLGAP3_MIP_19 | gcaccgactccgcagcagCTTCAGCTTCCCGATATCCGACGGTAGTGTaggcagggccgagcctca      |
| DLGAP3_MIP_20 | gtccgcatgcccgaacagccCTTCAGCTTCCCGATATCCGACGGTAGTGTggccggccagggcgagga    |
| DLGAP3_MIP_21 | ccatcagggcggctgctctcCTTCAGCTTCCCGATATCCGACGGTAGTGTgctcagcagatgattgaa    |
| DLGAP3_MIP_22 | aagacctctatctcagaggCTTCAGCTTCCCGATATCCGACGGTAGTGTacaccgaccgcacac        |
| DLGAP3_MIP_23 | aacagtggactgctagaggtgCTTCAGCTTCCCGATATCCGACGGTAGTGTtctcagggcactatggg    |
| DLGAP3_MIP_24 | cccagatgctgaggaaagaCTTCAGCTTCCCGATATCCGACGGTAGTGTtctcagctcactggt        |
| DLGAP3_MIP_25 | actgcttgggagatgctctCTTCAGCTTCCCGATATCCGACGGTAGTGTccactctacacatctcc      |
| DLGAP3_MIP_26 | gatcaagtaaggacagggaggcCTTCAGCTTCCCGATATCCGACGGTAGTGTgagcggcagctacatca   |
| DLGAP3_MIP_27 | gtctctcagacatgacctagtCTTCAGCTTCCCGATATCCGACGGTAGTGTctctctcatccccatg     |
| DLGAP3_MIP_28 | ggtatccatcccggccctggCTTCAGCTTCCCGATATCCGACGGTAGTGTagtggacaagactggtgaag  |
| DLGAP3_MIP_29 | ccaagccaaagcaggacttaCTTCAGCTTCCCGATATCCGACGGTAGTGTgactcggcatgctcatg     |
| DLGAP3_MIP_30 | aaggaccaccaggtccccagCTTCAGCTTCCCGATATCCGACGGTAGTGTactcgttggaccagctg     |
| DLGAP3_MIP_31 | cctggaggtccagatgggtctCTTCAGCTTCCCGATATCCGACGGTAGTGTggaccgaaggagatg      |
| DLGAP3_MIP_32 | ggtggtgatggaggtgctggCTTCAGCTTCCCGATATCCGACGGTAGTGTacttcaagttgcatcg      |
| DLGAP3_MIP_33 | accagtcccggcagcgaagaCTTCAGCTTCCCGATATCCGACGGTAGTGTggggaaagcggactataat   |
| DLGAP3_MIP_34 | ggcagtgcccctcctggcctggCTTCAGCTTCCCGATATCCGACGGTAGTGTcctcagccttgggcc     |
| DLGAP3_MIP_35 | gcatccggcactggtcattCTTCAGCTTCCCGATATCCGACGGTAGTGTgaaaagcagttgccagtt     |
| DLGAP3_MIP_36 | caggttacatcctgggaaggCTTCAGCTTCCCGATATCCGACGGTAGTGTgtgtggaagcactctgt     |
| DLGAP3_MIP_37 | gacacctgtaagactgtgctgCTTCAGCTTCCCGATATCCGACGGTAGTGTcatttctctgaaggcc     |
| DLGAP3_MIP_38 | ggccctggcagcaggcccCTTCAGCTTCCCGATATCCGACGGTAGTGTtccctcagggcctaccgac     |
| DLGAP3_MIP_39 | aggccttcccaccagcccCTTCAGCTTCCCGATATCCGACGGTAGTGTgagccttctgtaggacctg     |

|               |                                                                         |
|---------------|-------------------------------------------------------------------------|
| DLGAP3_MIP_40 | catcttttattaggcatccttgtaCTTCAGCTTCCCGATATCCGACGGTAGTGTggctccatggtaacc   |
| SV2A_MIP_1    | gaggatgggtgcagccttggcttCCTCAGCTTCCCGATATCCGACGGTAGTGTggagtgttggcttcacag |
| SV2A_MIP_2    | cccttgccctggcagctctctCCTCAGCTTCCCGATATCCGACGGTAGTGTctctgagcaggaccaca    |
| SV2A_MIP_3    | caagagggagagagaaggttgCCTCAGCTTCCCGATATCCGACGGTAGTGTggcattcaggaagccaaaa  |
| SV2A_MIP_4    | ggcggactcactgttcccaaaCCTCAGCTTCCCGATATCCGACGGTAGTGTaatccactgcctgcctc    |
| SV2A_MIP_5    | ggacgtgtgactgttgaactctaCCTCAGCTTCCCGATATCCGACGGTAGTGTgctccagctggctcca   |
| SV2A_MIP_6    | gcccaggatgagactgttccCCTCAGCTTCCCGATATCCGACGGTAGTGTcaggaagaagcaggagaca   |
| SV2A_MIP_7    | catgtaggcaccttgcctcCCTCAGCTTCCCGATATCCGACGGTAGTGTtactatcagatctgactca    |
| SV2A_MIP_8    | gggacactggcagtgcttccCCTCAGCTTCCCGATATCCGACGGTAGTGTgacctgttcgagtaagaatt  |
| SV2A_MIP_9    | gtagtagggagggtctcaaaCCTCAGCTTCCCGATATCCGACGGTAGTGTcagacggctgttcc        |
| SV2A_MIP_10   | gaatcctcaaaggacactgacCCTCAGCTTCCCGATATCCGACGGTAGTGTaacctttgtctgacacc    |
| SV2A_MIP_11   | gttattttgaggatgtcacatccCCTCAGCTTCCCGATATCCGACGGTAGTGTtctcctaaagagtgagt  |
| SV2A_MIP_12   | gtccactgcctggagatggcCCTCAGCTTCCCGATATCCGACGGTAGTGTgtgaagttaaaagctccca   |
| SV2A_MIP_13   | cgatcccgcaccaaggtgtCCTCAGCTTCCCGATATCCGACGGTAGTGTctctgctgattctaattct    |
| SV2A_MIP_14   | ggaccagacaaagtccagactCCTCAGCTTCCCGATATCCGACGGTAGTGTcaccacacatcaccagc    |
| SV2A_MIP_15   | gtggctgggtgatgtgtggCCTCAGCTTCCCGATATCCGACGGTAGTGTcaaggtctgactttgtctg    |
| SV2A_MIP_16   | gttacctgggtcaagagaaggCCTCAGCTTCCCGATATCCGACGGTAGTGTtctaccacccctccac     |
| SV2A_MIP_17   | gacgattcatcaggaggatgaaCCTCAGCTTCCCGATATCCGACGGTAGTGTgggtatcatatccacct   |
| SV2A_MIP_18   | gacacaatccccacatccaagtCCTCAGCTTCCCGATATCCGACGGTAGTGTggctgagctggaggg     |
| SV2A_MIP_19   | cctccgactcagactccacCCTCAGCTTCCCGATATCCGACGGTAGTGTggatgtgggattgttct      |
| SV2A_MIP_20   | gcagaaccatctgaaaactccaCCTCAGCTTCCCGATATCCGACGGTAGTGTatgcagctcagccccat   |
| SV2A_MIP_21   | agctggagggtcttctctcCCTCAGCTTCCCGATATCCGACGGTAGTGTtattctcctctccctct      |
| SV2A_MIP_22   | gggcccagaactcggagaatagCCTCAGCTTCCCGATATCCGACGGTAGTGTactcgggtggatttcc    |
| SV2A_MIP_23   | ctggctctgatgtttggatgaCCTCAGCTTCCCGATATCCGACGGTAGTGTgatcaggatcatggcca    |
| SV2A_MIP_24   | gttgactgagagcagatgagcCCTCAGCTTCCCGATATCCGACGGTAGTGTcagtaccaggcacagt     |
| SV2A_MIP_25   | cgcttctgccttctctactCCTCAGCTTCCCGATATCCGACGGTAGTGTgctgtttctcctctcc       |
| SV2A_MIP_26   | cacaaaatacagtgccactggaCCTCAGCTTCCCGATATCCGACGGTAGTGTggagccccatgtct      |
| SV2A_MIP_27   | gacggtgtggaggtcttgggtCCTCAGCTTCCCGATATCCGACGGTAGTGTggcttctcgttctcccg    |
| SV2A_MIP_28   | gccccgggaatgcctcCCTCAGCTTCCCGATATCCGACGGTAGTGTgttcttctcgttctcccg        |
| SV2A_MIP_29   | agtctggggcacaaggcagCCTCAGCTTCCCGATATCCGACGGTAGTGTccagatggttattaccga     |
| SV2A_MIP_30   | atattctctgactctgtcCCTCAGCTTCCCGATATCCGACGGTAGTGTtcatgtagcatcactggatg    |
| SV2A_MIP_31   | gaagatcgtactccgcttCCTCAGCTTCCCGATATCCGACGGTAGTGTcatcatggaagaggcttc      |
| SV2A_MIP_32   | gctcaaggactgtagatcaCCTCAGCTTCCCGATATCCGACGGTAGTGTttttgacttcttagcaa      |
| SYT2_MIP_1    | gaccagtccgcagctctgtCCTCAGCTTCCCGATATCCGACGGTAGTGTgtgtccgtaaaaggttgg     |
| SYT2_MIP_2    | caagcctgaggaggaggtggaCCTCAGCTTCCCGATATCCGACGGTAGTGTtatgacaagctggcaaga   |
| SYT2_MIP_3    | aatttatctccatcaacctcaCCTCAGCTTCCCGATATCCGACGGTAGTGTcagaatcttgcctatg     |
| SYT2_MIP_4    | gttgttcttcttctgagccCCTCAGCTTCCCGATATCCGACGGTAGTGTatacatgttgcctcccc      |
| SYT2_MIP_5    | gtgaagaagaagaccctgaaccCCTCAGCTTCCCGATATCCGACGGTAGTGTgttaccattcggcaggaa  |
| SYT2_MIP_6    | cagatgtgcccagcttctCCTCAGCTTCCCGATATCCGACGGTAGTGTggtgccaccactggcagcc     |
| SYT2_MIP_7    | gccgggaagctactgtctCCTCAGCTTCCCGATATCCGACGGTAGTGTtcaatgttggcaagaagag     |
| SYT2_MIP_8    | cggtcaaagtcagatggccatCCTCAGCTTCCCGATATCCGACGGTAGTGTggctcatctctgctct     |
| SYT2_MIP_9    | ccaaacatgacatcattggagagCCTCAGCTTCCCGATATCCGACGGTAGTGTccatagaccctgga     |
| SYT2_MIP_10   | gacataagggtctgaggtgctcCCTCAGCTTCCCGATATCCGACGGTAGTGTgggagctggagtcacc    |
| SYT2_MIP_11   | aggcttctctctcctgacaagCCTCAGCTTCCCGATATCCGACGGTAGTGTgtgtattggagcagt      |
| SYT2_MIP_12   | gctcttctctctcccttCCTCAGCTTCCCGATATCCGACGGTAGTGTgttctatccccctccac        |
| SYT2_MIP_13   | gcagtttccctggactatgatCCTCAGCTTCCCGATATCCGACGGTAGTGTgttctccccctttaa      |
| SYT2_MIP_14   | gttcttcttctctgagcagcCCTCAGCTTCCCGATATCCGACGGTAGTGTccttccagcatcaggaa     |
| SYT2_MIP_15   | gagaaggcacaaggatgaaCCTCAGCTTCCCGATATCCGACGGTAGTGTatcttctctgtgtggc       |
| SYT2_MIP_16   | actctcagtgagttgtccagcCCTCAGCTTCCCGATATCCGACGGTAGTGTtctccagactctagcct    |
| SYT2_MIP_17   | caggaggacatgttgcacaactCCTCAGCTTCCCGATATCCGACGGTAGTGTtctctccaccatgag     |
| SYT2_MIP_18   | agaagctcttatagatcaagaCCTCAGCTTCCCGATATCCGACGGTAGTGTggctctgttctctt       |
| MAPK8_MIP_1   | gctcaggagctcaaggaataCCTCAGCTTCCCGATATCCGACGGTAGTGTtttggatgaagccattaat   |
| MAPK8_MIP_2   | atatcgtttcaggactgtgaaCCTCAGCTTCCCGATATCCGACGGTAGTGTaaatattgccaaagatc    |
| MAPK8_MIP_3   | gcctacagagagctagtctCCTCAGCTTCCCGATATCCGACGGTAGTGTattttgctgaagttttt      |
| MAPK8_MIP_4   | cgcttggcatgagctgattCCTCAGCTTCCCGATATCCGACGGTAGTGTcccaaatattgatcttga     |
| MAPK8_MIP_5   | aagtcgagagacagaaaaatagCCTCAGCTTCCCGATATCCGACGGTAGTGTgtccagcagcaatcta    |
| MAPK8_MIP_6   | ctagatcatgaagaatgtctacCCTCAGCTTCCCGATATCCGACGGTAGTGTttttgtaagttagta     |
| MAPK8_MIP_7   | ccatctgaatcacttggcaaaCCTCAGCTTCCCGATATCCGACGGTAGTGTcctcaatgagaaaacaaga  |
| MAPK8_MIP_8   | atgacgccttatgtagctCCTCAGCTTCCCGATATCCGACGGTAGTGTtatcatggcagctatttt      |
| MAPK8_MIP_9   | gttctctcagctctggccagCCTCAGCTTCCCGATATCCGACGGTAGTGTgaaaaaaagctaaatcaga   |
| MAPK8_MIP_10  | gcgatgaactcttatgttctCCTCAGCTTCCCGATATCCGACGGTAGTGTctttgtgctgcaaca       |
| MAPK8_MIP_11  | gtttgcagcaaaaagaaggaCCTCAGCTTCCCGATATCCGACGGTAGTGTcataaagaagttcatgcc    |
| MAPK8_MIP_12  | gtagtttcaaaagctaaaatCCTCAGCTTCCCGATATCCGACGGTAGTGTatctttatgtaagtcat     |
| MAPK8_MIP_13  | caatgacattaacataaagattCCTCAGCTTCCCGATATCCGACGGTAGTGTtttgaccttagaaact    |
| MAPK8_MIP_14  | atatgctggatagcttgaCCTCAGCTTCCCGATATCCGACGGTAGTGTattttcttagctactga       |

|               |                                                                        |
|---------------|------------------------------------------------------------------------|
| MAPK8_MIP_15  | caacgtaagtcttactgttggCTTCAGCTTCCCGATATCCGACGGTAGTGTaccccaatgggattaaa   |
| MAPK8_MIP_16  | atccttctgaagcagaagctCTTCAGCTTCCCGATATCCGACGGTAGTGTgtacattaacaccattatg  |
| MAPK8_MIP_17  | ggagagcttcatctacagagaCTTCAGCTTCCCGATATCCGACGGTAGTGTaataaaaaggtctctcca  |
| MAPK8_MIP_18  | cttctggttttatagtgaCTTCAGCTTCCCGATATCCGACGGTAGTGTggttattattgctctgtg     |
| MAPK8_MIP_19  | aggcaataataaccaagtcagtCTTCAGCTTCCCGATATCCGACGGTAGTGTaataaaaccagaagctcc |
| MAPK8_MIP_20  | ccttccttaggttggttacaCTTCAGCTTCCCGATATCCGACGGTAGTGTacatgctgttgagatt     |
| MAPK8_MIP_21  | gccccgtataactcattctCTTCAGCTTCCCGATATCCGACGGTAGTGTaagcctggaataataatga   |
| MAPK8_MIP_22  | cagtctagaagcagcagctgCTTCAGCTTCCCGATATCCGACGGTAGTGTgatttctgtttgtttctc   |
| MAPK8_MIP_23  | gtctgtatcagaggccaaagtCTTCAGCTTCCCGATATCCGACGGTAGTGTaataagaccactgaattgt |
| SV2B_MIP_1    | agaagatgcacagatgatgtcCTTCAGCTTCCCGATATCCGACGGTAGTGTcgaggatagactcaag    |
| SV2B_MIP_2    | ggtaatagccatcactgggagcaCTTCAGCTTCCCGATATCCGACGGTAGTGTcctgcttggccttgaca |
| SV2B_MIP_3    | cgagaccatcatgatgagtgCTTCAGCTTCCCGATATCCGACGGTAGTGTgtatccctcaccagatg    |
| SV2B_MIP_4    | catcttccagctctcagccaCTTCAGCTTCCCGATATCCGACGGTAGTGTaaaactcaccagaact     |
| SV2B_MIP_5    | aagggaaggagaagtaaaattatCTTCAGCTTCCCGATATCCGACGGTAGTGTgatggcagtggggtg   |
| SV2B_MIP_6    | cagcatgtctctggcctcaCTTCAGCTTCCCGATATCCGACGGTAGTGTaatctttgtctttctctc    |
| SV2B_MIP_7    | gcttcttcccagcttatcagcCTTCAGCTTCCCGATATCCGACGGTAGTGTgctccacctccctaaga   |
| SV2B_MIP_8    | catcttctggatgactggggCTTCAGCTTCCCGATATCCGACGGTAGTGTtagtgtatgacttattctt  |
| SV2B_MIP_9    | cccagacaagaattcagaaaaatCTTCAGCTTCCCGATATCCGACGGTAGTGTggccccctaggctgtt  |
| SV2B_MIP_10   | cagagagcccaaggttctgcCTTCAGCTTCCCGATATCCGACGGTAGTGTtttgactcagctcttt     |
| SV2B_MIP_11   | catgaacttcagggccacatgCTTCAGCTTCCCGATATCCGACGGTAGTGTaagcagcagaggtgtg    |
| SV2B_MIP_12   | ccaataagaaggggttctccCTTCAGCTTCCCGATATCCGACGGTAGTGTgtcttcttggtttccac    |
| SV2B_MIP_13   | gtgaaaccaaggaagacacagCTTCAGCTTCCCGATATCCGACGGTAGTGTgaaacccctcttattgg   |
| SV2B_MIP_14   | caagaccatttcaagcaggtCTTCAGCTTCCCGATATCCGACGGTAGTGTgggggttcaaatctctat   |
| SV2B_MIP_15   | accaggttctgttgaacttggCTTCAGCTTCCCGATATCCGACGGTAGTGTggatgttcaggagctgc   |
| SV2B_MIP_16   | atttctgaattcctgtgctcCTTCAGCTTCCCGATATCCGACGGTAGTGTtctctctggtatgggtg    |
| SV2B_MIP_17   | caaccataccagagaaggattCTTCAGCTTCCCGATATCCGACGGTAGTGTcagaggaattcagaat    |
| SV2B_MIP_18   | atcaactcagatggaaaatcaCTTCAGCTTCCCGATATCCGACGGTAGTGTtctccttctccactc     |
| SV2B_MIP_19   | cttctatttagactgtattctCTTCAGCTTCCCGATATCCGACGGTAGTGTgtcacctctggtgag     |
| SV2B_MIP_20   | gaaatcaaccttttacaacacCTTCAGCTTCCCGATATCCGACGGTAGTGTgggtcaacctcttcca    |
| SV2B_MIP_21   | caaatagcactcgtcaagaCTTCAGCTTCCCGATATCCGACGGTAGTGTtcttggacaacacaagttg   |
| SV2B_MIP_22   | atttacctcgtcagcttctggCTTCAGCTTCCCGATATCCGACGGTAGTGTaacgaaggttcttctt    |
| SV2B_MIP_23   | aggaagtattatcttctccaCTTCAGCTTCCCGATATCCGACGGTAGTGTggaaccaggaatgacc     |
| SV2B_MIP_24   | cctgttctgtggacaagcattCTTCAGCTTCCCGATATCCGACGGTAGTGTcaagacacaggcctcatg  |
| SV2B_MIP_25   | attgagactcactgttccaCTTCAGCTTCCCGATATCCGACGGTAGTGTcaaaccaagtcctcaggaa   |
| SV2B_MIP_26   | gctgctcttctctggttggCTTCAGCTTCCCGATATCCGACGGTAGTGTtatttccattcctcttta    |
| SV2B_MIP_27   | gaagatggggaccactttggttCTTCAGCTTCCCGATATCCGACGGTAGTGTtttcagtgctctggaca  |
| DLGAP1_MIP_1  | ggcgttggggcctctggcCTTCAGCTTCCCGATATCCGACGGTAGTGTtcttggcggcgccgggg      |
| DLGAP1_MIP_2  | atggcggccaagcgcgcgctCTTCAGCTTCCCGATATCCGACGGTAGTGTaaccttctgctttgatca   |
| DLGAP1_MIP_3  | gttctgactgcacactgcatatCTTCAGCTTCCCGATATCCGACGGTAGTGTgaggagggcccttctc   |
| DLGAP1_MIP_4  | ccccaaaccgccaatctcCTTCAGCTTCCCGATATCCGACGGTAGTGTaatgaaccatacaaatcta    |
| DLGAP1_MIP_5  | catgctgcagttgtccatagCTTCAGCTTCCCGATATCCGACGGTAGTGTtatttgaatgcttctttg   |
| DLGAP1_MIP_6  | cctagaactggaagagcaacaCTTCAGCTTCCCGATATCCGACGGTAGTGTcatggcactagcagg     |
| DLGAP1_MIP_7  | cagtgggcagtgcccaactcCTTCAGCTTCCCGATATCCGACGGTAGTGTgtgtccattttccta      |
| DLGAP1_MIP_8  | ccaccctcatgctgtctcCTTCAGCTTCCCGATATCCGACGGTAGTGTcagagaagaaaacaacagg    |
| DLGAP1_MIP_9  | ggaagaacgggaaaaaacctCTTCAGCTTCCCGATATCCGACGGTAGTGTgattgactctactgaag    |
| DLGAP1_MIP_10 | gtttctgagccctgaatgctgCTTCAGCTTCCCGATATCCGACGGTAGTGTggcacactgacctttgca  |
| DLGAP1_MIP_11 | cctgtgcccgatgatgacCTTCAGCTTCCCGATATCCGACGGTAGTGTtccatgataatctggaat     |
| DLGAP1_MIP_12 | cttgggagatagaaaaaagaaatCTTCAGCTTCCCGATATCCGACGGTAGTGTgtctggccatggggcc  |
| DLGAP1_MIP_13 | ccacctggagaaatcatcaaaCTTCAGCTTCCCGATATCCGACGGTAGTGTtcaaaaacatcaagacaaa |
| DLGAP1_MIP_14 | caaaacaggggagaataaagcCTTCAGCTTCCCGATATCCGACGGTAGTGTcaaaaacatccagtcata  |
| DLGAP1_MIP_15 | gcagtgatttgccatgtgCTTCAGCTTCCCGATATCCGACGGTAGTGTtctctatttcaaaggataga   |
| DLGAP1_MIP_16 | gtcaccaccagactaccatagCTTCAGCTTCCCGATATCCGACGGTAGTGTcagccagctctgactcag  |
| DLGAP1_MIP_17 | gtttctgttagtctctgggtggCTTCAGCTTCCCGATATCCGACGGTAGTGTatctgtccaggctctg   |
| DLGAP1_MIP_18 | cacagcccagatgacacagaCTTCAGCTTCCCGATATCCGACGGTAGTGTaaatataaacccacgcaga  |
| DLGAP1_MIP_19 | ggagcagcttttcaatggcccCTTCAGCTTCCCGATATCCGACGGTAGTGTccatagccagcagagg    |
| DLGAP1_MIP_20 | acgagtgctgtccttggagctCTTCAGCTTCCCGATATCCGACGGTAGTGTgtgtgctgagctgttct   |
| DLGAP1_MIP_21 | cctctcaagcatctgcaactcCTTCAGCTTCCCGATATCCGACGGTAGTGTggcctcgactccagc     |
| DLGAP1_MIP_22 | ggttgatggagacttcaactcCTTCAGCTTCCCGATATCCGACGGTAGTGTcctgaccaccctgctcc   |
| DLGAP1_MIP_23 | gagcctggacagcctggaccCTTCAGCTTCCCGATATCCGACGGTAGTGTcctgcaatttgggaatgga  |
| DLGAP1_MIP_24 | agtctcaactgtctctccccCTTCAGCTTCCCGATATCCGACGGTAGTGTgactatcgaaagtcagg    |
| DLGAP1_MIP_25 | agtctcaagccttctcaaaaCTTCAGCTTCCCGATATCCGACGGTAGTGTaataggttccacaagatga  |
| DLGAP1_MIP_26 | gatttaacattctatttttCTTCAGCTTCCCGATATCCGACGGTAGTGTatggaatttcatcatctt    |
| DLGAP1_MIP_27 | gatttaacattctatttttCTTCAGCTTCCCGATATCCGACGGTAGTGTatggaatttcatcatctt    |
| DLGAP1_MIP_28 | cttctctatgattgccgaCTTCAGCTTCCCGATATCCGACGGTAGTGTcctttccatagcccaga      |
| DLGAP1_MIP_29 | gcaattctgggctatggaaggCTTCAGCTTCCCGATATCCGACGGTAGTGTcggcaatcatagagag    |

|               |                                                                         |
|---------------|-------------------------------------------------------------------------|
| DLGAP1_MIP_30 | ccatggcctggctcatgttcacCTTCAGCTTCCCGATATCCGACGGTAGTGTgccaagactagaaccag   |
| DLGAP1_MIP_31 | gccagctacctgcaggtaccatttCTTCAGCTTCCCGATATCCGACGGTAGTGTcgctgctgaagaagagc |
| DLGAP1_MIP_32 | gtaggcctccaggaagtactgtgaCTTCAGCTTCCCGATATCCGACGGTAGTGTgctggtgaggaccagg  |
| DLGAP1_MIP_33 | ggagcaacaacagcgtcaagtCTTCAGCTTCCCGATATCCGACGGTAGTGTggatggtgacatgtgcatc  |
| DLGAP1_MIP_34 | gcgcgccgctcgtcgctcagcagCTTCAGCTTCCCGATATCCGACGGTAGTGTcccagggggcgtggt    |
| DLGAP1_MIP_35 | ggcaaacgcagcaagagcaagCTTCAGCTTCCCGATATCCGACGGTAGTGTcggccgcatccgccacct   |
| DLGAP1_MIP_36 | gaactggtccagcaggtggcCTTCAGCTTCCCGATATCCGACGGTAGTGTtggtaagagcttctgga     |
| DLGAP1_MIP_37 | gatggctatcacacctgcagtaCTTCAGCTTCCCGATATCCGACGGTAGTGTaggcactacacctgca    |
| DLGAP1_MIP_38 | gggtggtgctccactgggctcaCTTCAGCTTCCCGATATCCGACGGTAGTGTctcgtcttcagctcttg   |
| DLGAP1_MIP_39 | caccagcggaaactctccagCTTCAGCTTCCCGATATCCGACGGTAGTGTatcaggcagccgagcc      |
| DLGAP1_MIP_40 | aagaaaagggcaagtcgtaaacCTTCAGCTTCCCGATATCCGACGGTAGTGTaggtagcccggtgga     |
| SCN1B_MIP_1   | gtggcgctcgggacacggggCTTCAGCTTCCCGATATCCGACGGTAGTGTgagggggggcagcacgcgc   |
| SCN1B_MIP_2   | gcgctgctgccccctcCTTCAGCTTCCCGATATCCGACGGTAGTGTccccgtgctccgagcggcac      |
| SCN1B_MIP_3   | gatgacctcaaaattcttgcCTTCAGCTTCCCGATATCCGACGGTAGTGTggtttgtgaggggtctgg    |
| SCN1B_MIP_4   | cggtctccgagttcacctccaCTTCAGCTTCCCGATATCCGACGGTAGTGTccgcacaccttgcaaac    |
| SCN1B_MIP_5   | gttaataatagtctgtgattctCTTCAGCTTCCCGATATCCGACGGTAGTGTagtggacctccgca      |
| SCN1B_MIP_6   | ggcagccggggcaccaaaCTTCAGCTTCCCGATATCCGACGGTAGTGTggtcaggttaaggaagagag    |
| SCN1B_MIP_7   | gctcatctctccagctgcaacCTTCAGCTTCCCGATATCCGACGGTAGTGTtagcagcagcggtagagc   |
| SCN1B_MIP_8   | gctcctgcccccttaacctCTTCAGCTTCCCGATATCCGACGGTAGTGTaatgtcaccaaacctct      |
| SCN1B_MIP_9   | gctggtgtgctcgtgttttCTTCAGCTTCCCGATATCCGACGGTAGTGTgagccagcctcctctg       |
| SCN1B_MIP_10  | gcctctgttccctccagcccaCTTCAGCTTCCCGATATCCGACGGTAGTGTggagagccagatggaggg   |
| SCN1B_MIP_11  | gcctctgttctctccagcccaCTTCAGCTTCCCGATATCCGACGGTAGTGTggagagccagatggaggg   |
| SCN1B_MIP_12  | ctggagtggcagggagggctCTTCAGCTTCCCGATATCCGACGGTAGTGTctcagagacagaaggacc    |
| SCN1B_MIP_13  | atgaggattgagcagctgcaCTTCAGCTTCCCGATATCCGACGGTAGTGTcacctgtgctgatgacct    |
| SCN1B_MIP_14  | attactgctcaagaagatcgtCTTCAGCTTCCCGATATCCGACGGTAGTGTgacagctggctacc       |
| SCN1B_MIP_15  | agccatagtgtcaaccacCTTCAGCTTCCCGATATCCGACGGTAGTGTtctcctctggcaaggtgga     |
| SCN1B_MIP_16  | gatggctggcagaggggaaggCTTCAGCTTCCCGATATCCGACGGTAGTGTgggtcggtctgatgatg    |
| SCN1B_MIP_17  | catcatcagaccgaccaacccccCTTCAGCTTCCCGATATCCGACGGTAGTGTccctctgcccagccatc  |
| OTX1_MIP_1    | caccagcctcccaccctgctcCTTCAGCTTCCCGATATCCGACGGTAGTGTgctggggcgcctccacc    |
| OTX1_MIP_2    | gggtggaggcggcggcagcCTTCAGCTTCCCGATATCCGACGGTAGTGTcagggctgggagggctggtg   |
| OTX1_MIP_3    | gacatcttatcggggaggaggtCTTCAGCTTCCCGATATCCGACGGTAGTGTaccaatgaccgcggc     |
| OTX1_MIP_4    | gggtagcagcttggcgaagCTTCAGCTTCCCGATATCCGACGGTAGTGTgacctctagacctccc       |
| OTX1_MIP_5    | caagaagaagctctccagctgCTTCAGCTTCCCGATATCCGACGGTAGTGTcaacaagctcccctagc    |
| OTX1_MIP_6    | ggcggctcttggctccgctcCTTCAGCTTCCCGATATCCGACGGTAGTGTccgctgggtggcgggaaga   |
| OTX1_MIP_7    | atctatctggagccggcctccCTTCAGCTTCCCGATATCCGACGGTAGTGTctgtgtccagctctgct    |
| OTX1_MIP_8    | ccaccgggttcccactagtctCTTCAGCTTCCCGATATCCGACGGTAGTGTcacaacaggggttgctca   |
| OTX1_MIP_9    | gccctctcttctacttctCTTCAGCTTCCCGATATCCGACGGTAGTGTgcccggaccattggccgcg     |
| OTX1_MIP_10   | ggtagccttggccgtagctgcCTTCAGCTTCCCGATATCCGACGGTAGTGTggtgtagatggtggccc    |
| OTX1_MIP_11   | accaccaccacaaggctcagCTTCAGCTTCCCGATATCCGACGGTAGTGTcatgcactcaaccacc      |
| OTX1_MIP_12   | gtggtggtggcctgaggactCTTCAGCTTCCCGATATCCGACGGTAGTGTggggagttgaagttgagt    |
| OTX1_MIP_13   | ggagaagaacgcaactacctgCTTCAGCTTCCCGATATCCGACGGTAGTGTgattacaaggagcctggc   |
| SCN2A_MIP_1   | ccaacaggaacgcaagatgaCTTCAGCTTCCCGATATCCGACGGTAGTGTtaaaggagcagatgaa      |
| SCN2A_MIP_2   | caatcgctgttcaatagcagCTTCAGCTTCCCGATATCCGACGGTAGTGTcatctctgaggaatgtct    |
| SCN2A_MIP_3   | actgctattactaattggttcCTTCAGCTTCCCGATATCCGACGGTAGTGTacttggaaagcaggaaaa   |
| SCN2A_MIP_4   | cctattagaanaattagctattCTTCAGCTTCCCGATATCCGACGGTAGTGTtctaataatattctaagt  |
| SCN2A_MIP_5   | aatgtaaaggcaggggtggCTTCAGCTTCCCGATATCCGACGGTAGTGTtagatatttggaaaatgtg    |
| SCN2A_MIP_6   | actggacaaaagaatggagctCTTCAGCTTCCCGATATCCGACGGTAGTGTtggtagtcataaagatga   |
| SCN2A_MIP_7   | cacagttgtaagaatcgtgcCTTCAGCTTCCCGATATCCGACGGTAGTGTaaagaanaattgaggagct   |
| SCN2A_MIP_8   | gttggatttcacagctcattactCTTCAGCTTCCCGATATCCGACGGTAGTGTaatgtgagcttggctat  |
| SCN2A_MIP_9   | atccgtaaaaatgtgaaatctcCTTCAGCTTCCCGATATCCGACGGTAGTGTtctgtcaaggcaagcc    |
| SCN2A_MIP_10  | gtcttgagagcttggaaactCTTCAGCTTCCCGATATCCGACGGTAGTGTtaaaaaggtcttgatgaaa   |
| SCN2A_MIP_11  | gaaagtgcgaagactgaaacatCTTCAGCTTCCCGATATCCGACGGTAGTGTtaggggttcacacaca    |
| SCN2A_MIP_12  | caccgagctgacttagctcaCTTCAGCTTCCCGATATCCGACGGTAGTGTgtgtgtaacccccatta     |
| SCN2A_MIP_13  | gttcatgggcaacctacgaaCTTCAGCTTCCCGATATCCGACGGTAGTGTccccctctgatttgttgg    |
| SCN2A_MIP_14  | actgcaatctattagcgcaCTTCAGCTTCCCGATATCCGACGGTAGTGTgctcactgtcctattgaaa    |
| SCN2A_MIP_15  | gttctctaaatataatatttCTTCAGCTTCCCGATATCCGACGGTAGTGTcacttctctttaaaca      |
| SCN2A_MIP_16  | gtgtcaataacctgccacctCTTCAGCTTCCCGATATCCGACGGTAGTGTtctattcttctttaa       |
| SCN2A_MIP_17  | aatcctgtaaaacactcagccCTTCAGCTTCCCGATATCCGACGGTAGTGTggactgaaactagtagg    |
| SCN2A_MIP_18  | gtccttattctctcagctCTTCAGCTTCCCGATATCCGACGGTAGTGTccgttattgacctctctt      |
| SCN2A_MIP_19  | ggggttctaccgcttcaCTTCAGCTTCCCGATATCCGACGGTAGTGTtatgattctcagaaaaatga     |
| SCN2A_MIP_20  | aggaacagaatcaggccacatCTTCAGCTTCCCGATATCCGACGGTAGTGTaaatctctctccatttg    |
| SCN2A_MIP_21  | ataggcattggcaccacagcCTTCAGCTTCCCGATATCCGACGGTAGTGTaaaacaaggacgctatgc    |
| SCN2A_MIP_22  | gaaaaagagctgaaaaacagaagCTTCAGCTTCCCGATATCCGACGGTAGTGTacatacttggccctt    |
| SCN2A_MIP_23  | ggagctcaacttagatgctactCTTCAGCTTCCCGATATCCGACGGTAGTGTaacggaaacctttctc    |
| SCN2A_MIP_24  | ccacaccaggtaaaaatataaaCTTCAGCTTCCCGATATCCGACGGTAGTGTgaaacagcttgagaaga   |

|              |                                                                       |
|--------------|-----------------------------------------------------------------------|
| SCN2A_MIP_25 | atctctttcatatgtcagcctCTTCAGCTTCCCGATATCCGACGGTAGTGtactctgaaagcattgtgc |
| SCN2A_MIP_26 | ggctctgagaatgactttgcCTTCAGCTTCCCGATATCCGACGGTAGTGtctctctcatctattttg   |
| SCN2A_MIP_27 | gtcttgagagaaaaaggagccCTTCAGCTTCCCGATATCCGACGGTAGTGtggcacgaacagagagtct |
| SCN2A_MIP_28 | atgcatagcctgtggactCTTCAGCTTCCCGATATCCGACGGTAGTGtaccttggagacaatgacag   |
| SCN2A_MIP_29 | cccattcatggcagagatggCTTCAGCTTCCCGATATCCGACGGTAGGTcacaactctctcacatcag  |
| SCN2A_MIP_30 | gtattttgaccaacaccatggCTTCAGCTTCCCGATATCCGACGGTAGGTtcatctgaaattctacttc |
| SCN2A_MIP_31 | aacatgataagaactggaccCTTCAGCTTCCCGATATCCGACGGTAGGTtttcatcattaccaagca   |
| SCN2A_MIP_32 | acctggtgtaatggaccaCTTCAGCTTCCCGATATCCGACGGTAGGTggattctaacttttttctt    |
| SCN2A_MIP_33 | gtttcaccttaaccatggtttaCTTCAGCTTCCCGATATCCGACGGTAGGTcagacagtcactgtctg  |
| SCN2A_MIP_34 | gagttataattgcttagtgaactTCAGCTTCCCGATATCCGACGGTAGGTcaccatctgattgtct    |
| SCN2A_MIP_35 | ccttagtttaatggaactgCTTCAGCTTCCCGATATCCGACGGTAGGTataatgaaactacttctca   |
| SCN2A_MIP_36 | atccatggcaattatcttgagaCTTCAGCTTCCCGATATCCGACGGTAGGTgtaattaccagccgga   |
| SCN2A_MIP_37 | catcattataatattttgaatCTTCAGCTTCCCGATATCCGACGGTAGGTtttggcaaatgtggaag   |
| SCN2A_MIP_38 | catcgtctcatttttctgtCTTCAGCTTCCCGATATCCGACGGTAGGTcactgttctgtctttatt    |
| SCN2A_MIP_39 | ggccaataccaaggtgaggtCTTCAGCTTCCCGATATCCGACGGTAGGTcaggaaggatggaaaaaagt |
| SCN2A_MIP_40 | atgatggtcatggtgattggaatCTTCAGCTTCCCGATATCCGACGGTAGGTcagcctgacacatgca  |
| SCN2A_MIP_41 | gtttggccagcactccatCTTCAGCTTCCCGATATCCGACGGTAGGTacaaaatattctcagtga     |
| SCN2A_MIP_42 | atgcagaagaatcgattttgCTTCAGCTTCCCGATATCCGACGGTAGGTgtttttctcgtctgttt    |
| SCN2A_MIP_43 | cccacagcaatctggagattCTTCAGCTTCCCGATATCCGACGGTAGGTcagcgtctttttattatt   |
| SCN2A_MIP_44 | gaaaaatatgctggtgaaagCTTCAGCTTCCCGATATCCGACGGTAGGTaaaccgcttgaagatct    |
| SCN2A_MIP_45 | gctgcctatgccactagtagtCTTCAGCTTCCCGATATCCGACGGTAGGTctgctgaattcttcagtat |
| SCN2A_MIP_46 | cagggttttaaatgctgCTTCAGCTTCCCGATATCCGACGGTAGGTgagaatctgactttgaaaa     |
| SCN2A_MIP_47 | cctgtttacagaagtaagcCTTCAGCTTCCCGATATCCGACGGTAGGTgttttttctgggattgat    |
| SCN2A_MIP_48 | gggagctcaaatcaaccgCTTCAGCTTCCCGATATCCGACGGTAGGTataaataggaaaaatgggt    |
| SCN2A_MIP_49 | aactctggtggaattgaggaCTTCAGCTTCCCGATATCCGACGGTAGGTaatgaatccccaccaaca   |
| SCN2A_MIP_50 | gcttatctgacaacactgaaactCTTCAGCTTCCCGATATCCGACGGTAGGTatcacctaccagagccc |
| SCN2A_MIP_51 | atgagaagaatatgtgtagctCTTCAGCTTCCCGATATCCGACGGTAGGTtattctgctgagcagt    |
| SCN2A_MIP_52 | gttgcatatggtttcaagtCTTCAGCTTCCCGATATCCGACGGTAGGTaatgaaatttttgactt     |
| SCN2A_MIP_53 | gtgaaaacctgtgcatattCTTCAGCTTCCCGATATCCGACGGTAGGTgaaataagcagcaaatg     |
| SCN2A_MIP_54 | cggtttgaaggatgaggttaCTTCAGCTTCCCGATATCCGACGGTAGGTaaaattgtgtgcttttc    |
| SCN2A_MIP_55 | gacaaagctctcagtgccctCTTCAGCTTCCCGATATCCGACGGTAGGTtcagatgaatgtgtaagac  |
| SCN2A_MIP_56 | gctggcaagtttaccattgtCTTCAGCTTCCCGATATCCGACGGTAGGTtatttttctctctcatct   |
| SCN2A_MIP_57 | gagattcactccatgatactCTTCAGCTTCCCGATATCCGACGGTAGGTtccattttccacctgg     |
| SCN2A_MIP_58 | gagtctaaagtttttctctcCTTCAGCTTCCCGATATCCGACGGTAGGTattgagagcaatcaaac    |
| SCN2A_MIP_59 | atattgtaatttagtataCTTCAGCTTCCCGATATCCGACGGTAGGTgaaaaatgatgacttttct    |
| SCN2A_MIP_60 | gaaaagtcatatcattttcttttCTTCAGCTTCCCGATATCCGACGGTAGGTactaaattacaatatt  |
| SCN2A_MIP_61 | catagataactcaaccaacagCTTCAGCTTCCCGATATCCGACGGTAGGTtacaattctcatattc    |
| SCN2A_MIP_62 | gattcaaggtaaagaatgaaccaCTTCAGCTTCCCGATATCCGACGGTAGGTattgcatttggaggct  |
| SCN2A_MIP_63 | catacctcgacctgctgaaCTTCAGCTTCCCGATATCCGACGGTAGGTgcaaaagcacaattttaa    |
| SCN2A_MIP_64 | gtatttctctgttctctgtcaCTTCAGCTTCCCGATATCCGACGGTAGGTtagaaattcgggctgtg   |
| SCN2A_MIP_65 | ggaaccgatgaccagagctCTTCAGCTTCCCGATATCCGACGGTAGGTtctaatggaactttatcat   |
| SCN2A_MIP_66 | ggtgacctgttaaggcagaCTTCAGCTTCCCGATATCCGACGGTAGGTtagtgaatagtagaacgaa   |
| SCN2A_MIP_67 | ggtaaagaagggtgctttattCTTCAGCTTCCCGATATCCGACGGTAGGTctggattaatctggtgtt  |
| SCN2A_MIP_68 | caccacaaatcaaaaatttcttCTTCAGCTTCCCGATATCCGACGGTAGGTtttgggagttgggatg   |
| SCN2A_MIP_69 | caggattggcgaatcctactCTTCAGCTTCCCGATATCCGACGGTAGGTtaaactttcatttctacta  |
| SCN2A_MIP_70 | gatcactcggaacaggtaggCTTCAGCTTCCCGATATCCGACGGTAGGTaatcatgaccagaaaagaa  |
| SCN2A_MIP_71 | cctttggcaacagcatgactCTTCAGCTTCCCGATATCCGACGGTAGGTtcccttctgctgtttt     |
| SCN2A_MIP_72 | atcccaacttccctttaacatCTTCAGCTTCCCGATATCCGACGGTAGGTgtagggctcagctctgg   |
| SCN2A_MIP_73 | cctgggtggtgaaactgtCTTCAGCTTCCCGATATCCGACGGTAGGTtagcacattcttaatagtg    |
| SCN2A_MIP_74 | aagaaaatccaacagatgggCTTCAGCTTCCCGATATCCGACGGTAGGTagaactctcaaagtcatc   |
| SCN2A_MIP_75 | cctcttctatgacaaaaccaCTTCAGCTTCCCGATATCCGACGGTAGGTagaagtgcagagcctct    |
| SCN2A_MIP_76 | atccaggcatctgcaaaatcaCTTCAGCTTCCCGATATCCGACGGTAGGTcactctcaccacaaacac  |
| SCN2A_MIP_77 | caaagtctctatgagccattactCTTCAGCTTCCCGATATCCGACGGTAGGTgtgagtggtgaccgga  |
| SCN2A_MIP_78 | gaatcgtcttccatctgtaCTTCAGCTTCCCGATATCCGACGGTAGGTcttttaacttttcttca     |
| SCN2A_MIP_79 | caactccagagaaaaccgatCTTCAGCTTCCCGATATCCGACGGTAGGTgcttacagacgctacctc   |
| SCN2A_MIP_80 | attctcattcagttatcaatCTTCAGCTTCCCGATATCCGACGGTAGGTctgatatttccctttgt    |
| SCN2A_MIP_81 | actcccacagggtctatgcCTTCAGCTTCCCGATATCCGACGGTAGGTaaagacaaatcagaaaagg   |
| ADAM23_MIP_1 | ccccggccgcacgcccctCTTCAGCTTCCCGATATCCGACGGTAGGTcggcggccggagctatga     |
| ADAM23_MIP_2 | gtggcaggcaccagcggcCTTCAGCTTCCCGATATCCGACGGTAGGTcgcaaaaggccagggccat    |
| ADAM23_MIP_3 | gaaagaaatcacactgcttcaagCTTCAGCTTCCCGATATCCGACGGTAGGTacccttaccctccac   |
| ADAM23_MIP_4 | caatgtattgtcttcatctgccCTTCAGCTTCCCGATATCCGACGGTAGGTtgcctttgttcaagaa   |
| ADAM23_MIP_5 | gaatctgagttcacaattttactCTTCAGCTTCCCGATATCCGACGGTAGGTcggaagcccttatca   |
| ADAM23_MIP_6 | cagggtcaataaagctttgtCTTCAGCTTCCCGATATCCGACGGTAGGTcttctgtcttttgaatcc   |
| ADAM23_MIP_7 | gattcaaaaagacagaagaacctCTTCAGCTTCCCGATATCCGACGGTAGGTtagcttattgacctgc  |
| ADAM23_MIP_8 | gttaccggctcgcaagtaCTTCAGCTTCCCGATATCCGACGGTAGGTgattgttttaacctccaa     |

|               |                                                                        |
|---------------|------------------------------------------------------------------------|
| ADAM23_MIP_9  | gacacttggaggtttaaaaaaatCTTCAGCTTCCCGATATCCGACGGTAGTGTgacttccgacgcg     |
| ADAM23_MIP_10 | gtggctctgtcaacctgcaatCTTCAGCTTCCCGATATCCGACGGTAGTGTttttgctttatggaagca  |
| ADAM23_MIP_11 | cgctctgatgtctccatggtCTTCAGCTTCCCGATATCCGACGGTAGTGTgcacggaagagctactaaa  |
| ADAM23_MIP_12 | gcaactttgtcttggagaagaaCTTCAGCTTCCCGATATCCGACGGTAGTGTgtgtggttcttttgg    |
| ADAM23_MIP_13 | gcacaaaagaaccacacacaaaCTTCAGCTTCCCGATATCCGACGGTAGTGTctctcaaaagacaaagt  |
| ADAM23_MIP_14 | gcaaatgaagaatctcagtaagCTTCAGCTTCCCGATATCCGACGGTAGTGTaaagtccaacactgtt   |
| ADAM23_MIP_15 | aggttttctggattatatgtggtCTTCAGCTTCCCGATATCCGACGGTAGTGTtccacttccaacaagcc |
| ADAM23_MIP_16 | cctattttactcaatgaagtCTTCAGCTTCCCGATATCCGACGGTAGTGTattttgactactaattttc  |
| ADAM23_MIP_17 | cagaaaagaaaaatagatcCTTCAGCTTCCCGATATCCGACGGTAGTGTcacatgacttcattgagta   |
| ADAM23_MIP_18 | gtaagaatatagagtcagtggtCTTCAGCTTCCCGATATCCGACGGTAGTGTtagtgacactagagaga  |
| ADAM23_MIP_19 | gttttgatcattaaacatCTTCAGCTTCCCGATATCCGACGGTAGTGTaaatcaagtcaactaatg     |
| ADAM23_MIP_20 | gtccaagatggaatggttaCTTCAGCTTCCCGATATCCGACGGTAGTGTggcagtgactggtatga     |
| ADAM23_MIP_21 | aatacataccagtcactgccCTTCAGCTTCCCGATATCCGACGGTAGTGTaaaccattccacttggc    |
| ADAM23_MIP_22 | gttctcaaaataccggcagcgCTTCAGCTTCCCGATATCCGACGGTAGTGTactgtctgtgtatacc    |
| ADAM23_MIP_23 | gagcatctgcacaggttggCTTCAGCTTCCCGATATCCGACGGTAGTGTgaacccaaaagggataa     |
| ADAM23_MIP_24 | atctttgcatctgttcttttCTTCAGCTTCCCGATATCCGACGGTAGTGTatagactgctttttct     |
| ADAM23_MIP_25 | gaaaaagcagtgctatcagaaaCTTCAGCTTCCCGATATCCGACGGTAGTGTgaacagatgcaaatga   |
| ADAM23_MIP_26 | actgaccttactcattttcaCTTCAGCTTCCCGATATCCGACGGTAGTGTctcccacacatttcaa     |
| ADAM23_MIP_27 | agagttgaaagtgtgtggagCTTCAGCTTCCCGATATCCGACGGTAGTGTgaaaaatgagtaagaaggt  |
| ADAM23_MIP_28 | cttttgcataaattgtgtgCTTCAGCTTCCCGATATCCGACGGTAGTGTtctttgtctttttct       |
| ADAM23_MIP_29 | agaagaaaaaggaaacaaagaCTTCAGCTTCCCGATATCCGACGGTAGTGTacacagcaattttgcaaa  |
| ADAM23_MIP_30 | cctttcaacaggccaacaaaCTTCAGCTTCCCGATATCCGACGGTAGTGTctgatgattgcttttgta   |
| ADAM23_MIP_31 | ggctccactctctgttaaCTTCAGCTTCCCGATATCCGACGGTAGTGTacaagaacctgctttcc      |
| ADAM23_MIP_32 | atcttactgtgcaaacaggCTTCAGCTTCCCGATATCCGACGGTAGTGTccctctgtcctaacttc     |
| ADAM23_MIP_33 | gagattaggacagaaaggaaaCTTCAGCTTCCCGATATCCGACGGTAGTGTgtttgaccaagtaagat   |
| ADAM23_MIP_34 | gtttctgacagtttcatcttttCTTCAGCTTCCCGATATCCGACGGTAGTGTgctcttcgcttactcac  |
| ADAM23_MIP_35 | acacttcacgtgagtaagcgCTTCAGCTTCCCGATATCCGACGGTAGTGTtaaaagaagatgaaactg   |
| ADAM23_MIP_36 | catttactgtacaggttgatCTTCAGCTTCCCGATATCCGACGGTAGTGTatttgaattttgattt     |
| ADAM23_MIP_37 | caaatcaaaattcaatataagaCTTCAGCTTCCCGATATCCGACGGTAGTGTactgtacaagtaaaat   |
| ADAM23_MIP_38 | gtaatttaaaaggattcatCTTCAGCTTCCCGATATCCGACGGTAGTGTattatctgaagctacctagc  |
| ADAM23_MIP_39 | cagcatgctaggtaccttcaCTTCAGCTTCCCGATATCCGACGGTAGTGTtttcaatgaactctttta   |
| ADAM23_MIP_40 | cattttcttaatagtttcttCTTCAGCTTCCCGATATCCGACGGTAGTGTgctccacatgtgtgc      |
| ADAM23_MIP_41 | gggacaggagcacacatgtCTTCAGCTTCCCGATATCCGACGGTAGTGTgcagagaagaacactataa   |
| ADAM23_MIP_42 | agtgtcagctctaaggcaCTTCAGCTTCCCGATATCCGACGGTAGTGTcttctctgctacttccaa     |
| ADAM23_MIP_43 | ggagataggcaagagaagaaaaCTTCAGCTTCCCGATATCCGACGGTAGTGTcttagagtgaccactca  |
| ADAM23_MIP_44 | gggtgattgactgaggtaaCTTCAGCTTCCCGATATCCGACGGTAGTGTtctgttttttctttacac    |
| ADAM23_MIP_45 | gcctgatggtagaaggaagtCTTCAGCTTCCCGATATCCGACGGTAGTGTcttctctgttaaaaact    |
| ADAM23_MIP_46 | gccctaaatatgagcagctgtCTTCAGCTTCCCGATATCCGACGGTAGTGTatgggatcttttctgttt  |
| ADAM23_MIP_47 | gaattgtagcacttccgatCTTCAGCTTCCCGATATCCGACGGTAGTGTattaaggtccagctactgt   |
| ADAM23_MIP_48 | cccaagggttgtgtattttCTTCAGCTTCCCGATATCCGACGGTAGTGTccatctgttctttttc      |
| ADAM23_MIP_49 | ggggtgaagttcctaactgCTTCAGCTTCCCGATATCCGACGGTAGTGTcagatattctatgtgtctc   |
| ADAM23_MIP_50 | gccgatgtcttctctcagCTTCAGCTTCCCGATATCCGACGGTAGTGTatgactcttctccatgat     |
| ADAM23_MIP_51 | gatcatgggaagagatcatatCTTCAGCTTCCCGATATCCGACGGTAGTGTgagaagaagacatcgcg   |
| ADAM23_MIP_52 | cagcagtggtactggaactattCTTCAGCTTCCCGATATCCGACGGTAGTGTtcttttactcactctg   |
| ADAM23_MIP_53 | ccagagtgagtaaaagaagtCTTCAGCTTCCCGATATCCGACGGTAGTGTagtccagtaaacactgct   |
| EPHA6_MIP_1   | cctggacctctgctcttcttCTTCAGCTTCCCGATATCCGACGGTAGTGTccaagtgaatgctctcg    |
| EPHA6_MIP_2   | gcaggtgcagctgttccgagCTTCAGCTTCCCGATATCCGACGGTAGTGTgtagggggtcctgtccac   |
| EPHA6_MIP_3   | gggctgcaagtcgggaatttCTTCAGCTTCCCGATATCCGACGGTAGTGTgggtggagggaagagg     |
| EPHA6_MIP_4   | ggctctctttctctccctaaaCTTCAGCTTCCCGATATCCGACGGTAGTGTcggcctctccctacc     |
| EPHA6_MIP_5   | actggttgcctctgaggtCTTCAGCTTCCCGATATCCGACGGTAGTGTaatttggtttcttctgct     |
| EPHA6_MIP_6   | gtcttttttagatttttaagtCTTCAGCTTCCCGATATCCGACGGTAGTGTagaattcatggaatttt   |
| EPHA6_MIP_7   | aattaaatagaaaataaaaattCTTCAGCTTCCCGATATCCGACGGTAGTGTactattaggagatctta  |
| EPHA6_MIP_8   | cccgtgatgagctcagaaaCTTCAGCTTCCCGATATCCGACGGTAGTGTattactttttcccttttg    |
| EPHA6_MIP_9   | atccagttgtacgaagcagctCTTCAGCTTCCCGATATCCGACGGTAGTGTggactcatctgattccat  |
| EPHA6_MIP_10  | atcgcatcctcaaacctcaacCTTCAGCTTCCCGATATCCGACGGTAGTGTctgcaaaagaacattaat  |
| EPHA6_MIP_11  | cccaaatccatctgggtaaaaCTTCAGCTTCCCGATATCCGACGGTAGTGTattctgtgaaaaacacg   |
| EPHA6_MIP_12  | cctctttggttgaagtacggCTTCAGCTTCCCGATATCCGACGGTAGTGTgattttatctggctttcaa  |
| EPHA6_MIP_13  | ggaatcaaccttggaaatgtaCTTCAGCTTCCCGATATCCGACGGTAGTGTcatatctgtactgcaga   |
| EPHA6_MIP_14  | aaaagttttatttttaaatCTTCAGCTTCCCGATATCCGACGGTAGTGTggagctgatggagatggc    |
| EPHA6_MIP_15  | aagggttatttccgagctgaCTTCAGCTTCCCGATATCCGACGGTAGTGTaaagtgtttttctcttt    |
| EPHA6_MIP_16  | ccatgtatgttaaactgtgtgCTTCAGCTTCCCGATATCCGACGGTAGTGTaaaagacaaaagggttg   |
| EPHA6_MIP_17  | gacacaggagggaagaaaCTTCAGCTTCCCGATATCCGACGGTAGTGTgccataattcattgtcctat   |
| EPHA6_MIP_18  | ggtgggtccttcaaaaatCTTCAGCTTCCCGATATCCGACGGTAGTGTtggatgacagcctgtatg     |
| EPHA6_MIP_19  | agtttttctccaagccattcacCTTCAGCTTCCCGATATCCGACGGTAGTGTgtggaggagactcgg    |
| EPHA6_MIP_20  | aagggttaattcagtgagacCTTCAGCTTCCCGATATCCGACGGTAGTGTaagaaaattatgggtctg   |

|               |                                                                        |
|---------------|------------------------------------------------------------------------|
| EPHA6_MIP_21  | cattctggactacgagatcaaCTTCAGCTTCCCGATATCCGACGGTAGTGTtctctgccaattaattctt |
| EPHA6_MIP_22  | caggtgcttgcgatgtaggCTTCAGCTTCCCGATATCCGACGGTAGTGTaatatagataaacgacatgc  |
| EPHA6_MIP_23  | cacatccgagtgagaactgcCTTCAGCTTCCCGATATCCGACGGTAGTGTaactctgtttcattctctt  |
| EPHA6_MIP_24  | gctttggaccttggaagagCTTCAGCTTCCCGATATCCGACGGTAGTGTgaaactacttcatctcc     |
| EPHA6_MIP_25  | gtgtcccaagtttttaatagcttgCTTCAGCTTCCCGATATCCGACGGTAGTGTacaggatacagtggt  |
| EPHA6_MIP_26  | caggctctcaatgatgtctCTTCAGCTTCCCGATATCCGACGGTAGTGTctcttggttcattatattcc  |
| EPHA6_MIP_27  | gaaccaagagaaaataatagactCTTCAGCTTCCCGATATCCGACGGTAGTGTtagctggattggccc   |
| EPHA6_MIP_28  | actttattcttctgatcactggCTTCAGCTTCCCGATATCCGACGGTAGTGTgtgaaatgcaccagg    |
| EPHA6_MIP_29  | aggatgacgaggagagtgatccCTTCAGCTTCCCGATATCCGACGGTAGTGTcctcaggtgtcttgt    |
| EPHA6_MIP_30  | cgcaggactttcttctcattCTTCAGCTTCCCGATATCCGACGGTAGTGTtgtatgcatcactctt     |
| EPHA6_MIP_31  | gaagtatgatcacaatgcaaaCTTCAGCTTCCCGATATCCGACGGTAGTGTagaagctctgcgct      |
| EPHA6_MIP_32  | cctcaagaattcgattgagagagCTTCAGCTTCCCGATATCCGACGGTAGTGTctcaaaactaatcaat  |
| EPHA6_MIP_33  | cctttgcaaattcatggactgCTTCAGCTTCCCGATATCCGACGGTAGTGTgccaagatttaagatagt  |
| EPHA6_MIP_34  | actttgaaaggtggccacatgCTTCAGCTTCCCGATATCCGACGGTAGTGTactcttctgaaatgtaagt |
| EPHA6_MIP_35  | gatctctctttccctggtctCTTCAGCTTCCCGATATCCGACGGTAGTGTtttggtgacaacctt      |
| EPHA6_MIP_36  | attaaaggaataacttagttcagCTTCAGCTTCCCGATATCCGACGGTAGTGTccaacatcattcgct   |
| EPHA6_MIP_37  | catccagtgccagggggaggCTTCAGCTTCCCGATATCCGACGGTAGTGTgcttttcataaagaagac   |
| EPHA6_MIP_38  | ggggcctggatgctatttaaCTTCAGCTTCCCGATATCCGACGGTAGTGTtcatttgtatttggggcc   |
| EPHA6_MIP_39  | gttctatatttaactttatcaCTTCAGCTTCCCGATATCCGACGGTAGTGTgtatctcttctct       |
| EPHA6_MIP_40  | gttaagagataaccagctggCTTCAGCTTCCCGATATCCGACGGTAGTGTaacaccttaccgcaaaa    |
| EPHA6_MIP_41  | gatatgggttattgtcatcgagCTTCAGCTTCCCGATATCCGACGGTAGTGTgcacacactgcataaaa  |
| EPHA6_MIP_42  | gaaagatacttcatgctgatgCTTCAGCTTCCCGATATCCGACGGTAGTGTtgggtataagcagcttc   |
| EPHA6_MIP_43  | ccttcctaatttctgcttgaCTTCAGCTTCCCGATATCCGACGGTAGTGTtggctctccagagtgct    |
| EPHA6_MIP_44  | aagacatagcctacacccaaCTTCAGCTTCCCGATATCCGACGGTAGTGTgataaattacagttctgta  |
| EPHA6_MIP_45  | gttaacagaactgtaattatgcaCTTCAGCTTCCCGATATCCGACGGTAGTGTtgggtgtaggtatgct  |
| EPHA6_MIP_46  | gtcatgtcctatggagagagaCTTCAGCTTCCCGATATCCGACGGTAGTGTtagtaagaaatccaatt   |
| EPHA6_MIP_47  | cccacatgacaatgcatagcCTTCAGCTTCCCGATATCCGACGGTAGTGTgaggacaaaaggcataat   |
| EPHA6_MIP_48  | gaaggagagaaatcacagaccCTTCAGCTTCCCGATATCCGACGGTAGTGTgctcaaaaaaagagagt   |
| EPHA6_MIP_49  | gccagcagtgaggactcagcCTTCAGCTTCCCGATATCCGACGGTAGTGTaaaaaacacattatgcc    |
| EPHA6_MIP_50  | cgtagcagcagggtttcaaaCTTCAGCTTCCCGATATCCGACGGTAGTGTctcatgttttggtt       |
| EPHA6_MIP_51  | agttattctgtattgccccatCTTCAGCTTCCCGATATCCGACGGTAGTGTggtgtctgtatagca     |
| EPHA6_MIP_52  | gtatgaaagtaccacaagcaccCTTCAGCTTCCCGATATCCGACGGTAGTGTtctctctcttctt      |
| EPHA6_MIP_53  | gaaatccctctctctgtatgCTTCAGCTTCCCGATATCCGACGGTAGTGTagtctgaacagaagactg   |
| CPLX1_MIP_1   | caggatgctctctctctctctCTTCAGCTTCCCGATATCCGACGGTAGTGTtccctcagggcctcc     |
| CPLX1_MIP_2   | caggacatgctcaagaagtagccCTTCAGCTTCCCGATATCCGACGGTAGTGTatggaggccaactccga |
| CPLX1_MIP_3   | ccggcgggccgagcctctctCTTCAGCTTCCCGATATCCGACGGTAGTGTcttcttggggccgctcaagc |
| CPLX1_MIP_4   | ccttcttggcggctctgggtCTTCAGCTTCCCGATATCCGACGGTAGTGTaggcggggccggccggcg   |
| CPLX1_MIP_5   | aggagcgaaggccaagtacCTTCAGCTTCCCGATATCCGACGGTAGTGTggtctgaatcaccaactct   |
| CPLX1_MIP_6   | cagaactcacagcaagtaggCTTCAGCTTCCCGATATCCGACGGTAGTGTctgtgtgggtctctc      |
| CPLX1_MIP_7   | acatggagagaccacacagcaCTTCAGCTTCCCGATATCCGACGGTAGTGTgccatacttgcgtgtgag  |
| SLC1A3_MIP_1  | gaacattacaaggaggatgtaCTTCAGCTTCCCGATATCCGACGGTAGTGTagaagagacctctag     |
| SLC1A3_MIP_2  | gactcctgctggaatctctctCTTCAGCTTCCCGATATCCGACGGTAGTGTaatcaaatgactacca    |
| SLC1A3_MIP_3  | cctaggcttctctgaactgcaCTTCAGCTTCCCGATATCCGACGGTAGTGTcagtcaccctgctcatt   |
| SLC1A3_MIP_4  | gggaactctgatgagatgCTTCAGCTTCCCGATATCCGACGGTAGTGTtcttctgtttcaaaaag      |
| SLC1A3_MIP_5  | ggagaagtagtctctctctCTTCAGCTTCCCGATATCCGACGGTAGTGTtctttgcaataaacacac    |
| SLC1A3_MIP_6  | catcatcctctctgggaaggCTTCAGCTTCCCGATATCCGACGGTAGTGTatcttctgtttgctccac   |
| SLC1A3_MIP_7  | gacaatgattgccaatcaccacCTTCAGCTTCCCGATATCCGACGGTAGTGTacccaaaaggcgggc    |
| SLC1A3_MIP_8  | ccctcttctctctctctctCTTCAGCTTCCCGATATCCGACGGTAGTGTaaagtactattcttctt     |
| SLC1A3_MIP_9  | caaaagaaagtaatagtcactgCTTCAGCTTCCCGATATCCGACGGTAGTGTgagcagggaaaagagg   |
| SLC1A3_MIP_10 | gaatcacagaggagctgctCTTCAGCTTCCCGATATCCGACGGTAGTGTctgtgtcttttatttt      |
| SLC1A3_MIP_11 | agacacattgtttatcacagcaCTTCAGCTTCCCGATATCCGACGGTAGTGTctctcatgtttcaatca  |
| SLC1A3_MIP_12 | ggtagcagtaataatgtgtatgCTTCAGCTTCCCGATATCCGACGGTAGTGTaatggagtaagctcc    |
| SLC1A3_MIP_13 | gtctcatgatggcttctgtaaCTTCAGCTTCCCGATATCCGACGGTAGTGTgagataactgcaattggcc |
| SLC1A3_MIP_14 | ggcttactcattcacgagctcatCTTCAGCTTCCCGATATCCGACGGTAGTGTtgggtgttctctccc   |
| SLC1A3_MIP_15 | cccccaatcacacctgtcttctCTTCAGCTTCCCGATATCCGACGGTAGTGTgcttgcaaacctctt    |
| SLC1A3_MIP_16 | gggtgtaggagaagcatttCTTCAGCTTCCCGATATCCGACGGTAGTGTgaaaaaccttgggtttt     |
| SLC1A3_MIP_17 | actgacctatgaggtcttCTTCAGCTTCCCGATATCCGACGGTAGTGTgacctattcactgtct       |
| SLC1A3_MIP_18 | cggggagcacgaatctggtCTTCAGCTTCCCGATATCCGACGGTAGTGTatagacactttctctgtac   |
| SLC1A3_MIP_19 | cctgaggccagagttcaagCTTCAGCTTCCCGATATCCGACGGTAGTGTtctggacaaattatacaat   |
| SLC1A3_MIP_20 | gctcatcatcgctgggactCTTCAGCTTCCCGATATCCGACGGTAGTGTctgttctggtactctgtta   |
| SLC1A3_MIP_21 | gatgtctgagtgaggcctCTTCAGCTTCCCGATATCCGACGGTAGTGTtctcagagttcttctgta     |
| SLC1A3_MIP_22 | gggtaactcagtgattgaagagCTTCAGCTTCCCGATATCCGACGGTAGTGTtttccctctcccacc    |
| SLC1A3_MIP_23 | cagttcatgtctgacaagtgCTTCAGCTTCCCGATATCCGACGGTAGTGTatgtagtctacatcttgg   |
| SLC1A3_MIP_24 | atcttcccttctctctctctgaCTTCAGCTTCCCGATATCCGACGGTAGTGTagaacctatcgacagt   |
| GABRA1_MIP_1  | gactggaagaagtgaggacCTTCAGCTTCCCGATATCCGACGGTAGTGTataacctgatgttcttgc    |

|               |                                                                       |
|---------------|-----------------------------------------------------------------------|
| GABRA1_MIP_2  | cctcatcgcggctggagcaCTTCAGCTCCCGATATCCGACGGTAGTGTccccgataaaataaatgaaa  |
| GABRA1_MIP_3  | gattgggaggtaggttgcattCTTCAGCTCCCGATATCCGACGGTAGTGTtattgcttcttattgttt  |
| GABRA1_MIP_4  | gtcctaaatcctggtgaagacCTTCAGCTCCCGATATCCGACGGTAGTGTtttgaccatttagaggtaa |
| GABRA1_MIP_5  | catgatatggaatggtgacactCTTCAGCTCCCGATATCCGACGGTAGTGTcagatgtggtggtgaga  |
| GABRA1_MIP_6  | gaaacgggtccgaaactggtCTTCAGCTCCCGATATCCGACGGTAGTGTcacaaaagtagccaaga    |
| GABRA1_MIP_7  | ggactccggacacattttcCTTCAGCTCCCGATATCCGACGGTAGTGTcgtcattttccaaaattacc  |
| GABRA1_MIP_8  | gattttacttccattaggttattCTTCAGCTCCCGATATCCGACGGTAGTGTgcagccatccttacc   |
| GABRA1_MIP_9  | ccttgtttcaaccttaacaatCTTCAGCTCCCGATATCCGACGGTAGTGTtaggatggcaccttgcgtg |
| GABRA1_MIP_10 | acttttcttgattgaagtcttaCTTCAGCTCCCGATATCCGACGGTAGTGTttgttcttctatg      |
| GABRA1_MIP_11 | gggaaacatagaatacaacaCTTCAGCTCCCGATATCCGACGGTAGTGTtaaatgacttaacaatcaag |
| GABRA1_MIP_12 | acgtctaaaccagatgacctCTTCAGCTCCCGATATCCGACGGTAGTGTtagagaattgaagtggtaaa |
| GABRA1_MIP_13 | cgtgctgctctctggtccaCTTCAGCTCCCGATATCCGACGGTAGTGTtcttcttccataactga     |
| GABRA1_MIP_14 | gtgattctctcacaagtctccCTTCAGCTCCCGATATCCGACGGTAGTGTaaagtcaaatgtctcatct |
| GABRA1_MIP_15 | gaataacaaagtagccaattcttCTTCAGCTCCCGATATCCGACGGTAGTGTataccttcttgcgt    |
| GABRA1_MIP_16 | ggtttattgccgtgctatCTTCAGCTCCCGATATCCGACGGTAGTGTcagatgaaactggcatca     |
| GABRA1_MIP_17 | ccatagctgtgcataagccCTTCAGCTCCCGATATCCGACGGTAGTGTtaaaagcattaccctttct   |
| GABRA1_MIP_18 | gtttggcctggtgattggCTTCAGCTCCCGATATCCGACGGTAGTGTtccacagtaaaactttca     |
| GABRA1_MIP_19 | accctaattggccaggggCTTCAGCTCCCGATATCCGACGGTAGTGTtcaagcaacttaattttgc    |
| GABRA1_MIP_20 | gctggtgctgtggagcgtCTTCAGCTCCCGATATCCGACGGTAGTGTttgtctgacactgttaaagg   |
| GABRA1_MIP_21 | ctaaaagccccacacacatcCTTCAGCTCCCGATATCCGACGGTAGTGTaccacagaaaccaagaa    |
| GABRA1_MIP_22 | gaggctctctgtttaatacagCTTCAGCTCCCGATATCCGACGGTAGTGTtctttaaagcagaggcaa  |
| GABRG2_MIP_1  | gacggtgtgattctgctctCTTCAGCTCCCGATATCCGACGGTAGTGTaaaggggagggtcttct     |
| GABRG2_MIP_2  | actgagcttctgctctcatatCTTCAGCTCCCGATATCCGACGGTAGTGTccccacacttcccc      |
| GABRG2_MIP_3  | cctgagggtgatgctactctCTTCAGCTCCCGATATCCGACGGTAGTGTaaaagtcaactgtgtgta   |
| GABRG2_MIP_4  | catcatcagatttctggctagCTTCAGCTCCCGATATCCGACGGTAGTGTaaacctctatatacaggc  |
| GABRG2_MIP_5  | caaggaagattaaattatacttCTTCAGCTCCCGATATCCGACGGTAGTGTcggaaagataagaca    |
| GABRG2_MIP_6  | gttgagagaaaatgtgatCTTCAGCTCCCGATATCCGACGGTAGTGTcatttctatgttctctta     |
| GABRG2_MIP_7  | gtgtgcacatagagaggtgctCTTCAGCTCCCGATATCCGACGGTAGTGTcatgctaataaacagacaa |
| GABRG2_MIP_8  | catggtgggaaatctggaCTTCAGCTCCCGATATCCGACGGTAGTGTactgtgtacaaattctctgt   |
| GABRG2_MIP_9  | ggtgctgttaaattcaaacgtCTTCAGCTCCCGATATCCGACGGTAGTGTcattccaattctcagca   |
| GABRG2_MIP_10 | gttaggaagaaaacaacaaCTTCAGCTCCCGATATCCGACGGTAGTGTcacttctcagaaattcca    |
| GABRG2_MIP_11 | actcctccccttggagttcCTTCAGCTCCCGATATCCGACGGTAGTGTcatttaaaattgtgcaaat   |
| GABRG2_MIP_12 | gtgcaattgtaattggcactcagCTTCAGCTCCCGATATCCGACGGTAGTGTtatgcttcttcaatta  |
| GABRG2_MIP_13 | ccttggcctccagagtagctgCTTCAGCTCCCGATATCCGACGGTAGTGTgttgtgtgtgtgttt     |
| GABRG2_MIP_14 | cagaagcgaaggctgtagtCTTCAGCTCCCGATATCCGACGGTAGTGTgataaatccagcttgggc    |
| GABRG2_MIP_15 | ataccaccgaagtagtgaagacCTTCAGCTCCCGATATCCGACGGTAGTGTgagcttctctatctcagc |
| GABRG2_MIP_16 | gtgtgccactcaacagaCTTCAGCTCCCGATATCCGACGGTAGTGTataccaaaattcaactct      |
| GABRG2_MIP_17 | cctatcctgggtgtcttctgCTTCAGCTCCCGATATCCGACGGTAGTGTaaaaggtgtatgtgtt     |
| GABRG2_MIP_18 | caatgagtgctcaggagataCTTCAGCTCCCGATATCCGACGGTAGTGTatggacataaaaactctg   |
| GABRG2_MIP_19 | gtctcctatgtcacagcagatggCTTCAGCTCCCGATATCCGACGGTAGTGTcacagtgactcagttac |
| GABRG2_MIP_20 | gggagcgaattccgggcaatCTTCAGCTCCCGATATCCGACGGTAGTGTtatcttcttcttctgctg   |
| GABRG2_MIP_21 | caggctaaggctcagcagttCTTCAGCTCCCGATATCCGACGGTAGTGTattttgtcagcaaccgga   |
| GABRG2_MIP_22 | gtttatgagtagacatttaagcCTTCAGCTCCCGATATCCGACGGTAGTGTtctcttctctctaca    |
| GABRG2_MIP_23 | gggtttgtagacagaaaagagCTTCAGCTCCCGATATCCGACGGTAGTGTgcttaaatgctactcat   |
| GABRG2_MIP_24 | actgtgccagttttctgctgCTTCAGCTCCCGATATCCGACGGTAGTGTcttccctaccctgtcc     |
| GABRG2_MIP_25 | ccagacactcatagcctactCTTCAGCTCCCGATATCCGACGGTAGTGTaaggcagtgaggaaag     |
| GABRG2_MIP_26 | gagagatgctgttctaagtccacCTTCAGCTCCCGATATCCGACGGTAGTGTgactcctatgctcga   |
| GNAI1_MIP_1   | caacctcgtgaggacggcgaCTTCAGCTCCCGATATCCGACGGTAGTGTgactccccctgtcttggag  |
| GNAI1_MIP_2   | ggtcgatcatcttactcctctcCTTCAGCTCCCGATATCCGACGGTAGTGTaaaccggaggccg      |
| GNAI1_MIP_3   | caccaaattgctgttaagttaCTTCAGCTCCCGATATCCGACGGTAGTGTgtgtgtggagttgaa     |
| GNAI1_MIP_4   | caactccaacacacaaacacCTTCAGCTCCCGATATCCGACGGTAGTGTaaacagcaaatgtgtt     |
| GNAI1_MIP_5   | gttgaagatagacttggtagCTTCAGCTCCCGATATCCGACGGTAGTGTtttttccctttgtctca    |
| GNAI1_MIP_6   | ccactgcttattgtttacaCTTCAGCTCCCGATATCCGACGGTAGTGTtcttttaccatcaggt      |
| GNAI1_MIP_7   | gtggaaagatagtggtgtacaaCTTCAGCTCCCGATATCCGACGGTAGTGTgacatcccttttac     |
| GNAI1_MIP_8   | ccagctagcacaagagttgCTTCAGCTCCCGATATCCGACGGTAGTGTacttactatgctcagaatc   |
| GNAI1_MIP_9   | acattctgtacaacttaggataCTTCAGCTCCCGATATCCGACGGTAGTGTcccagagtagcagct    |
| GNAI1_MIP_10  | gagtgaactacaggaattgtCTTCAGCTCCCGATATCCGACGGTAGTGTggatgctttattggct     |
| GNAI1_MIP_11  | gttctgagaacatctgtttagCTTCAGCTCCCGATATCCGACGGTAGTGTtacctttttattctaa    |
| GNAI1_MIP_12  | ggttctagctgaagatgaagaCTTCAGCTCCCGATATCCGACGGTAGTGTgttaactcattctctc    |
| GNAI1_MIP_13  | gtcactcagtgctacagaCTTCAGCTCCCGATATCCGACGGTAGTGTcctgactttcaaatgtta     |
| GNAI1_MIP_14  | gaaaaaatcaaaaagagcccCTTCAGCTCCCGATATCCGACGGTAGTGTgattgtttttttttct     |
| GNAI1_MIP_15  | ccactgtttacatagctgCTTCAGCTCCCGATATCCGACGGTAGTGTgacaagttattccagga      |
| GNAI1_MIP_16  | actcacaatgtccacagatCTTCAGCTCCCGATATCCGACGGTAGTGTtaacttttgcatttatgt    |
| GNAI1_MIP_17  | ggtgtatattcttgtgtcCTTCAGCTCCCGATATCCGACGGTAGTGTaaaatgcattttaccatga    |
| SEMA3A_MIP_1  | ccttggccaggtttttctgCTTCAGCTCCCGATATCCGACGGTAGTGTgaggttctagagtaagt     |



|               |                                                                         |
|---------------|-------------------------------------------------------------------------|
| SEMA3A_MIP_2  | caggacataccccagggaacagCTTCAGCTTCCCGATATCCGACGGTAGTGTtagcatgacacctagccag |
| SEMA3A_MIP_3  | gggttaccttaagaagagtttgCTTCAGCTTCCCGATATCCGACGGTAGTGTtgcataagctctctgtac  |
| SEMA3A_MIP_4  | ggaagtcattgacacagagcaCTTCAGCTTCCCGATATCCGACGGTAGTGTtagagtgatgatcatatca  |
| SEMA3A_MIP_5  | attatgtgtgaggcacattttaCTTCAGCTTCCCGATATCCGACGGTAGTGTagaagcgcttgatctgt   |
| SEMA3A_MIP_6  | attctctctcagggtctgtggcCTTCAGCTTCCCGATATCCGACGGTAGTGTcagtcagtttcattctctg |
| SEMA3A_MIP_7  | gggttagagaatagtagcacatCTTCAGCTTCCCGATATCCGACGGTAGTGTtctgtctctgaatttc    |
| SEMA3A_MIP_8  | ccttattttcccttctagaaCTTCAGCTTCCCGATATCCGACGGTAGTGTtagcaggttgaagaatgaa   |
| SEMA3A_MIP_9  | atcttcaacctgctaagaccCTTCAGCTTCCCGATATCCGACGGTAGTGTgaagggaaaaataaggata   |
| SEMA3A_MIP_10 | ccgtaaatatcacaccggtgCTTCAGCTTCCCGATATCCGACGGTAGTGTataactagcaaacatttcat  |
| SEMA3A_MIP_11 | aaagcgtgtgctgagttgCTTCAGCTTCCCGATATCCGACGGTAGTGTtaagagaacaagagatttaa    |
| SEMA3A_MIP_12 | ggtcaattagaacaccagcCTTCAGCTTCCCGATATCCGACGGTAGTGTgaaacaccagaattaacaa    |
| SEMA3A_MIP_13 | cattatgtattaccattgaatCTTCAGCTTCCCGATATCCGACGGTAGTGTatggcagtgcttgatgta   |
| SEMA3A_MIP_14 | gtcccaacatctttgaaagaaaCTTCAGCTTCCCGATATCCGACGGTAGTGTaagacgtacaactgaact  |
| SEMA3A_MIP_15 | gttcttaagtagttcaattctCTTCAGCTTCCCGATATCCGACGGTAGTGTtaaaaggaagaccgat     |
| SEMA3A_MIP_16 | cactattggcgattgttcaCTTCAGCTTCCCGATATCCGACGGTAGTGTtccgaaaaaattttagc      |
| SEMA3A_MIP_17 | gaccgagtgatgcagaagatgCTTCAGCTTCCCGATATCCGACGGTAGTGTggaccttctgatgatgt    |
| SEMA3A_MIP_18 | cataattataaattataataaCTTCAGCTTCCCGATATCCGACGGTAGTGTctggatgacttctgtc     |
| SEMA3A_MIP_19 | gctatacatcacaccgctgCTTCAGCTTCCCGATATCCGACGGTAGTGTattttaaacacctaagctac   |
| SEMA3A_MIP_20 | gtgagaaagggtgtcttctgCTTCAGCTTCCCGATATCCGACGGTAGTGTtctaaatgtaagaactcag   |
| SEMA3A_MIP_21 | gaatggcaaaagtctgaacaaatCTTCAGCTTCCCGATATCCGACGGTAGTGTggtagttaaaaagtact  |
| SEMA3A_MIP_22 | gtaacttttaactccttaCTTCAGCTTCCCGATATCCGACGGTAGTGTgttcagactttgccattcc     |
| SEMA3A_MIP_23 | gtcattctgaaagaagggaacCTTCAGCTTCCCGATATCCGACGGTAGTGTacataaacactgacttct   |
| SEMA3A_MIP_24 | ggagggcacagaagtctgctCTTCAGCTTCCCGATATCCGACGGTAGTGTtaggaacttttaaacatg    |
| SEMA3A_MIP_25 | gtatacttctcatctcagCTTCAGCTTCCCGATATCCGACGGTAGTGTcaaaagctgtatgggaaaat    |
| SEMA3A_MIP_26 | ccgtgaaaatgcaatagatggagCTTCAGCTTCCCGATATCCGACGGTAGTGTaatggtattttatta    |
| SEMA3A_MIP_27 | cagctgcagttccagatgCTTCAGCTTCCCGATATCCGACGGTAGTGTtacacatggtacatgtcta     |
| SEMA3A_MIP_28 | ggggcgagactttgctatctCTTCAGCTTCCCGATATCCGACGGTAGTGTcataacatgaaacttgcac   |
| SEMA3A_MIP_29 | gtgagttctccagcttaaaaaCTTCAGCTTCCCGATATCCGACGGTAGTGTaagaacatacaactgcttt  |
| SEMA3A_MIP_30 | gaaaaacggcctgggaagagCTTCAGCTTCCCGATATCCGACGGTAGTGTacatgcaactcagactctc   |
| SEMA3A_MIP_31 | gcacattcttctgtaagacaaaCTTCAGCTTCCCGATATCCGACGGTAGTGTtttaaaaaagcagcgt    |
| SEMA3A_MIP_32 | cagactcactgtacgctgtCTTCAGCTTCCCGATATCCGACGGTAGTGTacaaatctgtccagcatg     |
| SEMA3A_MIP_33 | cacacaatctaagacagagaaCTTCAGCTTCCCGATATCCGACGGTAGTGTgaaacactttgtccca     |
| SEMA3A_MIP_34 | ccagaagagatgaatgcaagtCTTCAGCTTCCCGATATCCGACGGTAGTGTtgaactttcttacttca    |
| SEMA3A_MIP_35 | cgcttctcatcaaaaaggaaCTTCAGCTTCCCGATATCCGACGGTAGTGTtatctataacttgagatgc   |
| SEMA3A_MIP_36 | gctgtatgtggagcaaggCTTCAGCTTCCCGATATCCGACGGTAGTGTtctcacataataaccaatg     |
| SEMA3A_MIP_37 | ccatgctgcagacgctgagCTTCAGCTTCCCGATATCCGACGGTAGTGTaaataaaagaaaaataagat   |
| SEMA3A_MIP_38 | ggattgtctgttttctggCTTCAGCTTCCCGATATCCGACGGTAGTGTatgaaactgacctaataca     |
| ADAM22_MIP_1  | gtaagttagccgtcctctgtgctCTTCAGCTTCCCGATATCCGACGGTAGTGTgaggagctgagcgtct   |
| ADAM22_MIP_2  | caggctcccagacacagagcagCTTCAGCTTCCCGATATCCGACGGTAGTGTgcgcaactcgggaaatgg  |
| ADAM22_MIP_3  | cctcatctaccgctcgggctCTTCAGCTTCCCGATATCCGACGGTAGTGTggtcattattttcgctttt   |
| ADAM22_MIP_4  | gaagcggtttctctctctctCTTCAGCTTCCCGATATCCGACGGTAGTGTgaccgacgtctcacct      |
| ADAM22_MIP_5  | agttgggtcccagtcgagtcagCTTCAGCTTCCCGATATCCGACGGTAGTGTggcgacctcgggtgcc    |
| ADAM22_MIP_6  | gtgtgagttgcacttcttCTTCAGCTTCCCGATATCCGACGGTAGTGTgattagtagtgctgagtaa     |
| ADAM22_MIP_7  | aaggttatttatactcagccatCTTCAGCTTCCCGATATCCGACGGTAGTGTtctgacaaaagcaagtg   |
| ADAM22_MIP_8  | atttctacttgtgggaaaCTTCAGCTTCCCGATATCCGACGGTAGTGTcgtgttttcatctttggg      |
| ADAM22_MIP_9  | atcccaaaaatgtaaacacgaaCTTCAGCTTCCCGATATCCGACGGTAGTGTtcccacaagtaggaaa    |
| ADAM22_MIP_10 | acttcagtaagttcaaaaagtCTTCAGCTTCCCGATATCCGACGGTAGTGTtagctgattctctgtgtg   |
| ADAM22_MIP_11 | ggcatgtgacaatgcaacaCTTCAGCTTCCCGATATCCGACGGTAGTGTtccatccaatttaagtc      |
| ADAM22_MIP_12 | aaatgtttatgctgagagcttCTTCAGCTTCCCGATATCCGACGGTAGTGTggccatgcttaattatt    |
| ADAM22_MIP_13 | aaaaaataataggcatggccaCTTCAGCTTCCCGATATCCGACGGTAGTGTaagctctcagcataaaca   |
| ADAM22_MIP_14 | catctggtatgatgtcatatagCTTCAGCTTCCCGATATCCGACGGTAGTGTtttgcttaaggctgga    |
| ADAM22_MIP_15 | caaacagctggattgtaaacCTTCAGCTTCCCGATATCCGACGGTAGTGTcagatgtgggctaataatg   |
| ADAM22_MIP_16 | cagtggtgtgctgttattCTTCAGCTTCCCGATATCCGACGGTAGTGTagaactctgacaaatgcac     |
| ADAM22_MIP_17 | gtgcattgtcagattcttcaatCTTCAGCTTCCCGATATCCGACGGTAGTGTacacgacacaccactg    |
| ADAM22_MIP_18 | cctagggtaaaactggtagtCTTCAGCTTCCCGATATCCGACGGTAGTGTgtttccttctctgtgta     |
| ADAM22_MIP_19 | acacaggaaggaacagcacctCTTCAGCTTCCCGATATCCGACGGTAGTGTcagttttaccctaggca    |
| ADAM22_MIP_20 | gccctagaagattcttattccCTTCAGCTTCCCGATATCCGACGGTAGTGTgaagaccttcaactgtt    |
| ADAM22_MIP_21 | aacaagtgaaggtcttcaaaCTTCAGCTTCCCGATATCCGACGGTAGTGTaataagaactcttagggc    |
| ADAM22_MIP_22 | accctacgtgagttatgaaatCTTCAGCTTCCCGATATCCGACGGTAGTGTacacgctgattgttcat    |
| ADAM22_MIP_23 | gtcggcagggttccatagcCTTCAGCTTCCCGATATCCGACGGTAGTGTacatcattacagaagttac    |
| ADAM22_MIP_24 | agtaggtgtaacatctgtacaCTTCAGCTTCCCGATATCCGACGGTAGTGTgttgaactgtgaacagt    |
| ADAM22_MIP_25 | cattcacgctctcttctCTTCAGCTTCCCGATATCCGACGGTAGTGTcaccatactgatttgaata      |
| ADAM22_MIP_26 | gaaagttagcaagtggaagtCTTCAGCTTCCCGATATCCGACGGTAGTGTtctcagtgacaatttgg     |
| ADAM22_MIP_27 | gggtaatgactgggcaagtCTTCAGCTTCCCGATATCCGACGGTAGTGTaagcaactaaataaaaaat    |
| ADAM22_MIP_28 | gctgtgctgttctcttagCTTCAGCTTCCCGATATCCGACGGTAGTGTtcttaacaaggcatggtg      |

|               |                                                                        |
|---------------|------------------------------------------------------------------------|
| ADAM22_MIP_29 | cacatgctgttataaagtgaCTTCAGCTTCCCGATATCCGACGGTAGTGTagaagacaacagcacagc   |
| ADAM22_MIP_30 | accttctaaggtaataagtgtggCTTCAGCTTCCCGATATCCGACGGTAGTGTgagttgaaccagcta   |
| ADAM22_MIP_31 | gttgaaaaggcaggcaccacCTTCAGCTTCCCGATATCCGACGGTAGTGTatgtacatacagggcaagt  |
| ADAM22_MIP_32 | gtaattcagggtcattccaggCTTCAGCTTCCCGATATCCGACGGTAGTGTgttcacttttggttttcc  |
| ADAM22_MIP_33 | gaggaaaaccaaagtgaactCTTCAGCTTCCCGATATCCGACGGTAGTGTctggaaatgacctgaatt   |
| ADAM22_MIP_34 | gctgtaaaaagtcaaggtaaaCTTCAGCTTCCCGATATCCGACGGTAGTGTtttcaggaaagtgcacc   |
| ADAM22_MIP_35 | caacactctgctctcaaggCTTCAGCTTCCCGATATCCGACGGTAGTGTcccagccttaatgattaa    |
| ADAM22_MIP_36 | acttatgggaaaaagtggggCTTCAGCTTCCCGATATCCGACGGTAGTGTcaagttgattttgtcat    |
| ADAM22_MIP_37 | aatgaacaaaatcaactgtgCTTCAGCTTCCCGATATCCGACGGTAGTGTcccacttttcccataaga   |
| ADAM22_MIP_38 | cagcatgaaaggaaactgaaaCTTCAGCTTCCCGATATCCGACGGTAGTGTttgcactgcatttcattc  |
| ADAM22_MIP_39 | aaatgcagtcaaaaataaggcCTTCAGCTTCCCGATATCCGACGGTAGTGTcctttcatgctgttaca   |
| ADAM22_MIP_40 | gtcaggcggacttctcaaggCTTCAGCTTCCCGATATCCGACGGTAGTGTtcaatgggtatttgcctttc |
| ADAM22_MIP_41 | ggaaaagcaaataccattagcgaCTTCAGCTTCCCGATATCCGACGGTAGTGTgagaagtcgcctga    |
| ADAM22_MIP_42 | agggtggagactcagcccagCTTCAGCTTCCCGATATCCGACGGTAGTGTtagaaaattttttctgctc  |
| ADAM22_MIP_43 | ggcagaaaaaattttctcatcagCTTCAGCTTCCCGATATCCGACGGTAGTGTgctgagcttccacctc  |
| ADAM22_MIP_44 | gtcgagcaaggaagaacattCTTCAGCTTCCCGATATCCGACGGTAGTGTtatatttgggaaaagaagta |
| ADAM22_MIP_45 | caccatcgagttctcaagcCTTCAGCTTCCCGATATCCGACGGTAGTGTtaattgaaaacggaaggaa   |
| ADAM22_MIP_46 | cctgtgcttcttcaacttCTTCAGCTTCCCGATATCCGACGGTAGTGTgattcatttttgcctca      |
| ADAM22_MIP_47 | agacacctgttctaagcacaCTTCAGCTTCCCGATATCCGACGGTAGTGTggtcctgtctattctgt    |
| ADAM22_MIP_48 | ggtatcaactgtctgcaaaCTTCAGCTTCCCGATATCCGACGGTAGTGTgagagttgacttactcta    |
| ADAM22_MIP_49 | atcagaaccttccagtgtctCTTCAGCTTCCCGATATCCGACGGTAGTGTaaagttttcagagagcag   |
| ADAM22_MIP_50 | ggaataactcgtggggttaCTTCAGCTTCCCGATATCCGACGGTAGTGTacaataaagtttctgaaagg  |
| ADAM22_MIP_51 | ccagcactaaaatggtgccaCTTCAGCTTCCCGATATCCGACGGTAGTGTtattcaaccaatgatacaaa |
| ADAM22_MIP_52 | gactcatattagcattgttggaaCTTCAGCTTCCCGATATCCGACGGTAGTGTcctctgatgtccttcc  |
| ADAM22_MIP_53 | ggaaggacatcaagaggagCTTCAGCTTCCCGATATCCGACGGTAGTGTcaacaatgctaataatgagtc |
| ADAM22_MIP_54 | gtctgctttctgtcgactCTTCAGCTTCCCGATATCCGACGGTAGTGTtctgaaagtttatattgccc   |
| ADAM22_MIP_55 | aactagatgctgagttgtgcCTTCAGCTTCCCGATATCCGACGGTAGTGTaaacattcaagaagaagg   |
| ADAM22_MIP_56 | actcttgcaaggtagagcCTTCAGCTTCCCGATATCCGACGGTAGTGTtgggttacattttgaaaca    |
| ADAM22_MIP_57 | cgaggtgccattttcacagCTTCAGCTTCCCGATATCCGACGGTAGTGTtctgtgggagaagagcta    |
| ADAM22_MIP_58 | cctgtgcaaatagtgcaaaagCTTCAGCTTCCCGATATCCGACGGTAGTGTtagctctaaacctgtt    |
| ADAM22_MIP_59 | aaaagacggttagagctagaCTTCAGCTTCCCGATATCCGACGGTAGTGTttttgacactatttgaca   |
| ADAM22_MIP_60 | aaacactgaaggaccatacttCTTCAGCTTCCCGATATCCGACGGTAGTGTtctgtctgtattttcag   |
| ADAM22_MIP_61 | gtctctttgaacctgggttCTTCAGCTTCCCGATATCCGACGGTAGTGTccagtcacactacagtat    |
| ADAM22_MIP_62 | cgacaagtgcagggtatgCTTCAGCTTCCCGATATCCGACGGTAGTGTaattcatgttccaactct     |
| ADAM22_MIP_63 | gtcctcatcaggaagtggagcCTTCAGCTTCCCGATATCCGACGGTAGTGTtaggaacaaggaggaa    |
| ADAM22_MIP_64 | gtcttccagaaatacgaagacCTTCAGCTTCCCGATATCCGACGGTAGTGTtctcttttctgtgtg     |
| ADAM22_MIP_65 | cacaacgaaaagagcaaaattCTTCAGCTTCCCGATATCCGACGGTAGTGTtctgattgtcgaagagc   |
| DLGAP2_MIP_1  | cgacgcgcccgcctactctCTTCAGCTTCCCGATATCCGACGGTAGTGTgagcctactgcgccg       |
| DLGAP2_MIP_2  | gcccgtgctcaggtgctcagCTTCAGCTTCCCGATATCCGACGGTAGTGTacacgtgtgcgccagc     |
| DLGAP2_MIP_3  | cccggccaacctgtgaccCTTCAGCTTCCCGATATCCGACGGTAGTGTgtgctgatgatccgggtg     |
| DLGAP2_MIP_4  | gcgtgtcgtagtgcagctgaCTTCAGCTTCCCGATATCCGACGGTAGTGTgagctcctctgtactgc    |
| DLGAP2_MIP_5  | gctcttcaccaagtgcactcCTTCAGCTTCCCGATATCCGACGGTAGTGTtagtcgagaagcagctgc   |
| DLGAP2_MIP_6  | cacggagtgtaccaggtggcggCTTCAGCTTCCCGATATCCGACGGTAGTGTtctgtcctctgtctgt   |
| DLGAP2_MIP_7  | cgcccagctgctcaaccggCTTCAGCTTCCCGATATCCGACGGTAGTGTaccagcccaccgccaag     |
| DLGAP2_MIP_8  | gataggtgctgctgctcaggCTTCAGCTTCCCGATATCCGACGGTAGTGTcggagcactgacgtcg     |
| DLGAP2_MIP_9  | caagagctgctgaacctggaCTTCAGCTTCCCGATATCCGACGGTAGTGTaaacctccaaggaaca     |
| DLGAP2_MIP_10 | accaggagctgcctcaggaCTTCAGCTTCCCGATATCCGACGGTAGTGTgtagcctgcttacctg      |
| DLGAP2_MIP_11 | actgcatacatttagttgtcCTTCAGCTTCCCGATATCCGACGGTAGTGTaccaggaaccagacc      |
| DLGAP2_MIP_12 | gagttacattaagccatggggCTTCAGCTTCCCGATATCCGACGGTAGTGTgcccgttctcagtgaca   |
| DLGAP2_MIP_13 | acttctcattctctcagggaaCTTCAGCTTCCCGATATCCGACGGTAGTGTctccaagcgtctct      |
| DLGAP2_MIP_14 | cactgcctgcgactcctctCTTCAGCTTCCCGATATCCGACGGTAGTGTactccagcccaagacatc    |
| DLGAP2_MIP_15 | attccgctcccgaaccagaCTTCAGCTTCCCGATATCCGACGGTAGTGTgcccctgcagcgggtctca   |
| DLGAP2_MIP_16 | ggggtccagctgtgtccacaCTTCAGCTTCCCGATATCCGACGGTAGTGTactggaccggggagaa     |
| DLGAP2_MIP_17 | gatgtttccaacaaggagtcaCTTCAGCTTCCCGATATCCGACGGTAGTGTggggcatcacgtgtgc    |
| DLGAP2_MIP_18 | agggatccatggcctgagatCTTCAGCTTCCCGATATCCGACGGTAGTGTctgttgacctgatgggga   |
| DLGAP2_MIP_19 | cagtacaatgtactctcagcCTTCAGCTTCCCGATATCCGACGGTAGTGTgacacctctgacatcac    |
| DLGAP2_MIP_20 | accaggagcctaccaggaCTTCAGCTTCCCGATATCCGACGGTAGTGTcctgttgacttgggactttc   |
| DLGAP2_MIP_21 | gagatcagaggcttggaggctCTTCAGCTTCCCGATATCCGACGGTAGTGTctgttctgtctcagct    |
| DLGAP2_MIP_22 | cctgggtccaaggcggaggagCTTCAGCTTCCCGATATCCGACGGTAGTGTgcccctctacaactcca   |
| DLGAP2_MIP_23 | ggccttctgctggtccgcaCTTCAGCTTCCCGATATCCGACGGTAGTGTttttgcttattctaggct    |
| DLGAP2_MIP_24 | cctttttggatgtcatcgacCTTCAGCTTCCCGATATCCGACGGTAGTGTgtctccacactgtggct    |
| DLGAP2_MIP_25 | atgaagccacagtgtgagaccCTTCAGCTTCCCGATATCCGACGGTAGTGTtgcgatgaactcaaaa    |
| DLGAP2_MIP_26 | actcagcccctctgacacgCTTCAGCTTCCCGATATCCGACGGTAGTGTcccattgttcagttcaaaa   |
| DLGAP2_MIP_27 | gcttctcatctccaactgaccCTTCAGCTTCCCGATATCCGACGGTAGTGTaaactgatggcctgtt    |
| DLGAP2_MIP_28 | ccttcagttcgctcatcttCTTCAGCTTCCCGATATCCGACGGTAGTGTaccatctgtcttcttc      |

|                |                                                                         |
|----------------|-------------------------------------------------------------------------|
| DLGAP2_MIP_29  | gtggtgatgtggcctgggaacCTTCAGTTCCTCCGATATCCGACGGTAGTGTgggtccgatagtcttctct |
| DLGAP2_MIP_30  | gatggctcgtggttttgaagctgCTTCAGTTCCTCCGATATCCGACGGTAGTGTagggctcttcagcta   |
| DLGAP2_MIP_31  | acggagacatctcccagtctCTTCAGTTCCTCCGATATCCGACGGTAGTGTgaagcctgagcttctact   |
| DLGAP2_MIP_32  | ctcccttggattcaagtgaCTTCAGTTCCTCCGATATCCGACGGTAGTGTtagtgagagagagggcg     |
| DLGAP2_MIP_33  | gtttattggcttggcaacaCTTCAGTTCCTCCGATATCCGACGGTAGTGTctgctttgtgttaattgac   |
| DLGAP2_MIP_34  | gctggaattctgggacatgagCTTCAGTTCCTCCGATATCCGACGGTAGTGTcagatgggaactctttgac |
| DLGAP2_MIP_35  | gtcagcatgaagttcgacgagctCTTCAGTTCCTCCGATATCCGACGGTAGTGTgtgccccagggagact  |
| DLGAP2_MIP_36  | caatggagagctgacgatgctCTTCAGTTCCTCCGATATCCGACGGTAGTGTcagtgagaaaagggggtt  |
| DLGAP2_MIP_37  | agagaaaaatccctggacctcccCTTCAGTTCCTCCGATATCCGACGGTAGTGTgagctcgcgagctgct  |
| DLGAP2_MIP_38  | ggattggaggcgggaccttctCTTCAGTTCCTCCGATATCCGACGGTAGTGTggaattctcgggaagga   |
| DLGAP2_MIP_39  | ccctcgtccttccgcttctCTTCAGTTCCTCCGATATCCGACGGTAGTGTcggagcgcctcatggccg    |
| SMARCA2_MIP_1  | catccccaggttccgccacaCTTCAGTTCCTCCGATATCCGACGGTAGTGTactgactggcagagacag   |
| SMARCA2_MIP_2  | cctgctcctggactaggcccCTTCAGTTCCTCCGATATCCGACGGTAGTGTactcttacctatgctttg   |
| SMARCA2_MIP_3  | atcatgcaaatctttgcttctaCTTCAGTTCCTCCGATATCCGACGGTAGTGTccacaggaaggcatgc   |
| SMARCA2_MIP_4  | ctccccagagccaatggaCTTCAGTTCCTCCGATATCCGACGGTAGTGTtagaggtgtctaactaatgt   |
| SMARCA2_MIP_5  | cccatgctgggtgaggtggCTTCAGTTCCTCCGATATCCGACGGTAGTGTtagacattcttggaaatt    |
| SMARCA2_MIP_6  | cacctcagatgccaccaagccCTTCAGTTCCTCCGATATCCGACGGTAGTGTtctttcaggggtgtcaggg |
| SMARCA2_MIP_7  | agttgggctcctccagacataCTTCAGTTCCTCCGATATCCGACGGTAGTGTctaaaatctgagctcga   |
| SMARCA2_MIP_8  | aaggacgttctgctgcttctCTTCAGTTCCTCCGATATCCGACGGTAGTGTgcccacagaggtccct     |
| SMARCA2_MIP_9  | ggactgcaagctgcagcttctCTTCAGTTCCTCCGATATCCGACGGTAGTGTgctcgtctgtgtgtgc    |
| SMARCA2_MIP_10 | caactgggatacaaaagactctcCTTCAGTTCCTCCGATATCCGACGGTAGTGTgacagcaacagcagcc  |
| SMARCA2_MIP_11 | cgcagtgcccgggcccctcagCTTCAGTTCCTCCGATATCCGACGGTAGTGTcctatgctcttcttccg   |
| SMARCA2_MIP_12 | ccgcgggcggctgcccggctcggCTTCAGTTCCTCCGATATCCGACGGTAGTGTaatttccaggggtcc   |
| SMARCA2_MIP_13 | cctgctccttggttggcaaaaCTTCAGTTCCTCCGATATCCGACGGTAGTGTatccagaaaaccgaaggc  |
| SMARCA2_MIP_14 | cggttactcaatttccagcctCTTCAGTTCCTCCGATATCCGACGGTAGTGTcctttccccattttattgt |
| SMARCA2_MIP_15 | cggttgccttggcttctaaatCTTCAGTTCCTCCGATATCCGACGGTAGTGTattgaatagactaaaggca |
| SMARCA2_MIP_16 | catgaccgagaagctggagaagCTTCAGTTCCTCCGATATCCGACGGTAGTGTtctaactgctctctctt  |
| SMARCA2_MIP_17 | gagcttctcagagcttggCTTCAGTTCCTCCGATATCCGACGGTAGTGTattttagaattcattggac    |
| SMARCA2_MIP_18 | catgccaactgaaagagagCTTCAGTTCCTCCGATATCCGACGGTAGTGTtcttttccctttcttttgg   |
| SMARCA2_MIP_19 | cggccacagaccgatgatcttCTTCAGTTCCTCCGATATCCGACGGTAGTGTtctgaggaggttctct    |
| SMARCA2_MIP_20 | gtttgggagcacaagcaagcCTTCAGTTCCTCCGATATCCGACGGTAGTGTatcctgctcttcttcttca  |
| SMARCA2_MIP_21 | cagattggctacatactcatgCTTCAGTTCCTCCGATATCCGACGGTAGTGTaaaaacttatccctgcc   |
| SMARCA2_MIP_22 | gtctgtccatactggcagCTTCAGTTCCTCCGATATCCGACGGTAGTGTgtgtacttataacattcga    |
| SMARCA2_MIP_23 | acaatgcaatgttataagtaacCTTCAGTTCCTCCGATATCCGACGGTAGTGTgctgcccaggtatggc   |
| SMARCA2_MIP_24 | aagcaagtcaagtgagcctCTTCAGTTCCTCCGATATCCGACGGTAGTGTtctaacatgaaaccgtgac   |
| SMARCA2_MIP_25 | ggtcgaacagaacctgccCTTCAGTTCCTCCGATATCCGACGGTAGTGTagttttagtttcagatcgt    |
| SMARCA2_MIP_26 | aggaaagaaattcttctgaatgCTTCAGTTCCTCCGATATCCGACGGTAGTGTcctcttctcactctttt  |
| SMARCA2_MIP_27 | ggaaaaagagtggagaagaggCTTCAGTTCCTCCGATATCCGACGGTAGTGTcattcaggaagaatttctt |
| SMARCA2_MIP_28 | ccaatagcgaagaagtcttCTTCAGTTCCTCCGATATCCGACGGTAGTGTgtcttttcagaaaatgtca   |
| SMARCA2_MIP_29 | cggtttctgctactggacCTTCAGTTCCTCCGATATCCGACGGTAGTGTaaaaaaaattcattaagca    |
| SMARCA2_MIP_30 | gtctgccctctaattaatggCTTCAGTTCCTCCGATATCCGACGGTAGTGTtctccacttttcttctt    |
| SMARCA2_MIP_31 | gtttctccacctctccgagaCTTCAGTTCCTCCGATATCCGACGGTAGTGTtagcccttagtcaacatgtg |
| SMARCA2_MIP_32 | atggggttggaaagaccatCTTCAGTTCCTCCGATATCCGACGGTAGTGTgggtgtattaggaatt      |
| SMARCA2_MIP_33 | catcggctaagattccgttctCTTCAGTTCCTCCGATATCCGACGGTAGTGTacgatgactgtggaataat |
| SMARCA2_MIP_34 | aaaagcaaaaaatagacctCTTCAGTTCCTCCGATATCCGACGGTAGTGTtttttctgtgttttttt     |
| SMARCA2_MIP_35 | aaaaaaaaacaagaaaaaaCTTCAGTTCCTCCGATATCCGACGGTAGTGTagggtctatttttgccttt   |
| SMARCA2_MIP_36 | cattctgcaaggtatgttttCTTCAGTTCCTCCGATATCCGACGGTAGTGTgatcatgcatgtattttt   |
| SMARCA2_MIP_37 | caagaggacattgaattgcccCTTCAGTTCCTCCGATATCCGACGGTAGTGTtccaattacactcagact  |
| SMARCA2_MIP_38 | actatggccccccagaaggaCTTCAGTTCCTCCGATATCCGACGGTAGTGTgtattttcccttgccttac  |
| SMARCA2_MIP_39 | agtgtcaagacctgagtcagcCTTCAGTTCCTCCGATATCCGACGGTAGTGTaccattgttcaaatgtgc  |
| SMARCA2_MIP_40 | gccctaaagctgagaacattaCTTCAGTTCCTCCGATATCCGACGGTAGTGTtctcccaacaatttttaa  |
| SMARCA2_MIP_41 | cccgaaaaagtattgttcacCTTCAGTTCCTCCGATATCCGACGGTAGTGTcaaatcataataaagcctct |
| SMARCA2_MIP_42 | ggtcttaacacctatgtagacCTTCAGTTCCTCCGATATCCGACGGTAGTGTcaatttcagaggcaggt   |
| SMARCA2_MIP_43 | gaaagataagaaggtacgttgcCTTCAGTTCCTCCGATATCCGACGGTAGTGTctgcttctgctacttac  |
| SMARCA2_MIP_44 | atccccctggctgcatatggcCTTCAGTTCCTCCGATATCCGACGGTAGTGTcagcattagcagggatgc  |
| SMARCA2_MIP_45 | gtttgagcctgattgtgtaCTTCAGTTCCTCCGATATCCGACGGTAGTGTatttttcccttccactg     |
| SMARCA2_MIP_46 | cagtggaaagggaaaaatagaaCTTCAGTTCCTCCGATATCCGACGGTAGTGTcaaatcaggtcctcaaac |
| SMARCA2_MIP_47 | gtgttggccttacataaacCTTCAGTTCCTCCGATATCCGACGGTAGTGTtaataataattatttttaa   |
| SMARCA2_MIP_48 | gattttaaaaaatgtaattatCTTCAGTTCCTCCGATATCCGACGGTAGTGTgagtttatgaaaggcaac  |
| SMARCA2_MIP_49 | catctctcatgacctatggCTTCAGTTCCTCCGATATCCGACGGTAGTGTtcttctgtttttgctattt   |
| SMARCA2_MIP_50 | catctggcagaaaagcagcaCTTCAGTTCCTCCGATATCCGACGGTAGTGTtaagtcccattatcccttc  |
| SMARCA2_MIP_51 | gcttaaatcttcagcagctCTTCAGTTCCTCCGATATCCGACGGTAGTGTttggcaaatattttctg     |
| SMARCA2_MIP_52 | caggccaccagctctgtgctCTTCAGTTCCTCCGATATCCGACGGTAGTGTaatgaaactgatcatctt   |
| SMARCA2_MIP_53 | caaaatacaagctgaactggaCTTCAGTTCCTCCGATATCCGACGGTAGTGTatagcatattgaccccc   |
| SMARCA2_MIP_54 | gttcaggtacagagcctgactCTTCAGTTCCTCCGATATCCGACGGTAGTGTcaagatggcctcagga    |

|                |                                                                        |
|----------------|------------------------------------------------------------------------|
| SMARCA2_MIP_55 | ccctttgttaaaaaactctggCTTCAGCTTCCCGATATCCGACGGTAGTGTcaagccacgagcggag    |
| SMARCA2_MIP_56 | gctttatacctctgcccttCTTCAGCTTCCCGATATCCGACGGTAGTGTaaactactctgttttaacc   |
| SMARCA2_MIP_57 | gatttaaccagtgagcactCTTCAGCTTCCCGATATCCGACGGTAGTGTaagcatttgttcatgat     |
| SMARCA2_MIP_58 | gtagaaaggctcacctgtgaCTTCAGCTTCCCGATATCCGACGGTAGTGTgacctcttattaatgtct   |
| SMARCA2_MIP_59 | cctcctcattaaaggggcttCTTCAGCTTCCCGATATCCGACGGTAGTGTgtagggcgtcactgtag    |
| SMARCA2_MIP_60 | gagaaaccaggggcttagagcCTTCAGCTTCCCGATATCCGACGGTAGTGTaatattggggaggggttc  |
| SMARCA2_MIP_61 | ctaagaagagaagaggccctCTTCAGCTTCCCGATATCCGACGGTAGTGTctcctttgttccaacgaa   |
| SMARCA2_MIP_62 | caatttctctcttttctgCTTCAGCTTCCCGATATCCGACGGTAGTGTttatcacgatcatgatga     |
| SMARCA2_MIP_63 | gttaagtgtgacttaggttCTTCAGCTTCCCGATATCCGACGGTAGTGTaaactgacaaagcagatg    |
| SMARCA2_MIP_64 | ccctatctctaaatacagctatccCTTCAGCTTCCCGATATCCGACGGTAGTGTggggacgagaaccag  |
| SMARCA2_MIP_65 | ccctatctctaaatacaggtatccCTTCAGCTTCCCGATATCCGACGGTAGTGTggggacgagaaccag  |
| SMARCA2_MIP_66 | cggtagagtagaagaacactagCTTCAGCTTCCCGATATCCGACGGTAGTGTatgattcaatctgttc   |
| SMARCA2_MIP_67 | ggaagccagtggtattcaaaaCTTCAGCTTCCCGATATCCGACGGTAGTGTtctcctcagtaattgtgat |
| SMARCA2_MIP_68 | catagtattctgtaattcttctcCTTCAGCTTCCCGATATCCGACGGTAGTGTggcggtcagctccaa   |
| SMARCA2_MIP_69 | cagacgttcaactggaggggaCTTCAGCTTCCCGATATCCGACGGTAGTGTtgcgtgaatttctcctcc  |
| SMARCA2_MIP_70 | acatccttccaggtgcctaCTTCAGCTTCCCGATATCCGACGGTAGTGTtagaaaatgaaatattct    |
| SMARCA2_MIP_71 | aagatgaagaagagtcagatcCTTCAGCTTCCCGATATCCGACGGTAGTGTacagatgcccccttgacc  |
| SMARCA2_MIP_72 | attgcttcatctcactctcCTTCAGCTTCCCGATATCCGACGGTAGTGTtctaaagtcttctgtga     |
| SMARCA2_MIP_73 | gccaacctgtagtgagcgaCTTCAGCTTCCCGATATCCGACGGTAGTGTgattactcactgtgtctat   |
| SMARCA2_MIP_74 | cctcgatttggcctttcttctgCTTCAGCTTCCCGATATCCGACGGTAGTGTggggacgagaaccag    |
| SMARCA2_MIP_75 | gtctcatttctaccagtgagCTTCAGCTTCCCGATATCCGACGGTAGTGTtcttcatgtgatgtact    |
| SMARCA2_MIP_76 | atgaagtaacatcacatgcaagCTTCAGCTTCCCGATATCCGACGGTAGTGTactcactgggtagaatg  |
| SLC1A1_MIP_1   | ggcgatcgcgaccctcaagCTTCAGCTTCCCGATATCCGACGGTAGTGTgcacaatagcggcgaca     |
| SLC1A1_MIP_2   | gtcggctattgtcgctggCTTCAGCTTCCCGATATCCGACGGTAGTGTagggtcgcgcatcggcca     |
| SLC1A1_MIP_3   | aaattctaagcggatgctgaCTTCAGCTTCCCGATATCCGACGGTAGTGTaggagaactcaaatatgtt  |
| SLC1A1_MIP_4   | agttgagaggttctgtgtCTTCAGCTTCCCGATATCCGACGGTAGTGTatggactaatagagaaca     |
| SLC1A1_MIP_5   | gtattattctgtaccactctcaCTTCAGCTTCCCGATATCCGACGGTAGTGTctgaggattaatcggc   |
| SLC1A1_MIP_6   | gtcagcaaacactgaaggCTTCAGCTTCCCGATATCCGACGGTAGTGTgaaaaaatcaccattacat    |
| SLC1A1_MIP_7   | catcaggtgagtttctccacaCTTCAGCTTCCCGATATCCGACGGTAGTGTgacgctgttcttggcca   |
| SLC1A1_MIP_8   | caggggtgctccttctcctCTTCAGCTTCCCGATATCCGACGGTAGTGTattcaatacagtaaacgca   |
| SLC1A1_MIP_9   | acttctacccttctccatCTTCAGCTTCCCGATATCCGACGGTAGTGTtattaggtatgacaaaacaa   |
| SLC1A1_MIP_10  | aaggcagtattgttagggcCTTCAGCTTCCCGATATCCGACGGTAGTGTcagcagaaaaaacattt     |
| SLC1A1_MIP_11  | acagctgtcatgacaactcCTTCAGCTTCCCGATATCCGACGGTAGTGTtctcaaaagcttaaaaaaa   |
| SLC1A1_MIP_12  | aaggactcttctcatgttcatCTTCAGCTTCCCGATATCCGACGGTAGTGTtgcattctgtgaatga    |
| SLC1A1_MIP_13  | attggaaaaatgggagaaaaggCTTCAGCTTCCCGATATCCGACGGTAGTGTtctgtcatcaaatgttt  |
| SLC1A1_MIP_14  | acaagtccaagacaaggcaaaCTTCAGCTTCCCGATATCCGACGGTAGTGTaggggaagcaaatgaca   |
| SLC1A1_MIP_15  | cctttacatggccacagctctCTTCAGCTTCCCGATATCCGACGGTAGTGTgagaagcactgtgatcg   |
| SLC1A1_MIP_16  | gatcttccagcaatcaggaacaaCTTCAGCTTCCCGATATCCGACGGTAGTGTtctctcagcggcatcc  |
| SLC1A1_MIP_17  | attgcatgggaatggcacaCTTCAGCTTCCCGATATCCGACGGTAGTGTaggataagtgtagggagg    |
| SLC1A1_MIP_18  | ggaaagggtcttctgtctgCTTCAGCTTCCCGATATCCGACGGTAGTGTgctgtttgtaaaagtggg    |
| SLC1A1_MIP_19  | caacaatcaacatggatgggaCTTCAGCTTCCCGATATCCGACGGTAGTGTgacattctagacataagt  |
| SLC1A1_MIP_20  | atccttctgtccactgttctCTTCAGCTTCCCGATATCCGACGGTAGTGTgatgtgatgatctgccc    |
| SLC1A1_MIP_21  | gtgatgaattcttctgtatctCTTCAGCTTCCCGATATCCGACGGTAGTGTgacctggacttgggca    |
| SLC1A1_MIP_22  | gaggatgtcacctgatcattCTTCAGCTTCCCGATATCCGACGGTAGTGTgctaaactcttctctgct   |
| SLC1A1_MIP_23  | cccacggcactcagcacaatCTTCAGCTTCCCGATATCCGACGGTAGTGTagaatgatcacagactcgag |
| SLC1A1_MIP_24  | aacattgtgaatcccttgccttCTTCAGCTTCCCGATATCCGACGGTAGTGTtctccctctctccc     |
| SLC1A1_MIP_25  | acttcagatgaaacatcatctgCTTCAGCTTCCCGATATCCGACGGTAGTGTgaggctgggtgatga    |
| SLC1A1_MIP_26  | actaatggcgaagtgtacattCTTCAGCTTCCCGATATCCGACGGTAGTGTtagacaagtctgacacca  |
| SH3GL2_MIP_1   | gtggccttccggcggcagcCTTCAGCTTCCCGATATCCGACGGTAGTGTccggcagcgccctctgc     |
| SH3GL2_MIP_2   | gcaggaggccgctgctggcCTTCAGCTTCCCGATATCCGACGGTAGTGTctgcccggcggcggcagc    |
| SH3GL2_MIP_3   | gagatggaagggttaagcctCTTCAGCTTCCCGATATCCGACGGTAGTGTaagtcttaaaattctaac   |
| SH3GL2_MIP_4   | agtcacatctagcttggcttCTTCAGCTTCCCGATATCCGACGGTAGTGTgatttctcagagaccag    |
| SH3GL2_MIP_5   | catcttataatgtaaaaggaCTTCAGCTTCCCGATATCCGACGGTAGTGTtctaaagctcatcttttg   |
| SH3GL2_MIP_6   | gttttgggtgagctgtatataCTTCAGCTTCCCGATATCCGACGGTAGTGTctgattgggtgaaag     |
| SH3GL2_MIP_7   | attggaagagagcttggagatCTTCAGCTTCCCGATATCCGACGGTAGTGTtctctctctcactt      |
| SH3GL2_MIP_8   | gcgctctgctgaggatagCTTCAGCTTCCCGATATCCGACGGTAGTGTctacagaatttctaccagc    |
| SH3GL2_MIP_9   | cagaactcattgacctcttCTTCAGCTTCCCGATATCCGACGGTAGTGTgagatgacatttctctt     |
| SH3GL2_MIP_10  | gtccaaagagtcttgcactcCTTCAGCTTCCCGATATCCGACGGTAGTGTaaaaggctcactctgt     |
| SH3GL2_MIP_11  | agtcaaggaaattgctgagctCTTCAGCTTCCCGATATCCGACGGTAGTGTcctgacctgacttttg    |
| SH3GL2_MIP_12  | caaatctctagagctgacgCTTCAGCTTCCCGATATCCGACGGTAGTGTaagggttatggccttta     |
| SH3GL2_MIP_13  | gtattctacagttccctgactCTTCAGCTTCCCGATATCCGACGGTAGTGTggcatgatttccatca    |
| SH3GL2_MIP_14  | gatctggactgctgtgtgCTTCAGCTTCCCGATATCCGACGGTAGTGTgacgttgtctccaaatg      |
| SH3GL2_MIP_15  | acaggcactccaaacctcaCTTCAGCTTCCCGATATCCGACGGTAGTGTaccacttttcttactg      |
| SH3GL2_MIP_16  | gggctgagtactgtctcagttCTTCAGCTTCCCGATATCCGACGGTAGTGTgaccagattggcacttc   |
| SH3GL2_MIP_17  | attgatgagaactggtataggCTTCAGCTTCCCGATATCCGACGGTAGTGTtctctctgctctact     |

|               |                                                                         |
|---------------|-------------------------------------------------------------------------|
| SH3GL2_MIP_18 | ggttagtgtgatgatcgCTTCAGCTTCCCGATATCCGACGGTAGTGTggccaagaggaggcgag        |
| STXBP1_MIP_1  | cagcgcccaggcctccgagcggCTTCAGCTTCCCGATATCCGACGGTAGTGTccggagagctcgcgagc   |
| STXBP1_MIP_2  | gctgcgcgagctccccggctcCTTCAGCTTCCCGATATCCGACGGTAGTGTtccggagcctggcgctg    |
| STXBP1_MIP_3  | gaaaaatcagaaggggatggaCTTCAGCTTCCCGATATCCGACGGTAGTGTtaattctctctctctct    |
| STXBP1_MIP_4  | aaagagagagagagagagaaatCTTCAGCTTCCCGATATCCGACGGTAGTGTactccatcccctctga    |
| STXBP1_MIP_5  | cacttgagcagtgctggagcctCTTCAGCTTCCCGATATCCGACGGTAGTGTgaagccatacagctgtt   |
| STXBP1_MIP_6  | cgatgggcttcatggactctgCTTCAGCTTCCCGATATCCGACGGTAGTGTcactgctcaagtgcagag   |
| STXBP1_MIP_7  | ccagaggaggactctggctaCTTCAGCTTCCCGATATCCGACGGTAGTGTccatcatgtttcttattca   |
| STXBP1_MIP_8  | acagtgaataagaaaacatgatggCTTCAGCTTCCCGATATCCGACGGTAGTGTtagccagagctctct   |
| STXBP1_MIP_9  | ctgtccccagtcctcagggcCTTCAGCTTCCCGATATCCGACGGTAGTGTggattcaggtccctctttt   |
| STXBP1_MIP_10 | aaaagagggaacctgaatccaattCTTCAGCTTCCCGATATCCGACGGTAGTGTgtagggactggggacag |
| STXBP1_MIP_11 | cctgagtagggggtgcaagCTTCAGCTTCCCGATATCCGACGGTAGTGTactgtctttgtcactctg     |
| STXBP1_MIP_12 | caagtatgacaaaagacagttggcCTTCAGCTTCCCGATATCCGACGGTAGTGTgacccccactcagg    |
| STXBP1_MIP_13 | gtgccaccctgaaggagctacCTTCAGCTTCCCGATATCCGACGGTAGTGTtaatacttttctctctcc   |
| STXBP1_MIP_14 | ggcgctccagataggattctcCTTCAGCTTCCCGATATCCGACGGTAGTGTcaggccagctctcact     |
| STXBP1_MIP_15 | gttctcttcaaggaccgagcCTTCAGCTTCCCGATATCCGACGGTAGTGTctgacccccctttg        |
| STXBP1_MIP_16 | acaagagggggtgacagagcaCTTCAGCTTCCCGATATCCGACGGTAGTGTggtccttgtaaagagaa    |
| STXBP1_MIP_17 | gcctatgaaaatgatgatacaCTTCAGCTTCCCGATATCCGACGGTAGTGTgcatctccctgttttcc    |
| STXBP1_MIP_18 | gcctgaaaagtcaattcatggCTTCAGCTTCCCGATATCCGACGGTAGTGTcaaaccaaaaaaccggttc  |
| STXBP1_MIP_19 | cagaggtgtccagtaagagccCTTCAGCTTCCCGATATCCGACGGTAGTGTcagtcactccactgag     |
| STXBP1_MIP_20 | gtgcttggcgcagtgctaCTTCAGCTTCCCGATATCCGACGGTAGTGTccaagaaaacgaattcacac    |
| STXBP1_MIP_21 | gcttctctctaagagcaggcCTTCAGCTTCCCGATATCCGACGGTAGTGTacttagctcctctttta     |
| STXBP1_MIP_22 | gaagataaaaggaggcagctaaCTTCAGCTTCCCGATATCCGACGGTAGTGTtccctgctcttagagag   |
| STXBP1_MIP_23 | cagctgcaaaaagacttctcaaCTTCAGCTTCCCGATATCCGACGGTAGTGTgctttctcttccctta    |
| STXBP1_MIP_24 | cactctaaggccctgatgtCTTCAGCTTCCCGATATCCGACGGTAGTGTactcaattattcaaacagat   |
| STXBP1_MIP_25 | gttttggccagcctattacCTTCAGCTTCCCGATATCCGACGGTAGTGTcaaacctgttggctttt      |
| STXBP1_MIP_26 | ggaaaaagcacaacagtttgaCTTCAGCTTCCCGATATCCGACGGTAGTGTaaataggcctggcaaaa    |
| STXBP1_MIP_27 | gcatcatcttctctacatctCTTCAGCTTCCCGATATCCGACGGTAGTGTgccaatgagggtgtgtt     |
| STXBP1_MIP_28 | gacattggcactcagagaatCTTCAGCTTCCCGATATCCGACGGTAGTGTtctgtttctctcttct      |
| STXBP1_MIP_29 | atgtaagagccagctcagctCTTCAGCTTCCCGATATCCGACGGTAGTGTatccgggttcttgtgcc     |
| STXBP1_MIP_30 | cgaggtgagccatgttggatCTTCAGCTTCCCGATATCCGACGGTAGTGTtcttgcactagcagtg      |
| STXBP1_MIP_31 | gttagtctggggcacagggcCTTCAGCTTCCCGATATCCGACGGTAGTGTtcttaacctggtgtgtg     |
| STXBP1_MIP_32 | ccatgatgtccttgataatcggCTTCAGCTTCCCGATATCCGACGGTAGTGTcaaatcctcaagtgagg   |
| STXBP1_MIP_33 | gacagaggggagccagctctCTTCAGCTTCCCGATATCCGACGGTAGTGTaatctgtctcttctctc     |
| STXBP1_MIP_34 | ggaaaagagacagatattagctCTTCAGCTTCCCGATATCCGACGGTAGTGTggtccctctgtcctt     |
| STXBP1_MIP_35 | atgagatgcgctgcctacCTTCAGCTTCCCGATATCCGACGGTAGTGTaactgactgacattctctt     |
| STXBP1_MIP_36 | gctcacaccccaaggatgaaaCTTCAGCTTCCCGATATCCGACGGTAGTGTcaaaagcgtggaatggag   |
| STXBP1_MIP_37 | agagcaaaagaaaagtaaaaCTTCAGCTTCCCGATATCCGACGGTAGTGTggcctctgttctccca      |
| STXBP1_MIP_38 | gataccctagaggactccctCTTCAGCTTCCCGATATCCGACGGTAGTGTagaataaagaaaagagtg    |
| STXBP1_MIP_39 | caaaacacgccccatcccacCTTCAGCTTCCCGATATCCGACGGTAGTGTcaagctcactgtcttct     |
| STXBP1_MIP_40 | gagcttcccagttctgttctcCTTCAGCTTCCCGATATCCGACGGTAGTGTtttggaggggcactt      |
| SPTAN1_MIP_1  | gtcagaagctggaagattcctCTTCAGCTTCCCGATATCCGACGGTAGTGTgacattttgatttcag     |
| SPTAN1_MIP_2  | gttagaggtccttgaagcggCTTCAGCTTCCCGATATCCGACGGTAGTGTggttgggtctttata       |
| SPTAN1_MIP_3  | aatcagacgaggaaagtactCTTCAGCTTCCCGATATCCGACGGTAGTGTggagaatggatcacagga    |
| SPTAN1_MIP_4  | catctgaaaccatacgggtgagCTTCAGCTTCCCGATATCCGACGGTAGTGTactcaaggtccgcaaa    |
| SPTAN1_MIP_5  | aaatgcccttctgatcatcCTTCAGCTTCCCGATATCCGACGGTAGTGTttaaagctggaaaagtc      |
| SPTAN1_MIP_6  | gtgaggactgtgagctggCTTCAGCTTCCCGATATCCGACGGTAGTGTaaactctgattgaaacttc     |
| SPTAN1_MIP_7  | cgtaagtactgcaccaactctgCTTCAGCTTCCCGATATCCGACGGTAGTGTgtgctcaactggctc     |
| SPTAN1_MIP_8  | gagttaatgaagtgaaccagtttCTTCAGCTTCCCGATATCCGACGGTAGTGTgctcttattggctct    |
| SPTAN1_MIP_9  | catgagcagcatatctgttCTTCAGCTTCCCGATATCCGACGGTAGTGTgaccaatcatcaaaattta    |
| SPTAN1_MIP_10 | ctcttggggcagcagaagtCTTCAGCTTCCCGATATCCGACGGTAGTGTtacaatccagctctct       |
| SPTAN1_MIP_11 | gccaggctgactgactcatcCTTCAGCTTCCCGATATCCGACGGTAGTGTtcaactccccccag        |
| SPTAN1_MIP_12 | ggtctggagagagatcttctgCTTCAGCTTCCCGATATCCGACGGTAGTGTactggtccttctgtctg    |
| SPTAN1_MIP_13 | ccgaagcagagcctgaacacCTTCAGCTTCCCGATATCCGACGGTAGTGTgcttggactagaatgaa     |
| SPTAN1_MIP_14 | gattacaactgggagcagatCTTCAGCTTCCCGATATCCGACGGTAGTGTgtaccaaggtcaggaga     |
| SPTAN1_MIP_15 | gttctctcgttacttgaCTTCAGCTTCCCGATATCCGACGGTAGTGTtattctcgttcaaaaaag       |
| SPTAN1_MIP_16 | cctgctagatagacccaagaCTTCAGCTTCCCGATATCCGACGGTAGTGTgtcttcttggtttcc       |
| SPTAN1_MIP_17 | cacatcactggcaagctcatctCTTCAGCTTCCCGATATCCGACGGTAGTGTgccaactatagcctcac   |
| SPTAN1_MIP_18 | agaagagaaatggagcttttgaCTTCAGCTTCCCGATATCCGACGGTAGTGTggccttgttttctctc    |
| SPTAN1_MIP_19 | caggagaaaaaaacaaagccaCTTCAGCTTCCCGATATCCGACGGTAGTGTcaaaagctccattctct    |
| SPTAN1_MIP_20 | caggtggacaactggatgagcaCTTCAGCTTCCCGATATCCGACGGTAGTGTcctatgtcctatgccc    |
| SPTAN1_MIP_21 | cagtgctccgtagaagagcCTTCAGCTTCCCGATATCCGACGGTAGTGTatggtactgatctcaaaa     |
| SPTAN1_MIP_22 | cagtaagacccttctgtcaCTTCAGCTTCCCGATATCCGACGGTAGTGTacatttggcttcttggc      |
| SPTAN1_MIP_23 | cctcctgggcactaaggatttCTTCAGCTTCCCGATATCCGACGGTAGTGTaccacaggagctactctg   |
| SPTAN1_MIP_24 | atgctcctcttttggtaCTTCAGCTTCCCGATATCCGACGGTAGTGTtcttcaatgaagaactc        |

|               |                                                                        |
|---------------|------------------------------------------------------------------------|
| SPTAN1_MIP_25 | gagttcttcattggtaagcacacCTTCAGCTTCCCGATATCCGACGGTAGTGTcaaaaaggaggagcatg |
| SPTAN1_MIP_26 | atgagctcaagagttgggtcaatCTTCAGCTTCCCGATATCCGACGGTAGTGTctagagactcacagggg |
| SPTAN1_MIP_27 | agaatcacgaaaaactctgCTTCAGCTTCCCGATATCCGACGGTAGTGTacaatttattgtgagagc    |
| SPTAN1_MIP_28 | ctgattgatgtcaaccactatgCTTCAGCTTCCCGATATCCGACGGTAGTGTaagaaccctctcttta   |
| SPTAN1_MIP_29 | ggccagcttttccaaggaCTTCAGCTTCCCGATATCCGACGGTAGTGTgcacaattcaatggaacat    |
| SPTAN1_MIP_30 | cggatgattacggcaaaagatCTTCAGCTTCCCGATATCCGACGGTAGTGTaaagcagtaaaaataaac  |
| SPTAN1_MIP_31 | agccaagtacaccttacttcaCTTCAGCTTCCCGATATCCGACGGTAGTGTtctgcattcacttgccc   |
| SPTAN1_MIP_32 | cgctatgaggcactcaaggagCTTCAGCTTCCCGATATCCGACGGTAGTGTgtaaagtctgctctgctt  |
| SPTAN1_MIP_33 | cacgaggcttctgcttcttctCTTCAGCTTCCCGATATCCGACGGTAGTGTcaatgggctcttctctc   |
| SPTAN1_MIP_34 | ggatgggagggtcgaattttaaCTTCAGCTTCCCGATATCCGACGGTAGTGTatgaggagacgtggatt  |
| SPTAN1_MIP_35 | catggtggaggaagtgatgCTTCAGCTTCCCGATATCCGACGGTAGTGTggcagtgctgctctt       |
| SPTAN1_MIP_36 | cattcccctctgttaactgcCTTCAGCTTCCCGATATCCGACGGTAGTGTgggatgattcagcccc     |
| SPTAN1_MIP_37 | gcaggcccagcagcttctgCTTCAGCTTCCCGATATCCGACGGTAGTGTctctttccctaccactctc   |
| SPTAN1_MIP_38 | gggaagcttggcttcagtgCTTCAGCTTCCCGATATCCGACGGTAGTGTgagcttctgctctgcca     |
| SPTAN1_MIP_39 | gcttgactgagaaggaagtagCTTCAGCTTCCCGATATCCGACGGTAGTGTaaagcagctgaatcct    |
| SPTAN1_MIP_40 | gtttatgggttactggaggaggCTTCAGCTTCCCGATATCCGACGGTAGTGTcattgtgtggtttgt    |
| SPTAN1_MIP_41 | aaacaaaaccacacatggagcCTTCAGCTTCCCGATATCCGACGGTAGTGTccctccagtaaccataa   |
| SPTAN1_MIP_42 | ccttacctactcaacagcacCTTCAGCTTCCCGATATCCGACGGTAGTGTtttgccttctcttggatt   |
| SPTAN1_MIP_43 | cccttctcatgtgacacCTTCAGCTTCCCGATATCCGACGGTAGTGTtctcatttccagggagcat     |
| SPTAN1_MIP_44 | caaggcagcatagcactgCTTCAGCTTCCCGATATCCGACGGTAGTGTcagttctcctctttttctc    |
| SPTAN1_MIP_45 | gactgggagggtccaatttcCTTCAGCTTCCCGATATCCGACGGTAGTGTcatgtggaacagatagc    |
| SPTAN1_MIP_46 | gctaccctatccttctcctctCTTCAGCTTCCCGATATCCGACGGTAGTGTcatgcttttctgtgccc   |
| SPTAN1_MIP_47 | gagggggcacagaaaagcatCTTCAGCTTCCCGATATCCGACGGTAGTGTcagagggagaatggatagg  |
| SPTAN1_MIP_48 | gagaaggaagcctctgacCTTCAGCTTCCCGATATCCGACGGTAGTGTgcacccttgaattccat      |
| SPTAN1_MIP_49 | gcttcacggaacaacataaactCTTCAGCTTCCCGATATCCGACGGTAGTGTgaagactgccatacctt  |
| SPTAN1_MIP_50 | gtgcagtggtatgactctggcCTTCAGCTTCCCGATATCCGACGGTAGTGTagaagttgatgactcca   |
| SPTAN1_MIP_51 | caacaggtaggtgtctcatcCTTCAGCTTCCCGATATCCGACGGTAGTGTgggttttagttattatggc  |
| SPTAN1_MIP_52 | agaccttcagactccaggtctCTTCAGCTTCCCGATATCCGACGGTAGTGTgtatgaaacactgctctg  |
| SPTAN1_MIP_53 | gggaagaatatcaagccaagaCTTCAGCTTCCCGATATCCGACGGTAGTGTgagagagactgtattctt  |
| SPTAN1_MIP_54 | agagagaaaccagtttattattaCTTCAGCTTCCCGATATCCGACGGTAGTGTgacaattctgatgaag  |
| SPTAN1_MIP_55 | gtgtgcttctctgaatattcCTTCAGCTTCCCGATATCCGACGGTAGTGTgcataaattcctcttct    |
| SPTAN1_MIP_56 | gaaagagggaatttaggcagccaaCTTCAGCTTCCCGATATCCGACGGTAGTGTtcagagaaaggcacac |
| SPTAN1_MIP_57 | gtctacagcagagcttcttctCTTCAGCTTCCCGATATCCGACGGTAGTGTtctgcttctcctctacc   |
| SPTAN1_MIP_58 | gtagggaggaagcagaaggCTTCAGCTTCCCGATATCCGACGGTAGTGTaagagctctgctgtagac    |
| SPTAN1_MIP_59 | ggctgggagaggagaaacagCTTCAGCTTCCCGATATCCGACGGTAGTGTctgatgtttctgtctctg   |
| SPTAN1_MIP_60 | cctgtcatccccagctcagCTTCAGCTTCCCGATATCCGACGGTAGTGTctgtggaacctctgtacttc  |
| SPTAN1_MIP_61 | gagggcttcagaggggaccttCTTCAGCTTCCCGATATCCGACGGTAGTGTaacctgaaatgtgtctgc  |
| SPTAN1_MIP_62 | ggacactggcagatcatgtctcCTTCAGCTTCCCGATATCCGACGGTAGTGTctgcagaacagaagactc |
| SPTAN1_MIP_63 | ggaaacgtgcagatcagcctCTTCAGCTTCCCGATATCCGACGGTAGTGTcattcacccttctccca    |
| SPTAN1_MIP_64 | gctccaggcctggtttaactcCTTCAGCTTCCCGATATCCGACGGTAGTGTctcaaaagaaggctctatg |
| SPTAN1_MIP_65 | gtggacctgctgctgtagCTTCAGCTTCCCGATATCCGACGGTAGTGTctattttctggggctgctg    |
| SPTAN1_MIP_66 | gaaaccagcaccagaaaaatagCTTCAGCTTCCCGATATCCGACGGTAGTGTtactcagcaggcagg    |
| SPTAN1_MIP_67 | aactgtatattctgaccaggagCTTCAGCTTCCCGATATCCGACGGTAGTGTcccttccctcttttgg   |
| SPTAN1_MIP_68 | gcttgatctcagggtgcatCTTCAGCTTCCCGATATCCGACGGTAGTGTgaaggaacacttggtca     |
| SPTAN1_MIP_69 | caaaaaacatgaagactttgacaCTTCAGCTTCCCGATATCCGACGGTAGTGTacctgcctctgcccct  |
| SPTAN1_MIP_70 | cagagcctctacgtgtccaCTTCAGCTTCCCGATATCCGACGGTAGTGTcttgagataaacagtac     |
| SPTAN1_MIP_71 | gtgtcctgtgactgacatCTTCAGCTTCCCGATATCCGACGGTAGTGTtctcatgctttgtttctg     |
| SPTAN1_MIP_72 | cagaaaacaaaggcatgagatcaCTTCAGCTTCCCGATATCCGACGGTAGTGTcagtcacagagacac   |
| SPTAN1_MIP_73 | gaaaaattgcaaacagcagctCTTCAGCTTCCCGATATCCGACGGTAGTGTtctcatggtttcactctt  |
| SPTAN1_MIP_74 | ccacatcccggctgaactgtCTTCAGCTTCCCGATATCCGACGGTAGTGTtctactcaataacaaggc   |
| SPTAN1_MIP_75 | ggtttgctggtgtcttcaCTTCAGCTTCCCGATATCCGACGGTAGTGTcttgtcttttaactgttt     |
| SPTAN1_MIP_76 | aacagataaaagaacaagagttcCTTCAGCTTCCCGATATCCGACGGTAGTGTtagacaccagcaaacg  |
| SPTAN1_MIP_77 | attgaactggagcctgtgccCTTCAGCTTCCCGATATCCGACGGTAGTGTtagcaggaactggtttgaa  |
| SPTAN1_MIP_78 | aggagattgccatgtcgaCTTCAGCTTCCCGATATCCGACGGTAGTGTctaagactgatgtccaag     |
| SPTAN1_MIP_79 | gcagaactcaacacaggaCTTCAGCTTCCCGATATCCGACGGTAGTGTcttcatagatttactctct    |
| SPTAN1_MIP_80 | gcttgtgcttcttctgcttCTTCAGCTTCCCGATATCCGACGGTAGTGTggtttgggactgagtg      |
| SPTAN1_MIP_81 | gtaagcaaaaggaggcggcCTTCAGCTTCCCGATATCCGACGGTAGTGTctttgcttttgtgtttca    |
| SPTAN1_MIP_82 | catgggcagatatctgcttCTTCAGCTTCCCGATATCCGACGGTAGTGTacaaccttggagaatggct   |
| SPTAN1_MIP_83 | cagaagatcaagagcatggcCTTCAGCTTCCCGATATCCGACGGTAGTGTgaccttctatgtcccct    |
| SPTAN1_MIP_84 | gcccgttgatggtgtcctctCTTCAGCTTCCCGATATCCGACGGTAGTGTctagaggctgagaagaca   |
| SPTAN1_MIP_85 | ccggctattcaggaaggaggCTTCAGCTTCCCGATATCCGACGGTAGTGTctgtttccatctctcatt   |
| SPTAN1_MIP_86 | gcttctcctcaggtctgcacCTTCAGCTTCCCGATATCCGACGGTAGTGTgaataaagcgaagggg     |
| SPTAN1_MIP_87 | aaagagctgaagcagctgcaCTTCAGCTTCCCGATATCCGACGGTAGTGTtagctactgctgttaacct  |
| SPTAN1_MIP_88 | gtgtgtcatcgacagcttctCTTCAGCTTCCCGATATCCGACGGTAGTGTgctggccttccacttg     |
| SPTAN1_MIP_89 | attatggcagactcttccgCTTCAGCTTCCCGATATCCGACGGTAGTGTgattttctctgtctct      |

|                |                                                                        |
|----------------|------------------------------------------------------------------------|
| SPTAN1_MIP_90  | ggccaccagggtcattttctcatCTTCAGCTTCCCGATATCCGACGGTAGTGTgagcaggggccctcaac |
| SPTAN1_MIP_91  | cccattggaagacctccatcgCTTCAGCTTCCCGATATCCGACGGTAGTGTctctggctcttctactc   |
| SPTAN1_MIP_92  | gagtagaagcagccaaggcacCTTCAGCTTCCCGATATCCGACGGTAGTGTggaggcttccaatggg    |
| SPTAN1_MIP_93  | actggcctctctcagttcaaCTTCAGCTTCCCGATATCCGACGGTAGTGTgtgtgctctctccatg     |
| SPTAN1_MIP_94  | gctttctccaggctgacactttCTTCAGCTTCCCGATATCCGACGGTAGTGTcagctctgggaaggctc  |
| SPTAN1_MIP_95  | gtatgcagatagcatctgtgagCTTCAGCTTCCCGATATCCGACGGTAGTGTattttccacactcgttt  |
| SPTAN1_MIP_96  | gtggaaaataactgccctccCTTCAGCTTCCCGATATCCGACGGTAGTGTatctgcatactttcaacc   |
| SPTAN1_MIP_97  | gttcagccaaggccatcgagCTTCAGCTTCCCGATATCCGACGGTAGTGTctgtggagtcaccacaat   |
| SPTAN1_MIP_98  | gagaagctgatctttgaggcaCTTCAGCTTCCCGATATCCGACGGTAGTGTgcggaagtgactctgag   |
| SPTAN1_MIP_99  | ggaagctgtgagctcagtgcaCTTCAGCTTCCCGATATCCGACGGTAGTGTcaagaagaagcttggag   |
| SPTAN1_MIP_100 | aaatcaaagctttgcgagggCTTCAGCTTCCCGATATCCGACGGTAGTGTactcagctctctctgcttc  |
| SPTAN1_MIP_101 | cggggctgttaagtctctctCTTCAGCTTCCCGATATCCGACGGTAGTGTcggaagctcttgatctgg   |
| SPTAN1_MIP_102 | aaaatcatcaaggtacacctcccCTTCAGCTTCCCGATATCCGACGGTAGTGTgctctgccaggctga   |
| SPTAN1_MIP_103 | gggcctccatgtaaacaggCTTCAGCTTCCCGATATCCGACGGTAGTGTcttctgtgactcagtta     |
| SPTAN1_MIP_104 | cgccaggagttggccagcacCTTCAGCTTCCCGATATCCGACGGTAGTGTgagccatctggaaggag    |
| SPTAN1_MIP_105 | ccgctgttctctgagctCTTCAGCTTCCCGATATCCGACGGTAGTGTcttaagtacagcaggacat     |
| SPTAN1_MIP_106 | gtggctggctgtggaggaCTTCAGCTTCCCGATATCCGACGGTAGTGTgtttgccgacaccactt      |
| SPTAN1_MIP_107 | gagacaagtggtgtccgacaacCTTCAGCTTCCCGATATCCGACGGTAGTGTatctccacaagccag    |
| SPTAN1_MIP_108 | gtggggctctggcccagcagagaCTTCAGCTTCCCGATATCCGACGGTAGTGTtctcattctgagcttc  |
| SPTAN1_MIP_109 | acgtggaaggacagtgggaaagCTTCAGCTTCCCGATATCCGACGGTAGTGTagggaagggtaccctg   |
| SPTAN1_MIP_110 | acatggaaggacagtgggaaagCTTCAGCTTCCCGATATCCGACGGTAGTGTagggaagggtaccctg   |
| SPTAN1_MIP_111 | cctcatctggaacaagtacacCTTCAGCTTCCCGATATCCGACGGTAGTGTgactgagctgagggc     |
| SPTAN1_MIP_112 | caggctctgactcttttgagctCTTCAGCTTCCCGATATCCGACGGTAGTGTctgctctccaggttgt   |
| SPTAN1_MIP_113 | ccctaattctgtttttctccagCTTCAGCTTCCCGATATCCGACGGTAGTGTgggcatgcatgag      |
| SPTAN1_MIP_114 | gaacagacctccacacagcaggtCTTCAGCTTCCCGATATCCGACGGTAGTGTctgctgcccgaacacc  |
| SPTAN1_MIP_115 | gagttcaggcaactctggacacCTTCAGCTTCCCGATATCCGACGGTAGTGTccctcggtttgtctg    |
| SPTAN1_MIP_116 | caggcaagattgaaactcctgatCTTCAGCTTCCCGATATCCGACGGTAGTGTcgggagaggctcaca   |
| SPTAN1_MIP_117 | gagggaagcctacgtgaccaagCTTCAGCTTCCCGATATCCGACGGTAGTGTtttctccccgctcc     |
| SPTAN1_MIP_118 | gctctcaactcctcgtggaCTTCAGCTTCCCGATATCCGACGGTAGTGTctcagctctgccacaatt    |
| SPTAN1_MIP_119 | cgctttctgtaactgagccaCTTCAGCTTCCCGATATCCGACGGTAGTGTgggtccatcttaccaca    |
| SPTAN1_MIP_120 | gggtgaactccactgagctgaaCTTCAGCTTCCCGATATCCGACGGTAGTGTaaagtaagcaggctaa   |
| CDKL5_MIP_1    | cgctctctgagttttgagcaatCTTCAGCTTCCCGATATCCGACGGTAGTGTcttttggctcatgtttt  |
| CDKL5_MIP_2    | actcctctttgatgcaagcCTTCAGCTTCCCGATATCCGACGGTAGTGTggtggaataactaactgtt   |
| CDKL5_MIP_3    | gtcttctgctgaggcatgtaCTTCAGCTTCCCGATATCCGACGGTAGTGTgcccttgattgttacttc   |
| CDKL5_MIP_4    | aaagaagtaaacatcaaggccCTTCAGCTTCCCGATATCCGACGGTAGTGTacatgccaccacgcaaa   |
| CDKL5_MIP_5    | gttttatacatagagtggCTTCAGCTTCCCGATATCCGACGGTAGTGTtctctctgctcttttcc      |
| CDKL5_MIP_6    | agggaaaagaagcagaaggaCTTCAGCTTCCCGATATCCGACGGTAGTGTccacactctatgataaaa   |
| CDKL5_MIP_7    | ggggaaagtgtacttgggtCTTCAGCTTCCCGATATCCGACGGTAGTGTtttttagtctctaccatt    |
| CDKL5_MIP_8    | gttttctgctgagagctcggCTTCAGCTTCCCGATATCCGACGGTAGTGTgcagaacacagccttaaat  |
| CDKL5_MIP_9    | actggtccataagaatgatatCTTCAGCTTCCCGATATCCGACGGTAGTGTgacctacctaattgggaa  |
| CDKL5_MIP_10   | aggtggaactcattggcaCTTCAGCTTCCCGATATCCGACGGTAGTGTactcttaactttatgtgag    |
| CDKL5_MIP_11   | gtaacacataggtagctttCTTCAGCTTCCCGATATCCGACGGTAGTGTtttttttatcttgacact    |
| CDKL5_MIP_12   | gagtgtaagataaaaaaaaaCTTCAGCTTCCCGATATCCGACGGTAGTGTaaaagctacctatgtgta   |
| CDKL5_MIP_13   | ggtgagttaccgtccaaaaCTTCAGCTTCCCGATATCCGACGGTAGTGTtctttttcaaaagtacaac   |
| CDKL5_MIP_14   | gcattattgcctctgacagaCTTCAGCTTCCCGATATCCGACGGTAGTGTgagtaactcaaaagcaat   |
| CDKL5_MIP_15   | cttagcagtgagacgctttCTTCAGCTTCCCGATATCCGACGGTAGTGTgttccaataattggaaa     |
| CDKL5_MIP_16   | cccaagaatacagcccaccgacCTTCAGCTTCCCGATATCCGACGGTAGTGTcatggaagcaggattac  |
| CDKL5_MIP_17   | ggaatgctaaactatccttgaaCTTCAGCTTCCCGATATCCGACGGTAGTGTcacttccatctgagcag  |
| CDKL5_MIP_18   | ggtaaggccaattgatattatctCTTCAGCTTCCCGATATCCGACGGTAGTGTcacatgctctcccaaa  |
| CDKL5_MIP_19   | ggtatcttctccaaggactCTTCAGCTTCCCGATATCCGACGGTAGTGTtattcataaaagcaggc     |
| CDKL5_MIP_20   | gttctctcaaggtcagcaCTTCAGCTTCCCGATATCCGACGGTAGTGTgactttgtaattgtcttaa    |
| CDKL5_MIP_21   | atcagaagtctctgggtttaaCTTCAGCTTCCCGATATCCGACGGTAGTGTcactctccactact      |
| CDKL5_MIP_22   | gtctccctccaatgaaagcCTTCAGCTTCCCGATATCCGACGGTAGTGTggaactgatatactcttt    |
| CDKL5_MIP_23   | gggcaggcctacactcaggtCTTCAGCTTCCCGATATCCGACGGTAGTGTgtgagatcttctggtgag   |
| CDKL5_MIP_24   | cagggacaaagtacctcaagctcaCTTCAGCTTCCCGATATCCGACGGTAGTGTaagcagccagctggg  |
| CDKL5_MIP_25   | gccttctgaaggctttgggtCTTCAGCTTCCCGATATCCGACGGTAGTGTgtgtcaatatagctatgcc  |
| CDKL5_MIP_26   | gtctgtgagcaactttctgagCTTCAGCTTCCCGATATCCGACGGTAGTGTcaagctgggacactgc    |
| CDKL5_MIP_27   | ccttggctctgaggaggactCTTCAGCTTCCCGATATCCGACGGTAGTGTctgggtgggaaattcaag   |
| CDKL5_MIP_28   | cacaaccagacattcaagacCTTCAGCTTCCCGATATCCGACGGTAGTGTtccatctagctgcttag    |
| CDKL5_MIP_29   | ccagcttccctcattcggtCTTCAGCTTCCCGATATCCGACGGTAGTGTggtgtagcccagctcaaa    |
| CDKL5_MIP_30   | catagggcaaggatggcagcCTTCAGCTTCCCGATATCCGACGGTAGTGTgacacctacgaatctttt   |
| CDKL5_MIP_31   | caagcttccatcaagccctgCTTCAGCTTCCCGATATCCGACGGTAGTGTggacctcatcatccc      |
| CDKL5_MIP_32   | cagaagtctgaggtatgtcacCTTCAGCTTCCCGATATCCGACGGTAGTGTaacaggatgctctataaa  |
| CDKL5_MIP_33   | ctgtatggaaggaaagggtCTTCAGCTTCCCGATATCCGACGGTAGTGTtactactttataagccac    |
| CDKL5_MIP_34   | gtccaaggagagttgtagCTTCAGCTTCCCGATATCCGACGGTAGTGTaggcaatattgtcatcaag    |

|               |                                                                         |
|---------------|-------------------------------------------------------------------------|
| CDKL5_MIP_35  | gggtctattttcttgggggctCTTCAGTTCCTCCGATATCCGACGGTAGTGTggcctgagtcggtgaa    |
| CDKL5_MIP_36  | aaaagacaaccagcattcgtCTTCAGTTCCTCCGATATCCGACGGTAGTGTgtagcattcagtgacttact |
| CDKL5_MIP_37  | gagtggttggtccagaactgcCTTCAGTTCCTCCGATATCCGACGGTAGTGTgcttagcaggagaaaagga |
| CDKL5_MIP_38  | ggtcaatgaaaaaagaaaagaaagCTTCAGTTCCTCCGATATCCGACGGTAGTGTtttgcacacaatggca |
| CDKL5_MIP_39  | aaatccttgcttcttctttccCTTCAGTTCCTCCGATATCCGACGGTAGTGTatcaacttgattgcca    |
| CDKL5_MIP_40  | agatctcagatctcagaccCTTCAGTTCCTCCGATATCCGACGGTAGTGTgtcttattgaatgctgtc    |
| CDKL5_MIP_41  | cctttggtctgctgttggagCTTCAGTTCCTCCGATATCCGACGGTAGTGTgagaggcctaatttctct   |
| CDKL5_MIP_42  | attcctctcagaattcggactTCAGTTCCTCCGATATCCGACGGTAGTGTgacttctcatcttcttct    |
| CDKL5_MIP_43  | attgaggccgaagagagatgtaCTTCAGTTCCTCCGATATCCGACGGTAGTGTgggttctccggatgt    |
| CDKL5_MIP_44  | ccttctactctgaacagctgggtCTTCAGTTCCTCCGATATCCGACGGTAGTGTaggcctctggcggag   |
| CDKL5_MIP_45  | caagctgccataacgacctCTTCAGTTCCTCCGATATCCGACGGTAGTGTttttgttctcccactaac    |
| CDKL5_MIP_46  | gtagtgaggagaaacaaagaCTTCAGTTCCTCCGATATCCGACGGTAGTGTggctgtatggcagcttg    |
| CDKL5_MIP_47  | ccgaggcacttcatgtgccCTTCAGTTCCTCCGATATCCGACGGTAGTGTactgcctctgaatatttct   |
| CDKL5_MIP_48  | cctggagtactggataggagcCTTCAGTTCCTCCGATATCCGACGGTAGTGTgcaattccgaggtagcgc  |
| CDKL5_MIP_49  | gctgcgctctgacatacctgCTTCAGTTCCTCCGATATCCGACGGTAGTGTcagagtgcacctgtagc    |
| CDKL5_MIP_50  | ggttacctggccctgtgaCTTCAGTTCCTCCGATATCCGACGGTAGTGTatgggtgattcattggtgt    |
| ARX_MIP_1     | ccttgccctgagcctcagcCTTCAGTTCCTCCGATATCCGACGGTAGTGTgagtggtgctgagtgaggt   |
| ARX_MIP_2     | gcacgcgccgagctcagcagctCTTCAGTTCCTCCGATATCCGACGGTAGTGTgctcctcagagcagc    |
| ARX_MIP_3     | cgctcgggagcgtctcccgctCTTCAGTTCCTCCGATATCCGACGGTAGTGTtccacggagctggctg    |
| ARX_MIP_4     | gaggagtaggctcgggaaggCTTCAGTTCCTCCGATATCCGACGGTAGTGTgacttccgagctgctg     |
| ARX_MIP_5     | cggccagctgcccagcctCTTCAGTTCCTCCGATATCCGACGGTAGTGTcaccaccgctcagcccc      |
| ARX_MIP_6     | ggttctggaaccagactcgaaggCTTCAGTTCCTCCGATATCCGACGGTAGTGTcggagggaaggggctg  |
| ARX_MIP_7     | cggccaagtggcgcaagcgggaCTTCAGTTCCTCCGATATCCGACGGTAGTGTcgcggtgaaaggaaagg  |
| ARX_MIP_8     | ctattctctctatggcaggcCTTCAGTTCCTCCGATATCCGACGGTAGTGTtcttctctgttgtgc      |
| ARX_MIP_9     | gctgcacaacagagggaagagCTTCAGTTCCTCCGATATCCGACGGTAGTGTcctgccaatagaggagaaa |
| ARX_MIP_10    | ccctctccgagtcgctcccCTTCAGTTCCTCCGATATCCGACGGTAGTGTgaccaccctcagcgc       |
| ARX_MIP_11    | cacgttcaccagctaccagctgCTTCAGTTCCTCCGATATCCGACGGTAGTGTaccacaggaggagctgc  |
| ARX_MIP_12    | gcgcggggctgctctccagcCTTCAGTTCCTCCGATATCCGACGGTAGTGTcgtcttccggctgagc     |
| ARX_MIP_13    | cagcagctgctcctcctgctCTTCAGTTCCTCCGATATCCGACGGTAGTGTtaggacaagaagagaggac  |
| ARX_MIP_14    | cgggtgctgagcctcccgctCTTCAGTTCCTCCGATATCCGACGGTAGTGTcagagcttcttctct      |
| ARX_MIP_15    | aggagcctcggcgtggccCTTCAGTTCCTCCGATATCCGACGGTAGTGTcgtcaagatcagcaggcg     |
| ARX_MIP_16    | cggaggggctctcccgctgCTTCAGTTCCTCCGATATCCGACGGTAGTGTcggctgatgctcactgcg    |
| ARX_MIP_17    | cgccaccgcaaccgctgCTTCAGTTCCTCCGATATCCGACGGTAGTGTgctgctgagcctgtacggc     |
| ARX_MIP_18    | cggggagtccagcaggcctgCTTCAGTTCCTCCGATATCCGACGGTAGTGTggaggcggcccccgccg    |
| ARX_MIP_19    | gatgtagtaggagagcaaaagCTTCAGTTCCTCCGATATCCGACGGTAGTGTcctgacgggagcatct    |
| ARX_MIP_20    | cccgtcaaaatgctggtgctCTTCAGTTCCTCCGATATCCGACGGTAGTGTcctgggaaaagccccag    |
| PCDH19_MIP_1  | gggctcagctcagaggagcCTTCAGTTCCTCCGATATCCGACGGTAGTGTtttcttcttctggagac     |
| PCDH19_MIP_2  | ggagctgatagcagaaagctCTTCAGTTCCTCCGATATCCGACGGTAGTGTaagagctctctcccac     |
| PCDH19_MIP_3  | catcgacagctcttctctCTTCAGTTCCTCCGATATCCGACGGTAGTGTgtagaagcaggaaggc       |
| PCDH19_MIP_4  | gaggcattagcctgctaccCTTCAGTTCCTCCGATATCCGACGGTAGTGTcaaccttgggaaagatgt    |
| PCDH19_MIP_5  | cacatgctcagggacttggaaCTTCAGTTCCTCCGATATCCGACGGTAGTGTcctctcctcagcgggt    |
| PCDH19_MIP_6  | ggaacatcatcgctgtctCTTCAGTTCCTCCGATATCCGACGGTAGTGTtttctttttcacaagat      |
| PCDH19_MIP_7  | ccttgggaaatggcacttttagCTTCAGTTCCTCCGATATCCGACGGTAGTGTggcattctccggca     |
| PCDH19_MIP_8  | gtcactctcctatgtccactaCTTCAGTTCCTCCGATATCCGACGGTAGTGTtaccatcaaccagctct   |
| PCDH19_MIP_9  | catgatgtccagggagcctCTTCAGTTCCTCCGATATCCGACGGTAGTGTtttaaaatcagatctgca    |
| PCDH19_MIP_10 | gatttcaactgcctacttagaCTTCAGTTCCTCCGATATCCGACGGTAGTGTaagcaagcaaaccaaca   |
| PCDH19_MIP_11 | gttggttcttcttattgctCTTCAGTTCCTCCGATATCCGACGGTAGTGTtagggcagcttcaaatct    |
| PCDH19_MIP_12 | gttctccacattcagaaagctCTTCAGTTCCTCCGATATCCGACGGTAGTGTacagagcacttagctg    |
| PCDH19_MIP_13 | gaatacccgcaaccagctgctCTTCAGTTCCTCCGATATCCGACGGTAGTGTtagacagacaagatgaaag |
| PCDH19_MIP_14 | attctatgtgacagaaaggcagCTTCAGTTCCTCCGATATCCGACGGTAGTGTaggaaagcaactgac    |
| PCDH19_MIP_15 | gctgagtactcctatggcaCTTCAGTTCCTCCGATATCCGACGGTAGTGTatgtaatcaccagaataag   |
| PCDH19_MIP_16 | agccgaggagacaagtgatggCTTCAGTTCCTCCGATATCCGACGGTAGTGTatgagggaaatgccttt   |
| PCDH19_MIP_17 | aaggacaaaacagcaagtgtctCTTCAGTTCCTCCGATATCCGACGGTAGTGTctttatgttccagtga   |
| PCDH19_MIP_18 | atcaaggacaagtcaacagagcCTTCAGTTCCTCCGATATCCGACGGTAGTGTaagaaagaaactggct   |
| PCDH19_MIP_19 | cattattgcctgggctcattCTTCAGTTCCTCCGATATCCGACGGTAGTGTatgagcttctggtgg      |
| PCDH19_MIP_20 | ggtcatgctgtagtgactggCTTCAGTTCCTCCGATATCCGACGGTAGTGTgagatgcttccgctggt    |
| PCDH19_MIP_21 | gaccgcttctttaaagctCTTCAGTTCCTCCGATATCCGACGGTAGTGTtctgattaacggcactgc     |
| PCDH19_MIP_22 | ccttggccagcacttgaattCTTCAGTTCCTCCGATATCCGACGGTAGTGTtggggatgtatgacc      |
| PCDH19_MIP_23 | gctacgtgctggctcatcatCTTCAGTTCCTCCGATATCCGACGGTAGTGTtccactatgtccatcaa    |
| PCDH19_MIP_24 | cagataggccagcagctgttCTTCAGTTCCTCCGATATCCGACGGTAGTGTtagatgctgctgagttgg   |
| PCDH19_MIP_25 | gacctggctcaaccgagctCTTCAGTTCCTCCGATATCCGACGGTAGTGTgcttcttaccgtgctcat    |
| PCDH19_MIP_26 | cagaatagtggagaagctctCTTCAGTTCCTCCGATATCCGACGGTAGTGTggttctattttctgtag    |
| PCDH19_MIP_27 | gcacgaccaatacaacctcaactCTTCAGTTCCTCCGATATCCGACGGTAGTGTgtgctgactcgcact   |
| PCDH19_MIP_28 | attgtcattggtgtccagcagcCTTCAGTTCCTCCGATATCCGACGGTAGTGTactgcacagctcattga  |
| PCDH19_MIP_29 | cggtcatcaacctgctcagctCTTCAGTTCCTCCGATATCCGACGGTAGTGTactggcctttagactac   |



|                 |                                                                         |
|-----------------|-------------------------------------------------------------------------|
| PCDH19_MIP_30   | catagaaggagtagaccacctggCTTCAGCTTCCCGATATCCGACGGTAGTGTccaagctcttagctgc   |
| PCDH19_MIP_31   | gctctttcagatcgaccgcacaCTTCAGCTTCCCGATATCCGACGGTAGTGTggtagctggcagaaa     |
| PCDH19_MIP_32   | ccaccgtctagcgcagtgattcCTTCAGCTTCCCGATATCCGACGGTAGTGTgacgggtgtgtgggagg   |
| PCDH19_MIP_33   | gactcfaatgacaacaaccggCTTCAGCTTCCCGATATCCGACGGTAGTGTtttgcgaactcgtggt     |
| PCDH19_MIP_34   | cgcaaaagctcctgagctgCTTCAGCTTCCCGATATCCGACGGTAGTGTaagctgtagtgcgactgc     |
| PCDH19_MIP_35   | gcagacttacagagctcagccCTTCAGCTTCCCGATATCCGACGGTAGTGTaaggacctgaacgacaatg  |
| PCDH19_MIP_36   | ggtcaatcttctgctgtgaccCTTCAGCTTCCCGATATCCGACGGTAGTGTctgcccggaaactgggc    |
| PCDH19_MIP_37   | gaggtcatgtccagctcaatggaCTTCAGCTTCCCGATATCCGACGGTAGTGTtttccgctgggtgcaaa  |
| PCDH19_MIP_38   | gcgctgctctctctaccgaCTTCAGCTTCCCGATATCCGACGGTAGTGTgagctgggattgatgcca     |
| PCDH19_MIP_39   | ggtgattgccaacgtggccaaagaCTTCAGCTTCCCGATATCCGACGGTAGTGTgacagaccccgctgcag |
| CACNA2D1_MIP_1  | aacaccaccacagctcagataaaCTTCAGCTTCCCGATATCCGACGGTAGTGTgggtcggagttaacta   |
| CACNA2D1_MIP_2  | ccctgtggtatattggaaCTTCAGCTTCCCGATATCCGACGGTAGTGTggattactctgaaagatgt     |
| CACNA2D1_MIP_3  | cgtagcctaaagagactgtCTTCAGCTTCCCGATATCCGACGGTAGTGTggacagtgaccattaatt     |
| CACNA2D1_MIP_4  | ccaaatcctgtgacatggtCTTCAGCTTCCCGATATCCGACGGTAGTGTtggatgagagtaaatgatg    |
| CACNA2D1_MIP_5  | gcttttccatgaaagattctCTTCAGCTTCCCGATATCCGACGGTAGTGTatggttttccctccaga     |
| CACNA2D1_MIP_6  | agcaaaaggacatgctcatCTTCAGCTTCCCGATATCCGACGGTAGTGTatgtaagaatcttgaaga     |
| CACNA2D1_MIP_7  | gtcatctctccatctcaacCTTCAGCTTCCCGATATCCGACGGTAGTGTctctgaaataaataaatt     |
| CACNA2D1_MIP_8  | ggcctcccgtccaagcagaCTTCAGCTTCCCGATATCCGACGGTAGTGTcttatacgtttattttgctc   |
| CACNA2D1_MIP_9  | gtttttacatgtaccatacacaCTTCAGCTTCCCGATATCCGACGGTAGTGTatgacaaggtctgagca   |
| CACNA2D1_MIP_10 | gtaaatgctcagacctgtcaCTTCAGCTTCCCGATATCCGACGGTAGTGTatgtatggttactgta      |
| CACNA2D1_MIP_11 | gtcaaaatttagttttattCTTCAGCTTCCCGATATCCGACGGTAGTGTcaattctcaaggggtactca   |
| CACNA2D1_MIP_12 | ataagattgttaaaagcatCTTCAGCTTCCCGATATCCGACGGTAGTGTtactgatactgaggacact    |
| CACNA2D1_MIP_13 | cagtcagtagtgagccggtCTTCAGCTTCCCGATATCCGACGGTAGTGTattttaagtgcacgttgct    |
| CACNA2D1_MIP_14 | caaaataaagtgaacagttaacacCTTCAGCTTCCCGATATCCGACGGTAGTGTtccgggaaacacactt  |
| CACNA2D1_MIP_15 | gctttcaaaagtgtttcccCTTCAGCTTCCCGATATCCGACGGTAGTGTaatgtttaactgttcaact    |
| CACNA2D1_MIP_16 | gttataattagaaatctgaaatCTTCAGCTTCCCGATATCCGACGGTAGTGTatgtatttaaatagtt    |
| CACNA2D1_MIP_17 | gaaaactattaaatcacttCTTCAGCTTCCCGATATCCGACGGTAGTGTtttcagaatttctaattat    |
| CACNA2D1_MIP_18 | gtataattagatgtaatacaacCTTCAGCTTCCCGATATCCGACGGTAGTGTacatagcataagaatttt  |
| CACNA2D1_MIP_19 | gatatttttaaaatttctatgCTTCAGCTTCCCGATATCCGACGGTAGTGTgcaaaaggtgtattaca    |
| CACNA2D1_MIP_20 | ggcaccaggtccaatttctaCTTCAGCTTCCCGATATCCGACGGTAGTGTaatataaagccaagtaaca   |
| CACNA2D1_MIP_21 | atcgggcattatggtgaagcaaCTTCAGCTTCCCGATATCCGACGGTAGTGTgctagaattttaagcaa   |
| CACNA2D1_MIP_22 | gccctaaggaggaaatggctCTTCAGCTTCCCGATATCCGACGGTAGTGTgagaaaagctgaattcaaaa  |
| CACNA2D1_MIP_23 | ggcaagaaaaccagagacatCTTCAGCTTCCCGATATCCGACGGTAGTGTctcttttagacatactgga   |
| CACNA2D1_MIP_24 | cagaagacaaaacaggaaatgCTTCAGCTTCCCGATATCCGACGGTAGTGTacaatccttggcgagct    |
| CACNA2D1_MIP_25 | aagactgcgcaaggattgtCTTCAGCTTCCCGATATCCGACGGTAGTGTcatttctgtttttgctt      |
| CACNA2D1_MIP_26 | cgcttactcaacacagaaaCTTCAGCTTCCCGATATCCGACGGTAGTGTactaaatgaaatcgaaat     |
| CACNA2D1_MIP_27 | gcaggctttacaatgaacttCTTCAGCTTCCCGATATCCGACGGTAGTGTtactctaaatgcttttg     |
| CACNA2D1_MIP_28 | gcagtaactcttgaaaaaaaCTTCAGCTTCCCGATATCCGACGGTAGTGTgaaccacactcaagcaat    |
| CACNA2D1_MIP_29 | gcagtaactcttgaaaaaaaCTTCAGCTTCCCGATATCCGACGGTAGTGTgaaccacactcaagcaat    |
| CACNA2D1_MIP_30 | atttcaacgagtttattgatagaaCTTCAGCTTCCCGATATCCGACGGTAGTGTgttttctactcctt    |
| CACNA2D1_MIP_31 | ggattagataggttaattcagagtCTTCAGCTTCCCGATATCCGACGGTAGTGTaaggctagctactgat  |
| CACNA2D1_MIP_32 | cagtagctagccctcaacaCTTCAGCTTCCCGATATCCGACGGTAGTGTgaattacctatctaactctg   |
| CACNA2D1_MIP_33 | gcaaaaggggtcataaacaatCTTCAGCTTCCCGATATCCGACGGTAGTGTgaaatgtcaagtgact     |
| CACNA2D1_MIP_34 | gtacactgacatttccactgaCTTCAGCTTCCCGATATCCGACGGTAGTGTtttatgaccccttggct    |
| CACNA2D1_MIP_35 | agcataaacacaaaacaaaCTTCAGCTTCCCGATATCCGACGGTAGTGTaatggacctgaagta        |
| CACNA2D1_MIP_36 | gtgacttcagggtcatttctCTTCAGCTTCCCGATATCCGACGGTAGTGTgtttgtttgtttatgc      |
| CACNA2D1_MIP_37 | atatatacgaaaaagtaaagcggCTTCAGCTTCCCGATATCCGACGGTAGTGTacataaaaatagttaat  |
| CACNA2D1_MIP_38 | actgtattttatgtattgtCTTCAGCTTCCCGATATCCGACGGTAGTGTttttctgatataatcat      |
| CACNA2D1_MIP_39 | caaagctgacgtgcaaaaatCTTCAGCTTCCCGATATCCGACGGTAGTGTgaataagctagaatcaattc  |
| CACNA2D1_MIP_40 | gaattgattcagcttattcttaaCTTCAGCTTCCCGATATCCGACGGTAGTGTggcaggtcagcttgg    |
| CACNA2D1_MIP_41 | gggttctacacagaaaacaataCTTCAGCTTCCCGATATCCGACGGTAGTGTgagaatgagtcatacc    |
| CACNA2D1_MIP_42 | acattgatttcttgatgcaCTTCAGCTTCCCGATATCCGACGGTAGTGTatcctaggttaattttgca    |
| CACNA2D1_MIP_43 | ccattggggcacagctgaaCTTCAGCTTCCCGATATCCGACGGTAGTGTacaatcctataaagaacatt   |
| CACNA2D1_MIP_44 | atcctaaggttatgttttataCTTCAGCTTCCCGATATCCGACGGTAGTGTatacaatgttatatta     |
| CACNA2D1_MIP_45 | caagaatcagctggttctataaCTTCAGCTTCCCGATATCCGACGGTAGTGTctaagtccaagctaagt   |
| CACNA2D1_MIP_46 | gatgggagtagatgtctttggaCTTCAGCTTCCCGATATCCGACGGTAGTGTctaattggaataataa    |
| CACNA2D1_MIP_47 | ccagttcctaaaaatagattcagCTTCAGCTTCCCGATATCCGACGGTAGTGTgacttcaacgtcacagt  |
| CACNA2D1_MIP_48 | cattactggaactctccgCTTCAGCTTCCCGATATCCGACGGTAGTGTtttggctctttataaagt      |
| CACNA2D1_MIP_49 | ccattggtcttccaaaacCTTCAGCTTCCCGATATCCGACGGTAGTGTatctagaagaagtagaata     |
| CACNA2D1_MIP_50 | gtgtacctggatgattggttaaCTTCAGCTTCCCGATATCCGACGGTAGTGTattcaacacagcattcc   |
| CACNA2D1_MIP_51 | attattttatttataaataCTTCAGCTTCCCGATATCCGACGGTAGTGTaaacaagtttataaatca     |
| CACNA2D1_MIP_52 | gattattaaactgtttaaCTTCAGCTTCCCGATATCCGACGGTAGTGTtttataaaataaataatt      |
| CACNA2D1_MIP_53 | cgtgaatacacgtacctggaCTTCAGCTTCCCGATATCCGACGGTAGTGTgatacacctaataaacta    |
| CACNA2D1_MIP_54 | ggtcaacacaattatgacagagCTTCAGCTTCCCGATATCCGACGGTAGTGTattcaactggaagcact   |
| CACNA2D1_MIP_55 | gcagtttctctggaacatCTTCAGCTTCCCGATATCCGACGGTAGTGTaaaaccctatagactatt      |

|                 |                                                                         |
|-----------------|-------------------------------------------------------------------------|
| CACNA2D1_MIP_56 | gctattcacggatggaggagaagCTTCAGCTTCCCGATATCCGACGGTAGTGTgcaacctgctcatgctc  |
| CACNA2D1_MIP_57 | aacactttttatttcttaccatCTTCAGCTTCCCGATATCCGACGGTAGTGTacaattgaacaacaaca   |
| CACNA2D1_MIP_58 | gaaggcttagtttctcttcttCTTCAGCTTCCCGATATCCGACGGTAGTGTtttgcagttaaacagca    |
| CACNA2D1_MIP_59 | gcttactcttcaaatgaaaaCTTCAGCTTCCCGATATCCGACGGTAGTGTaaacagcttaccatctga    |
| CACNA2D1_MIP_60 | gacaaatgggtccatcatgtCTTCAGCTTCCCGATATCCGACGGTAGTGTaatgacgtcatcttatact   |
| CACNA2D1_MIP_61 | cctgaattaaattgcaatttctCTTCAGCTTCCCGATATCCGACGGTAGTGTctaggagtggaaagtgt   |
| CACNA2D1_MIP_62 | gttgaattgatattactgactctCTTCAGCTTCCCGATATCCGACGGTAGTGTtagtatttaacaact    |
| CACNA2D1_MIP_63 | gggaggatttagataaacagtCTTCAGCTTCCCGATATCCGACGGTAGTGTtttggaaagaaaagcat    |
| CACNA2D1_MIP_64 | atattagatagctctaaaaataCTTCAGCTTCCCGATATCCGACGGTAGTGTcatggctagctaaaaat   |
| CACNA2D1_MIP_65 | gaatttttagctccatgaaCTTCAGCTTCCCGATATCCGACGGTAGTGTtttttagagcatatctaact   |
| CACNA2D1_MIP_66 | cactgtccagttagttcatCTTCAGCTTCCCGATATCCGACGGTAGTGTggaacttgacaatgattga    |
| CACNA2D1_MIP_67 | gcgaggaaagacccttaccatCTTCAGCTTCCCGATATCCGACGGTAGTGTaataaatgaagacattcagt |
| CACNA2D1_MIP_68 | gcctggctcactgtcatttCTTCAGCTTCCCGATATCCGACGGTAGTGTcaaacagatgtaacattct    |
| CACNA2D1_MIP_69 | gaagatgctaatttggagcacCTTCAGCTTCCCGATATCCGACGGTAGTGTgcaagtaagaagtgcat    |
| CACNA2D1_MIP_70 | atttaataaaaaaactactCTTCAGCTTCCCGATATCCGACGGTAGTGTatataaggccaacttttta    |
| CACNA2D1_MIP_71 | gtaaatgattggccttatatCTTCAGCTTCCCGATATCCGACGGTAGTGTtagtattttttataaaa     |
| CACNA2D1_MIP_72 | atcttagaattcaaatgaacacCTTCAGCTTCCCGATATCCGACGGTAGTGTcatacacaatagtcaag   |
| CACNA2D1_MIP_73 | aacccttttaactactgtattCTTCAGCTTCCCGATATCCGACGGTAGTGTttttatataacaattcc    |
| CACNA2D1_MIP_74 | ctggcgtcattatttgggtCTTCAGCTTCCCGATATCCGACGGTAGTGTgagatgcaaaatataataa    |
| CACNA2D1_MIP_75 | ggtagaaattgcagccaggCTTCAGCTTCCCGATATCCGACGGTAGTGTaaatacattccaatgggaac   |
| CACNA2D1_MIP_76 | ccatgattgatactgcagaaaCTTCAGCTTCCCGATATCCGACGGTAGTGTgataagaactgattcga    |
| CACNA2D1_MIP_77 | gcaagaagacctgtcacacCTTCAGCTTCCCGATATCCGACGGTAGTGTatntaaaggcattttaatga   |
| CACNA2D1_MIP_78 | gtgtcagagtcaaggccagcaggCTTCAGCTTCCCGATATCCGACGGTAGTGTggaaccgacccccacc   |
| CACNA2D1_MIP_79 | ccaatcttctgctacggccccCTTCAGCTTCCCGATATCCGACGGTAGTGTcgtgtgctgctctctc     |
| KCNQ2_MIP_1     | acagaggtcggagtcggtgtctCTTCAGCTTCCCGATATCCGACGGTAGTGTcaccgtgctgaggagg    |
| KCNQ2_MIP_2     | ggcgagggtccctttgggtgacCTTCAGCTTCCCGATATCCGACGGTAGTGTggatgcttcaacagctg   |
| KCNQ2_MIP_3     | gatggagatggagctgtcctCTTCAGCTTCCCGATATCCGACGGTAGTGTatgtaggacctgatttgg    |
| KCNQ2_MIP_4     | ggcttcagcatctccagctcaaaCTTCAGCTTCCCGATATCCGACGGTAGTGTgacagatgagcttctc   |
| KCNQ2_MIP_5     | ccgtggccctggcgcggtgctcCTTCAGCTTCCCGATATCCGACGGTAGTGTggcctctctctcgcg     |
| KCNQ2_MIP_6     | acctcccgtgggggaccagggCTTCAGCTTCCCGATATCCGACGGTAGTGTcaaatctgctgctc       |
| KCNQ2_MIP_7     | caaagttagcctcgttctgtCTTCAGCTTCCCGATATCCGACGGTAGTGTgcccgaagaatttcttgg    |
| KCNQ2_MIP_8     | gccggagccggcggcctaccCTTCAGCTTCCCGATATCCGACGGTAGTGTcaccaccgcccagcagc     |
| KCNQ2_MIP_9     | cgcccacagatcgtgtccacCTTCAGCTTCCCGATATCCGACGGTAGTGTccgaccctcccggcagc     |
| KCNQ2_MIP_10    | gatcacggacaaggaccaccaCTTCAGCTTCCCGATATCCGACGGTAGTGTgcttagaccagggggca    |
| KCNQ2_MIP_11    | ggacaccaggaacgcatgaCTTCAGCTTCCCGATATCCGACGGTAGTGTgacaggcaggcgggctctt    |
| KCNQ2_MIP_12    | gtgatggactcatcgagcagtCTTCAGCTTCCCGATATCCGACGGTAGTGTtaggaaggtcctggctc    |
| KCNQ2_MIP_13    | gcagctctgtcatcacaatgtcCTTCAGCTTCCCGATATCCGACGGTAGTGTggcaggaccaccgagc    |
| KCNQ2_MIP_14    | ccccggcctcaaatgtagcatCTTCAGCTTCCCGATATCCGACGGTAGTGTccccgggaataggtctccc  |
| KCNQ2_MIP_15    | gcacctgtcgggctgctcctCTTCAGCTTCCCGATATCCGACGGTAGTGTccatcccggagagagatg    |
| KCNQ2_MIP_16    | caagagctggaagcttggggCTTCAGCTTCCCGATATCCGACGGTAGTGTcagttgaaagatcgtgtct   |
| KCNQ2_MIP_17    | ggagagaagtactctgcaagaCTTCAGCTTCCCGATATCCGACGGTAGTGTcctcacagctgggctc     |
| KCNQ2_MIP_18    | gaggagagcacagttagtctctCTTCAGCTTCCCGATATCCGACGGTAGTGTtagtaagcaggagggg    |
| KCNQ2_MIP_19    | gccccctgcttactagagCTTCAGCTTCCCGATATCCGACGGTAGTGTggaactactgtctctct       |
| KCNQ2_MIP_20    | ccccccagatccatgggtcaCTTCAGCTTCCCGATATCCGACGGTAGTGTacaccagggtagcagcag    |
| KCNQ2_MIP_21    | ccccctgcttaccctggtctCTTCAGCTTCCCGATATCCGACGGTAGTGTgaccatgggactgtgg      |
| KCNQ2_MIP_22    | aaggagaggggagtgagctctcCTTCAGCTTCCCGATATCCGACGGTAGTGTaggaggactgagacgcc   |
| KCNQ2_MIP_23    | gggtggcgtctcagctctcctCTTCAGCTTCCCGATATCCGACGGTAGTGTgagacgtcactcccctc    |
| KCNQ2_MIP_24    | atgaaacaaatagttgaggaagtCTTCAGCTTCCCGATATCCGACGGTAGTGTggctctgtccatgc     |
| KCNQ2_MIP_25    | gaaatgcatggagcagaagccCTTCAGCTTCCCGATATCCGACGGTAGTGTtactttcctcaactattgt  |
| KCNQ2_MIP_26    | gtacatgggcacggtgaccgCTTCAGCTTCCCGATATCCGACGGTAGTGTcctttgaaaaatacattt    |
| KCNQ2_MIP_27    | gccaccaagcaactgtttcatttCTTCAGCTTCCCGATATCCGACGGTAGTGTtcttctcctcgcagtc   |
| KCNQ2_MIP_28    | gccaggcactcaggactctgggCTTCAGCTTCCCGATATCCGACGGTAGTGTggtgctgtagaattccca  |
| KCNQ2_MIP_29    | caagatgccctgcaattcatcagCTTCAGCTTCCCGATATCCGACGGTAGTGTggacaaggctgtgctg   |
| KCNQ2_MIP_30    | gtctgggttgcctgaaggttCTTCAGCTTCCCGATATCCGACGGTAGTGTggagtgtgctgacct       |
| KCNQ2_MIP_31    | gtggtcagctgatctgtgggacCTTCAGCTTCCCGATATCCGACGGTAGTGTcctcaaggcaggcagg    |
| KCNQ2_MIP_32    | gcaaccttaccctcatcgggtCTTCAGCTTCCCGATATCCGACGGTAGTGTgtccagcctgcctcag     |
| KCNQ2_MIP_33    | caggcagtgaccagctcctgCTTCAGCTTCCCGATATCCGACGGTAGTGTaaaccacaatgaccacaact  |
| KCNQ2_MIP_34    | gtacttggcagagaaggggagCTTCAGCTTCCCGATATCCGACGGTAGTGTtgggttgggtgggtga     |
| KCNQ2_MIP_35    | atctcaggaagcgcaggctCTTCAGCTTCCCGATATCCGACGGTAGTGTgaccagactcctgctgctg    |
| KCNQ2_MIP_36    | ggggaggcacctggaagctgCTTCAGCTTCCCGATATCCGACGGTAGTGTttagacatcatggtgctc    |
| KCNQ2_MIP_37    | gtcagaggggggggaaggttCTTCAGCTTCCCGATATCCGACGGTAGTGTcggcggcagcaccgcaa     |
| KCNQ2_MIP_38    | aacaccagatagtcacgatttCTTCAGCTTCCCGATATCCGACGGTAGTGTgcaataaccacccccacca  |
| KCNQ2_MIP_39    | ggcgtggagtactcgtgccaCTTCAGCTTCCCGATATCCGACGGTAGTGTcctgtggcttggctcct     |
| KCNQ2_MIP_40    | aggaacctggggcagggaaagcCTTCAGCTTCCCGATATCCGACGGTAGTGTcctctctcggcacttc    |
| KCNQ2_MIP_41    | gctgtctgttttccaccatcaaCTTCAGCTTCCCGATATCCGACGGTAGTGTctgctgctgctggtg     |

|               |                                                                         |
|---------------|-------------------------------------------------------------------------|
| KCNQ2_MIP_42  | cgccgccccgaggtttCTTCAGCTTCCCGATATCCGACGGTAGTGTgggcccccgccactc           |
| KCNQ2_MIP_43  | gaagcccccaagcgcaacgcttCTTCAGCTTCCCGATATCCGACGGTAGTGTggctctggggctgg      |
| KCNQ2_MIP_44  | gctcaggctcagcggggcgcttCTTCAGCTTCCCGATATCCGACGGTAGTGTggagtcggcgccggggg   |
| SLC2A1_MIP_1  | agcgatctcatcgaagtccCTTCAGCTTCCCGATATCCGACGGTAGTGTccttagggctgctggagca    |
| SLC2A1_MIP_2  | ccatcccctggggctgattcCTTCAGCTTCCCGATATCCGACGGTAGTGTcctctggtctgtcttca     |
| SLC2A1_MIP_3  | catcctggcttaggactttggaCTTCAGCTTCCCGATATCCGACGGTAGTGTtagtctcaggacttga    |
| SLC2A1_MIP_4  | atgaacatgggatggggcaggCTTCAGCTTCCCGATATCCGACGGTAGTGTgagacagtgggggtct     |
| SLC2A1_MIP_5  | atgaacatgggatggggcaggCTTCAGCTTCCCGATATCCGACGGTAGTGTgagacagtgggggtct     |
| SLC2A1_MIP_6  | gccgttcaggcttctcaaCTTCAGCTTCCCGATATCCGACGGTAGTGTctaccctggatgtctatct     |
| SLC2A1_MIP_7  | gagatatgcgagaaggcaggaaCTTCAGCTTCCCGATATCCGACGGTAGTGTaaagtgccacgatgct    |
| SLC2A1_MIP_8  | gagctatgcgagaaggcaggaaCTTCAGCTTCCCGATATCCGACGGTAGTGTaaagtgccacgatgct    |
| SLC2A1_MIP_9  | cagagacagctcagtgccaccCTTCAGCTTCCCGATATCCGACGGTAGTGTctccagaacctagcaact   |
| SLC2A1_MIP_10 | cagagacagctcagtgccaccCTTCAGCTTCCCGATATCCGACGGTAGTGTctccagaacctagcaact   |
| SLC2A1_MIP_11 | gagttgctaggttctggagagtCTTCAGCTTCCCGATATCCGACGGTAGTGTggcactgacgtgtctct   |
| SLC2A1_MIP_12 | gagttgctaggttctggagagtCTTCAGCTTCCCGATATCCGACGGTAGTGTggcactgacgtgtctct   |
| SLC2A1_MIP_13 | cagacaagaaactgttggggcCTTCAGCTTCCCGATATCCGACGGTAGTGTgccagtaagcaagact     |
| SLC2A1_MIP_14 | gagctttgctactggccccCTTCAGCTTCCCGATATCCGACGGTAGTGTcaacagtttctctgtct      |
| SLC2A1_MIP_15 | acgaagcctgtggtcaggccCTTCAGCTTCCCGATATCCGACGGTAGTGTgccgtgcccagcagtagat   |
| SLC2A1_MIP_16 | cctgggcacctgcaccagctCTTCAGCTTCCCGATATCCGACGGTAGTGTtctcgaaactgcaagt      |
| SLC2A1_MIP_17 | cattcctgggctccgaggggctCTTCAGCTTCCCGATATCCGACGGTAGTGTgactcagctctcaag     |
| SLC2A1_MIP_18 | cagaaaagatggccactgagaggCTTCAGCTTCCCGATATCCGACGGTAGTGTccacccatctgggact   |
| SLC2A1_MIP_19 | gtggccttttctgtaaccgCTTCAGCTTCCCGATATCCGACGGTAGTGTgtgatcaggagttctcaaa    |
| SLC2A1_MIP_20 | cagtcttcttcttcttctctCTTCAGCTTCCCGATATCCGACGGTAGTGTccagagcgtggtgagc      |
| SLC2A1_MIP_21 | aacaaaccacactgtatagcgtCTTCAGCTTCCCGATATCCGACGGTAGTGTccaacgatggcacag     |
| SLC2A1_MIP_22 | gtgccatcgtggctttaggaCTTCAGCTTCCCGATATCCGACGGTAGTGTtaacagtgtggtttgttc    |
| SLC2A1_MIP_23 | gtccgggactcccactgcgactCTTCAGCTTCCCGATATCCGACGGTAGTGTcccggcgcgcgact      |
| SLC2A1_MIP_24 | gagtcgccccggggcctctCTTCAGCTTCCCGATATCCGACGGTAGTGTgtagggagtcgggga        |
| SLC2A1_MIP_25 | gcatcatctgcgacttctctCTTCAGCTTCCCGATATCCGACGGTAGTGTgtgggtggggcactc       |
| SLC2A1_MIP_26 | gcatcatctgcgacttctctCTTCAGCTTCCCGATATCCGACGGTAGTGTgtgggtggggcactc       |
| SLC2A1_MIP_27 | ccagccatcctatcgtggtgCTTCAGCTTCCCGATATCCGACGGTAGTGTgtgctaagaagctgc       |
| SLC2A1_MIP_28 | actcttggcccgttctctctCTTCAGCTTCCCGATATCCGACGGTAGTGTgggtcagctcagctgtc     |
| SLC2A1_MIP_29 | cctgcccctccccactcccCTTCAGCTTCCCGATATCCGACGGTAGTGTctgctgctgagcatctct     |
| SLC2A1_MIP_30 | aacacctgggggaagcaggggcCTTCAGCTTCCCGATATCCGACGGTAGTGTgtgatgagcaggaagcg   |
| SLC2A1_MIP_31 | ggactccatcatgggcaacaagCTTCAGCTTCCCGATATCCGACGGTAGTGTctagaactggggccttc   |
| SCN1A_MIP_1   | gtggacatggtcagatcagttCTTCAGCTTCCCGATATCCGACGGTAGTGTaacaattgtcaccaatt    |
| SCN1A_MIP_2   | gcagctgtccaccttctatCTTCAGCTTCCCGATATCCGACGGTAGTGTaacaagcttctttacgta     |
| SCN1A_MIP_3   | gattggctgataggagacttCTTCAGCTTCCCGATATCCGACGGTAGTGTccacctttagtttttt      |
| SCN1A_MIP_4   | cgaaaacaagaggaagtatctgCTTCAGCTTCCCGATATCCGACGGTAGTGTatttctttacaacgcg    |
| SCN1A_MIP_5   | gattgagaggcgttcaagctCTTCAGCTTCCCGATATCCGACGGTAGTGTgactcctctctccactc     |
| SCN1A_MIP_6   | gccacaaccaaaactcagCTTCAGCTTCCCGATATCCGACGGTAGTGTgactcctcagtgaggatg      |
| SCN1A_MIP_7   | gttcaccacaaccaggaaggataCTTCAGCTTCCCGATATCCGACGGTAGTGTgactcctcagtgaggatg |
| SCN1A_MIP_8   | gcggtcatcctggagaacttctCTTCAGCTTCCCGATATCCGACGGTAGTGTccgactgtgacctataaa  |
| SCN1A_MIP_9   | gtctaaagtgaacatgtctctCTTCAGCTTCCCGATATCCGACGGTAGTGTactgagctccagggtt     |
| SCN1A_MIP_10  | ggcaacagcatgctgcttaCTTCAGCTTCCCGATATCCGACGGTAGTGTtctcgtggtttaaact       |
| SCN1A_MIP_11  | actcggaaacaggttaggggaCTTCAGCTTCCCGATATCCGACGGTAGTGTatgactaggaagagtaggag |
| SCN1A_MIP_12  | gatcaaaaggagaaaggggaCTTCAGCTTCCCGATATCCGACGGTAGTGTtttctcactggttgatt     |
| SCN1A_MIP_13  | agttcagtacacacttcaactCTTCAGCTTCCCGATATCCGACGGTAGTGTtttcagcttcaacttta    |
| SCN1A_MIP_14  | gatttgtggtgtcattctctCTTCAGCTTCCCGATATCCGACGGTAGTGTccagagtaatatgtgac     |
| SCN1A_MIP_15  | cattcctgaaattgttctgtaCTTCAGCTTCCCGATATCCGACGGTAGTGTgactcgtgacaaaatgg    |
| SCN1A_MIP_16  | gactcgtaacagacaagttCTTCAGCTTCCCGATATCCGACGGTAGTGTgactccttcaagaaac       |
| SCN1A_MIP_17  | ataaagatgcttacctcaactCTTCAGCTTCCCGATATCCGACGGTAGTGTaaagtttgttttgtat     |
| SCN1A_MIP_18  | aaaccgaaaagcctataaccCTTCAGCTTCCCGATATCCGACGGTAGTGTgaaaaaatgtacaaaagg    |
| SCN1A_MIP_19  | ggaccgaaagatgataaaataCTTCAGCTTCCCGATATCCGACGGTAGTGTgagagaaaactcca       |
| SCN1A_MIP_20  | caaccagcagaaaagaagataCTTCAGCTTCCCGATATCCGACGGTAGTGTcctttgtagtggaac      |
| SCN1A_MIP_21  | attattcagcttctgctgctCTTCAGCTTCCCGATATCCGACGGTAGTGTcagagaaaatagtttcac    |
| SCN1A_MIP_22  | gaaagaaatgagactgctgaCTTCAGCTTCCCGATATCCGACGGTAGTGTtctgctaattttcagcat    |
| SCN1A_MIP_23  | gcattcacaaccactaatacaCTTCAGCTTCCCGATATCCGACGGTAGTGTaccagttgtggttgaat    |
| SCN1A_MIP_24  | ccatcatgaatgtcttctgctCTTCAGCTTCCCGATATCCGACGGTAGTGTaaaaaagaatggaaagacc  |
| SCN1A_MIP_25  | actgaccaatgaaactgcactCTTCAGCTTCCCGATATCCGACGGTAGTGTcaggttcttcttcttttc   |
| SCN1A_MIP_26  | acagcaaatgcttgggttaCTTCAGCTTCCCGATATCCGACGGTAGTGTgaaactttctctgtaata     |
| SCN1A_MIP_27  | acctgtcagcatattcaacCTTCAGCTTCCCGATATCCGACGGTAGTGTgacaaaaaatgaaagcat     |
| SCN1A_MIP_28  | gcttctaaaatgggtggcatCTTCAGCTTCCCGATATCCGACGGTAGTGTttttgaaagctaataatgtg  |
| SCN1A_MIP_29  | gccttctccacattgattgtCTTCAGCTTCCCGATATCCGACGGTAGTGTcaccttttctaatctcac    |
| SCN1A_MIP_30  | gaggaaaaaatggtggaaccCTTCAGCTTCCCGATATCCGACGGTAGTGTaaaaagacaagacaaggac   |
| SCN1A_MIP_31  | gctacctgatgagctactCTTCAGCTTCCCGATATCCGACGGTAGTGTgactcactcaaatgaaa       |

|                |                                                                        |
|----------------|------------------------------------------------------------------------|
| SCN1A_MIP_32   | cctgtagaagaacacccgctCTTCAGCTTCCCGATATCCGACGGTAGTGTtagtaataatcctttctgg  |
| SCN1A_MIP_33   | gggggtttatgaatgacatgCTTCAGCTTCCCGATATCCGACGGTAGTGTataccttcccacacat     |
| SCN1A_MIP_34   | gtgactgtaccaattgctgtagCTTCAGCTTCCCGATATCCGACGGTAGTGTgggaaagatctgacta   |
| SCN1A_MIP_35   | gtttcctaataagagactgtgCTTCAGCTTCCCGATATCCGACGGTAGTGTccactgttagttccatt   |
| SCN1A_MIP_36   | caagaagacagttgatgtccCTTCAGCTTCCCGATATCCGACGGTAGTGTaaattgctgtgtaggga    |
| SCN1A_MIP_37   | ctttaaacaacaaaaaCTTCAGCTTCCCGATATCCGACGGTAGTGTcacataagctactcctttg      |
| SCN1A_MIP_38   | ggccttgctctgagctcatCTTCAGCTTCCCGATATCCGACGGTAGTGTcatcaagtttagaacctag   |
| SCN1A_MIP_39   | gcggaacacaatcaggaaggaCTTCAGCTTCCCGATATCCGACGGTAGTGTgcatatcctaagtggtac  |
| SCN1A_MIP_40   | ggggagtggatagagaccatgtgCTTCAGCTTCCCGATATCCGACGGTAGTGTgctggcatcagctctt  |
| SCN1A_MIP_41   | gttgccaagattttgccaCTTCAGCTTCCCGATATCCGACGGTAGTGTcaatctttgtagctttacc    |
| SCN1A_MIP_42   | atttaaccctgcttggccCTTCAGCTTCCCGATATCCGACGGTAGTGTatgctttaaagaatcataca   |
| SCN1A_MIP_43   | ccgtcaaagatattccagccCTTCAGCTTCCCGATATCCGACGGTAGTGTccctgattgtagaaggtt   |
| SCN1A_MIP_44   | cctgtagaacttgactcgtCTTCAGCTTCCCGATATCCGACGGTAGTGTaattttgtttgatcttagg   |
| SCN1A_MIP_45   | gcttatgctattttcccaCTTCAGCTTCCCGATATCCGACGGTAGTGTatccatggcaataatttc     |
| SCN1A_MIP_46   | ggtcaacaatgggtccatcaCTTCAGCTTCCCGATATCCGACGGTAGTGTctaacaacattacccttc   |
| SCN1A_MIP_47   | ggccatcaccatctgtattgtCTTCAGCTTCCCGATATCCGACGGTAGTGTatccaggcagaatgcc    |
| SCN1A_MIP_48   | cacacacattattcatccaCTTCAGCTTCCCGATATCCGACGGTAGTGTggagaacagctccaga      |
| SCN1A_MIP_49   | gaaagtcctaggaacgtggCTTCAGCTTCCCGATATCCGACGGTAGTGTgtttgaaatgagacaat     |
| SCN1A_MIP_50   | atccttcccaaggaacgaCTTCAGCTTCCCGATATCCGACGGTAGTGTgtttgctgtcatattgct     |
| SCN1A_MIP_51   | cactgccagcatcgggatCTTCAGCTTCCCGATATCCGACGGTAGTGTtagtagcttacttatta      |
| SCN1A_MIP_52   | ccagcgaatgggaagatcacCTTCAGCTTCCCGATATCCGACGGTAGTGTatgatgagcacagacctt   |
| SCN1A_MIP_53   | ccacggatgctcaacaagactaCTTCAGCTTCCCGATATCCGACGGTAGTGTcggctcctgtatcctc   |
| SCN1A_MIP_54   | ccctattttaccaagggcaCTTCAGCTTCCCGATATCCGACGGTAGTGTattctgttatgaatctgga   |
| SCN1A_MIP_55   | atgctgtcctcagattcagatCTTCAGCTTCCCGATATCCGACGGTAGTGTtctctccatgttttaatt  |
| SCN1A_MIP_56   | aggaggaaaggtttctctcCTTCAGCTTCCCGATATCCGACGGTAGTGTccttaagttagtccaa      |
| SCN1A_MIP_57   | gcctgctatatgaagaaatCTTCAGCTTCCCGATATCCGACGGTAGTGTtcttttctctccgatt      |
| SCN1A_MIP_58   | gcaacggcaactcctcagaCTTCAGCTTCCCGATATCCGACGGTAGTGTtctctgtgagatgatttc    |
| SCN1A_MIP_59   | cctcgtaggccatggccaccCTTCAGCTTCCCGATATCCGACGGTAGTGTgataaaagctcagtgccatg |
| SCN1A_MIP_60   | gccacctgggaagacagaaCTTCAGCTTCCCGATATCCGACGGTAGTGTtttgagacattactgtgc    |
| SCN1A_MIP_61   | actttcaattactcatgtgtctCTTCAGCTTCCCGATATCCGACGGTAGTGTtagtagaatgagccaa   |
| SCN1A_MIP_62   | cagctttcacacatatatccCTTCAGCTTCCCGATATCCGACGGTAGTGTgagtggtcttttagtt     |
| SCN1A_MIP_63   | aatcccaattatggctacacaaCTTCAGCTTCCCGATATCCGACGGTAGTGTaatcttctgactaggca  |
| SCN1A_MIP_64   | atgaacatttgattttaaCTTCAGCTTCCCGATATCCGACGGTAGTGTacatacaaatatacacag     |
| SCN1A_MIP_65   | gtatattgtatgtacacataCTTCAGCTTCCCGATATCCGACGGTAGTGTgcaaatgttcatcata     |
| SCN1A_MIP_66   | caaggaagcattggtgggagCTTCAGCTTCCCGATATCCGACGGTAGTGTaaggaaatgtacatacaat  |
| SCN1A_MIP_67   | atgaaactgtctttgagttgacCTTCAGCTTCCCGATATCCGACGGTAGTGTaaattgggctcagctg   |
| SCN1A_MIP_68   | cctgaaagaaagaagtcttactCTTCAGCTTCCCGATATCCGACGGTAGTGTtctcaggtgccat      |
| SCN1A_MIP_69   | gaaaaccattgtggagccctgCTTCAGCTTCCCGATATCCGACGGTAGTGTtctcactagcctgca     |
| SCN1A_MIP_70   | gagttcacacacaaacacaaaCTTCAGCTTCCCGATATCCGACGGTAGTGTccgtctcattatcaacc   |
| SCN1A_MIP_71   | gcaaggttagataatgagacggCTTCAGCTTCCCGATATCCGACGGTAGTGTttttgtttgtgtgga    |
| SCN1A_MIP_72   | agaatccccttgcaataattttCTTCAGCTTCCCGATATCCGACGGTAGTGTgcataagcactgatgga  |
| SCN1A_MIP_73   | atccatggaactggctcgtCTTCAGCTTCCCGATATCCGACGGTAGTGTaaactgttactttatcaa    |
| SCN1A_MIP_74   | gcatgctgaataatgtagttaCTTCAGCTTCCCGATATCCGACGGTAGTGTcagttcaaaatcccaaa   |
| SCN1A_MIP_75   | gtgcaatatttgacaaactgCTTCAGCTTCCCGATATCCGACGGTAGTGTtatccctgaaatttggt    |
| SCN1A_MIP_76   | ggaagatggccttcccttaCTTCAGCTTCCCGATATCCGACGGTAGTGTtctcagatcatgtacaaat   |
| SCN1A_MIP_77   | cacctctgcctgtacatttCTTCAGCTTCCCGATATCCGACGGTAGTGTtattatgacaagtaacaga   |
| SCN1A_MIP_78   | cactatttgctttggccaCTTCAGCTTCCCGATATCCGACGGTAGTGTcaaaatagctgataaaaa     |
| SCN1A_MIP_79   | catttattatgagacattctcCTTCAGCTTCCCGATATCCGACGGTAGTGTagaatctctgctgct     |
| SCN1A_MIP_80   | catctgtcatctgacattCTTCAGCTTCCCGATATCCGACGGTAGTGTcgtcatctttttgtctg      |
| SCN1A_MIP_81   | agcaaacagtctgtaccaCTTCAGCTTCCCGATATCCGACGGTAGTGTcatgttcatgacaagaatt    |
| SCN1A_MIP_82   | actttgagatgttctatgaggttCTTCAGCTTCCCGATATCCGACGGTAGTGTggaattttcttttt    |
| SCN1A_MIP_83   | gttaaatatgtaataaagatcatCTTCAGCTTCCCGATATCCGACGGTAGTGTatattgaattctaag   |
| SCN1A_MIP_84   | gaagtttaaatagttcaggcatCTTCAGCTTCCCGATATCCGACGGTAGTGTatgcacagcactgtgg   |
| SCN1A_MIP_85   | aacactcaaatgagaacaggaaggCTTCAGCTTCCCGATATCCGACGGTAGTGTcaaaaattattgactt |
| GRIN2B_MIP_001 | ccctatacagatgtccttctgCTTCAGCTTCCCGATATCCGACGGTAGTGTcttaacctctctgtccc   |
| GRIN2B_MIP_002 | gtgtgcctaacaacaaaacccaCTTCAGCTTCCCGATATCCGACGGTAGTGTggggcgctgaaagcc    |
| GRIN2B_MIP_003 | cccaaaagtgggatgaaaggtCTTCAGCTTCCCGATATCCGACGGTAGTGTatgaaagggccgagcca   |
| GRIN2B_MIP_004 | acgaccagtcttgctccatCTTCAGCTTCCCGATATCCGACGGTAGTGTttgccaacaacagctcctca  |
| GRIN2B_MIP_005 | catgaatcggcccttcttcaCTTCAGCTTCCCGATATCCGACGGTAGTGTgctgacatgtaccgc      |
| GRIN2B_MIP_006 | gcccctacgcccacatgtttgCTTCAGCTTCCCGATATCCGACGGTAGTGTccaagaagaaccggac    |
| GRIN2B_MIP_007 | cagttcctgaggagttgtccCTTCAGCTTCCCGATATCCGACGGTAGTGTtaggtgctgaggagtct    |
| GRIN2B_MIP_008 | cggtgacgtcaaacctccacCTTCAGCTTCCCGATATCCGACGGTAGTGTacggtgacgggtcagaac   |
| GRIN2B_MIP_009 | gttggtcaggttcttctccaaCTTCAGCTTCCCGATATCCGACGGTAGTGTtctgcaagcctcacacc   |
| GRIN2B_MIP_010 | caacttctgcccagctgtcccCTTCAGCTTCCCGATATCCGACGGTAGTGTgaggaggccctgtacca   |
| GRIN2B_MIP_011 | gtgagttctcttgttggaaactCTTCAGCTTCCCGATATCCGACGGTAGTGTttgtcggctccc       |

|                |                                                                         |
|----------------|-------------------------------------------------------------------------|
| GRIN2B_MIP_012 | gtagacctgaccgacatctacaagCTTCAGCTTCCCGATATCCGACGGTAGTGTtagctggcctaccgtcg |
| GRIN2B_MIP_013 | ccttatattgctgcttacgctcCTTCAGCTTCCCGATATCCGACGGTAGTGTtagccttcttctgtcc    |
| GRIN2B_MIP_014 | cagcctgaagaagcggcctgctcCTTCAGCTTCCCGATATCCGACGGTAGTGTaagagcagcctaca     |
| GRIN2B_MIP_015 | gcttctgctgatggacctggaCTTCAGCTTCCCGATATCCGACGGTAGTGTttgagatgctcagagaca   |
| GRIN2B_MIP_016 | gacatcgccctccctcctcCTTCAGCTTCCCGATATCCGACGGTAGTGTgtgtaccaagatcactacca   |
| GRIN2B_MIP_017 | gtttaggatttgctcagtaagCTTCAGCTTCCCGATATCCGACGGTAGTGTctatggggccgggtgt     |
| GRIN2B_MIP_018 | gccctgtgaggagaacctctcCTTCAGCTTCCCGATATCCGACGGTAGTGTgtaacctgtctgggtgga   |
| GRIN2B_MIP_019 | gggggagttcattacagactggcCTTCAGCTTCCCGATATCCGACGGTAGTGTggatgactccctcgga   |
| GRIN2B_MIP_020 | caacctgaacaacacactCTTCAGCTTCCCGATATCCGACGGTAGTGTgtgtttttgtgtcattt       |
| GRIN2B_MIP_021 | atgaggctgagagcctggcCTTCAGCTTCCCGATATCCGACGGTAGTGTtaacaagctttaggcattta   |
| GRIN2B_MIP_022 | aacaccttttctattggcagttCTTCAGCTTCCCGATATCCGACGGTAGTGTggctcactgcttctgt    |
| GRIN2B_MIP_023 | caggaaaggagcagagaaaaggCTTCAGCTTCCCGATATCCGACGGTAGTGTcaatgtccagctggctg   |
| GRIN2B_MIP_024 | gccaatggtcaccagcttcaCTTCAGCTTCCCGATATCCGACGGTAGTGTatgggaccttcccttct     |
| GRIN2B_MIP_025 | gggaaggcttcttccacCTTCAGCTTCCCGATATCCGACGGTAGTGTtctaaaattcctcattgga      |
| GRIN2B_MIP_026 | atatttctctgtgctcggCTTCAGCTTCCCGATATCCGACGGTAGTGTgtgagaacagatcaagga      |
| GRIN2B_MIP_027 | cagaaatgcatgctcactatgggaCTTCAGCTTCCCGATATCCGACGGTAGTGTtccatctcccctctgt  |
| GRIN2B_MIP_028 | cactgacaccatgatcttgaCTTCAGCTTCCCGATATCCGACGGTAGTGTgagattcaaatgagctc     |
| GRIN2B_MIP_029 | gcctctttgctgtcatctctcCTTCAGCTTCCCGATATCCGACGGTAGTGTccagagcctgtggacc     |
| GRIN2B_MIP_030 | cacagggtagctcctcctcaCTTCAGCTTCCCGATATCCGACGGTAGTGTaaacacagaccagga       |
| GRIN2B_MIP_031 | acatcatcaccatcagctcagCTTCAGCTTCCCGATATCCGACGGTAGTGTaaaaactgggaagtgcag   |
| GRIN2B_MIP_032 | gtcttgagtactcagccctCTTCAGCTTCCCGATATCCGACGGTAGTGTaattcgaattctttgtct     |
| GRIN2B_MIP_033 | attgatggtgagtgagccactCTTCAGCTTCCCGATATCCGACGGTAGTGTtccaccagcaaacctc     |
| GRIN2B_MIP_034 | aggaaatcagcagctgctcCTTCAGCTTCCCGATATCCGACGGTAGTGTaacctgatagctgtatt      |
| GRIN2B_MIP_035 | gatgtcaatacagaacccttgaCTTCAGCTTCCCGATATCCGACGGTAGTGTcagccttgggagac      |
| GRIN2B_MIP_036 | ggttaccatggcaagcatgCTTCAGCTTCCCGATATCCGACGGTAGTGTttgttcttaattggccta     |
| GRIN2B_MIP_037 | caaagcaggccccctcacagCTTCAGCTTCCCGATATCCGACGGTAGTGTttttgatgaaccggct      |
| GRIN2B_MIP_038 | gctcagatggtcatcctctgCTTCAGCTTCCCGATATCCGACGGTAGTGTaaagtattgagaggatgc    |
| GRIN2B_MIP_039 | gtgacctggaggaggaccCTTCAGCTTCCCGATATCCGACGGTAGTGTggtttctgattctgtgtt      |
| GRIN2B_MIP_040 | ccctcaaaagtacattgatcaCTTCAGCTTCCCGATATCCGACGGTAGTGTtctactcatttctca      |
| GRIN2B_MIP_041 | aggaaattgtcctcagtgaaCTTCAGCTTCCCGATATCCGACGGTAGTGTactgtctgtctcagcc      |
| GRIN2B_MIP_042 | gtgattatggcaattcactctcCTTCAGCTTCCCGATATCCGACGGTAGTGTgccctctgtccacac     |
| GRIN2B_MIP_043 | gcttctgacatgctgtgagcCTTCAGCTTCCCGATATCCGACGGTAGTGTtctgtggcaggggatac     |
| GRIN2B_MIP_044 | acagtaagaagaatgatggggcCTTCAGCTTCCCGATATCCGACGGTAGTGTagtgggaaactccgcag   |
| GRIN2B_MIP_045 | caaggaagaagccactacaCTTCAGCTTCCCGATATCCGACGGTAGTGTcattgagaatagcttggg     |
| GRIN2B_MIP_046 | atgttgagcattacggaagctCTTCAGCTTCCCGATATCCGACGGTAGTGTgaggacctcctagctc     |
| GRIN2B_MIP_047 | caccaccttttccctgctCTTCAGCTTCCCGATATCCGACGGTAGTGTcctttttgtctgttct        |
| GRIN2B_MIP_048 | atggcttctggtctgtgtatcCTTCAGCTTCCCGATATCCGACGGTAGTGTgcacaaacctcaggcc     |
| GRIN2B_MIP_049 | atcctcgattcattcagcacCTTCAGCTTCCCGATATCCGACGGTAGTGTgggtggaactgtagccat    |
| GRIN2B_MIP_050 | gtcgaagtgcaccagagaaCTTCAGCTTCCCGATATCCGACGGTAGTGTagacatgagatcacagatgc   |
| GRIN2B_MIP_051 | catcaaggatgccacagagaaCTTCAGCTTCCCGATATCCGACGGTAGTGTagtgtcttcccaagt      |
| GRIN2B_MIP_052 | aagaggctagatactcaattcaCTTCAGCTTCCCGATATCCGACGGTAGTGTcgccaaccaaccag      |

## Supplementary References

1. Capelli, L. P. *et al.* Deletion of the RMGA and CHD2 genes in a child with epilepsy and mental deficiency. *Eur. J. Med. Genet.* **55**, 132-134 (2012).
2. Heinzen, E. L. *et al.* Rare deletions at 16p13.11 predispose to a diverse spectrum of sporadic epilepsy syndromes. *Am. J. Hum. Genet.* **86**, 707-718 (2010).
3. Mefford, H. C. *et al.* Rare copy number variants are an important cause of epileptic encephalopathies. *Ann. Neurol.* **70**, 974-985 (2011).
4. Mefford, H. C. *et al.* Genome-wide copy number variation in epilepsy: novel susceptibility loci in idiopathic generalized and focal epilepsies. *PLoS Genet.* **6**, e1000962 (2010).
5. Chen, J., Bardes, E. E., Aronow, B. J. & Jegga, A. G. ToppGene Suite for gene list enrichment analysis and candidate gene prioritization. *Nucleic Acids Res.* **37**, W305-11 (2009).
6. Tranchevent, L. C. *et al.* ENDEAVOUR update: a web resource for gene prioritization in multiple species. *Nucleic Acids Res.* **36**, W377-84 (2008).
7. Szklarczyk, D. *et al.* The STRING database in 2011: functional interaction networks of proteins, globally integrated and scored. *Nucleic Acids Res.* **39**, D561-8 (2011).
8. Thierry, G. *et al.* Molecular characterization of 1q44 microdeletion in 11 patients reveals three candidate genes for intellectual disability and seizures. *Am. J. Med. Genet. A.* **158A**, 1633-1640 (2012).
9. Tokuda, S. *et al.* A novel Akt3 mutation associated with enhanced kinase activity and seizure susceptibility in mice. *Hum. Mol. Genet.* **20**, 988-999 (2011).
10. Katoh, Y. *et al.* The clavesin family, neuron-specific lipid- and clathrin-binding Sec14 proteins regulating lysosomal morphology. *J. Biol. Chem.* **284**, 27646-27654 (2009).
11. Hruska, M. & Dalva, M. B. Ephrin regulation of synapse formation, function and plasticity. *Mol. Cell. Neurosci.* **50**, 35-44 (2012).
12. Wu, F., Mattson, M. P. & Yao, P. J. Neuronal activity and the expression of clathrin-assembly protein AP180. *Biochem. Biophys. Res. Commun.* **402**, 297-300 (2010).
13. Li, K. X. *et al.* Neuregulin 1 regulates excitability of fast-spiking neurons through Kv1.1 and acts in epilepsy. *Nat. Neurosci.* **15**, 267-273 (2011).
14. Yu, Y. X. *et al.* Syntaxin 1A promotes the endocytic sorting of EAAC1 leading to inhibition of glutamate transport. *J. Cell. Sci.* **119**, 3776-3787 (2006).
15. Van Houdt, J. K. *et al.* Heterozygous missense mutations in SMARCA2 cause Nicolaides-Baraitser syndrome. *Nat. Genet.* **44**, 445-9, S1 (2012).
16. Poduri, A. *et al.* Somatic activation of AKT3 causes hemispheric developmental brain malformations. *Neuron* **74**, 41-48 (2012).
